# Supplementary material for: Surface Rupture Kinematics of the 2020 Mw6.6 Masbate (Philippines) Earthquake determined from Optical and Radar Data
Source: Copernicus journal article supplement (doi:10.5194/egusphere-2023-978), 2023-06-22
Supplement: Supplementary file 1 [file egusphere-2023-978-supplement.pdf]

## Table of Contents

|                                                         |           |
|---------------------------------------------------------|-----------|
| <b>S1 Optical Correlation Output Data</b> . . . . .     | <b>1</b>  |
| S1.1 All Valid Offset Maps . . . . .                    | 1         |
| S1.2 Complete Profile Data . . . . .                    | 7         |
| <b>S2 Field Data</b> . . . . .                          | <b>27</b> |
| S2.1 Database . . . . .                                 | 27        |
| S2.2 Photos . . . . .                                   | 30        |
| <b>S3 Earthquake Catalog</b> . . . . .                  | <b>34</b> |
| <b>S4 SBAS Interferometry Output and Data</b> . . . . . | <b>49</b> |
| S4.1 Profile data . . . . .                             | 49        |
| S4.2 Other MintPy data . . . . .                        | 51        |

## S1 Optical Correlation Output Data

### S1.1 All Valid Offset Maps

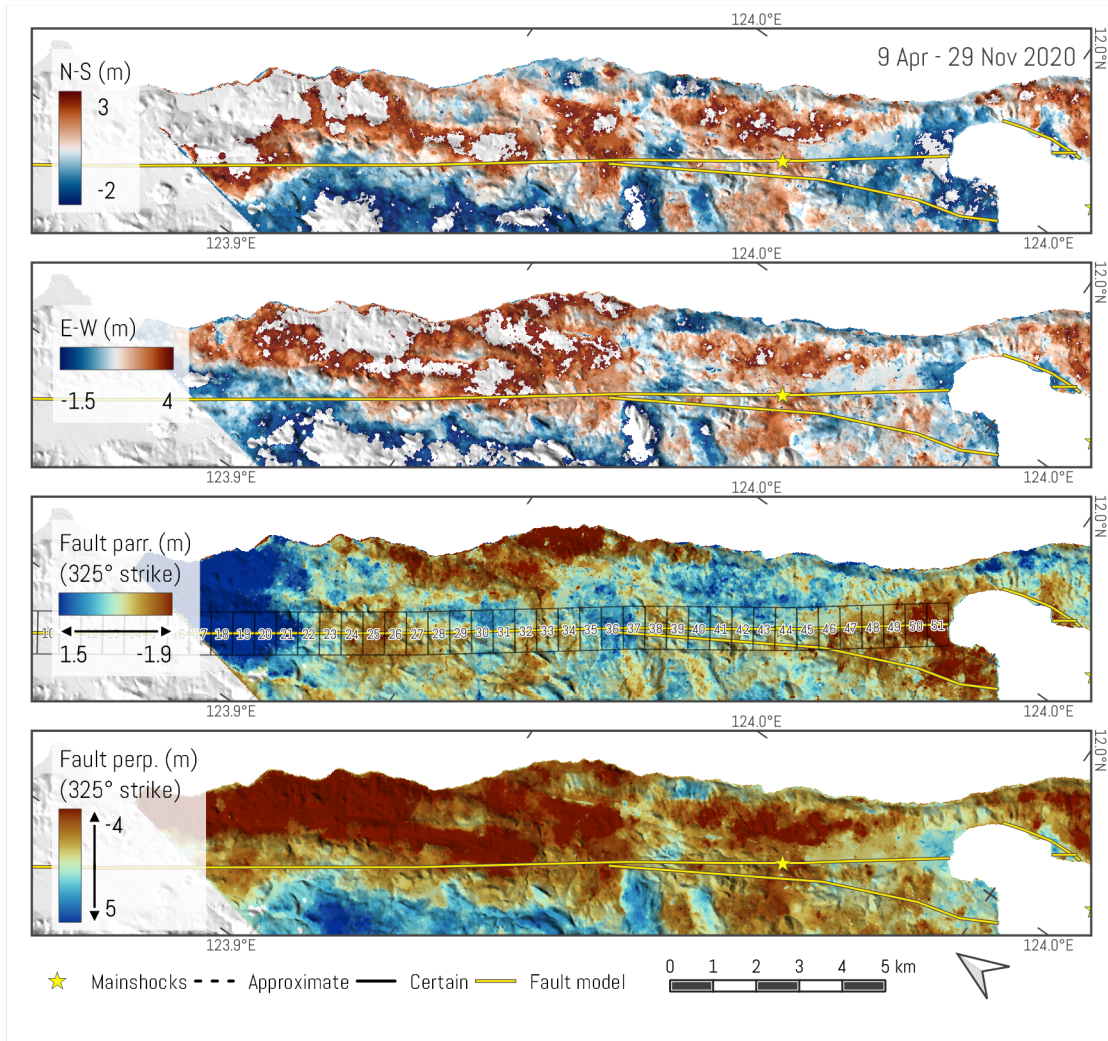

Figure S1: Results of 9 April - 29 November 2020 pair.

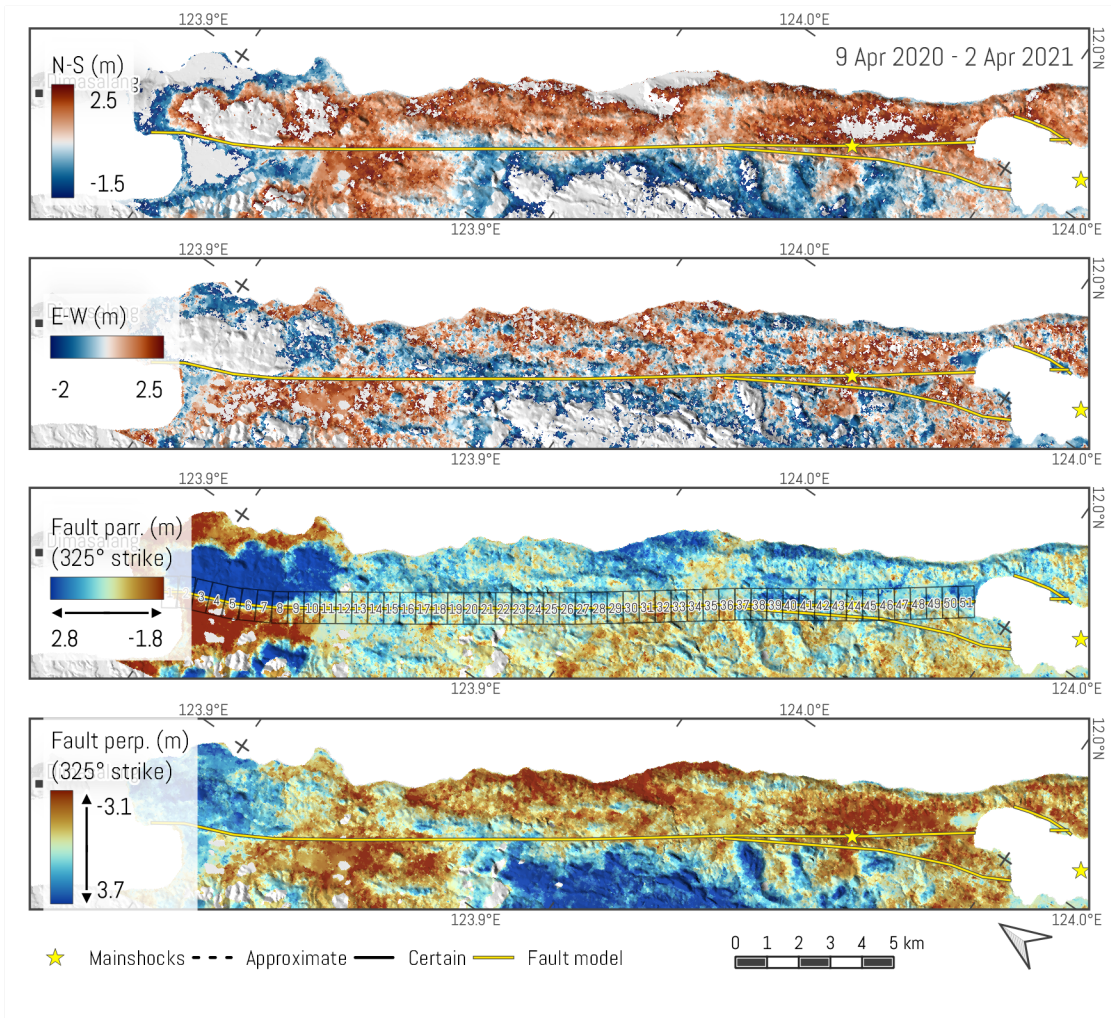

Figure S2: Results of 9 April 2020 (satellite ID 1105) - 2 April 2021 pair.

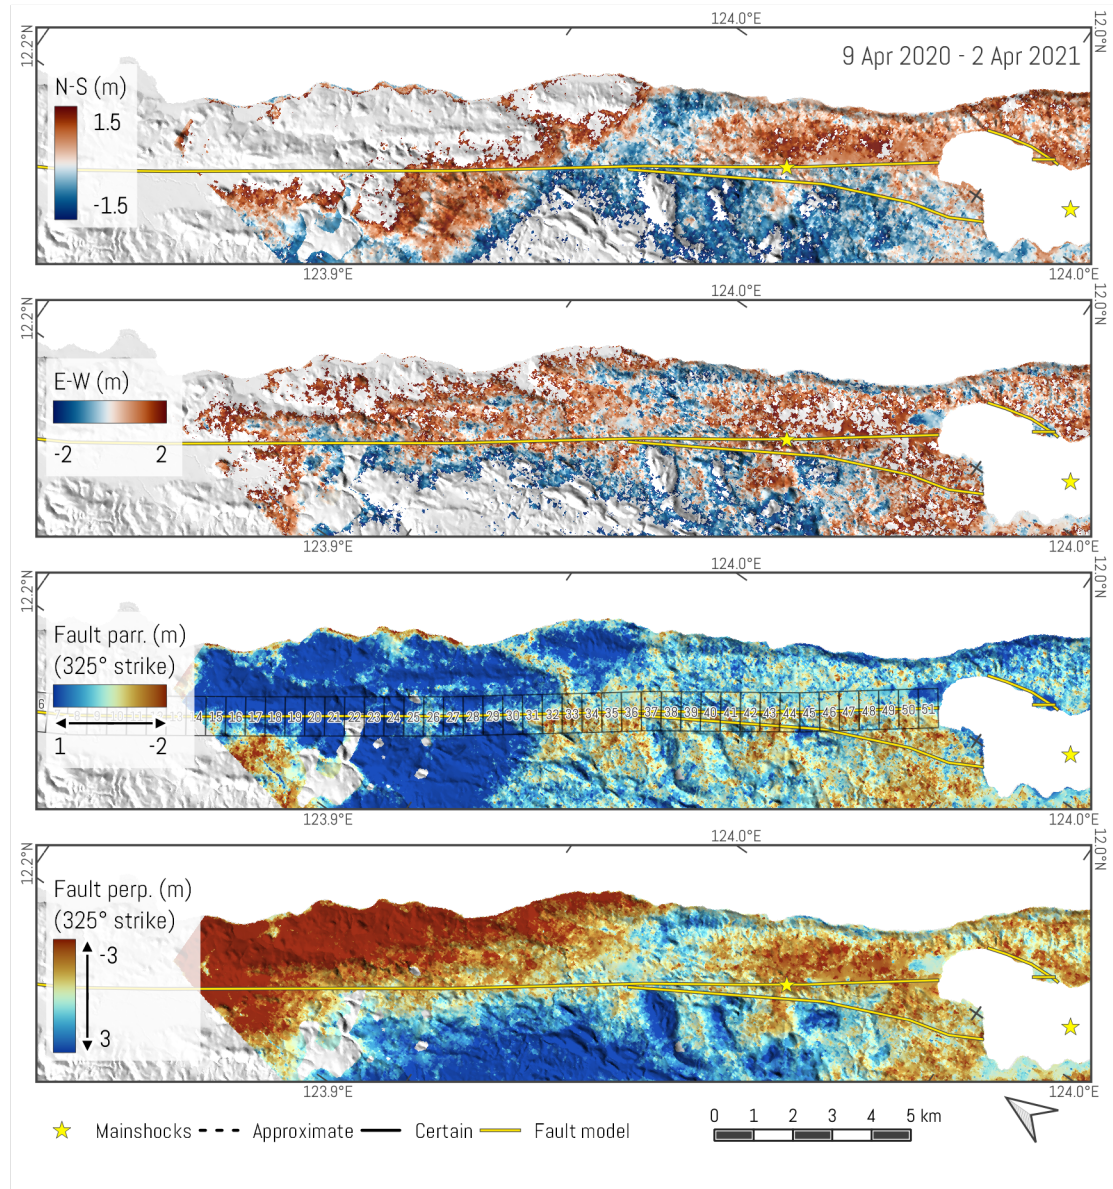

Figure S3: Results of 9 April 2020 (satellite ID 1013) - 2 April 2021 pair.

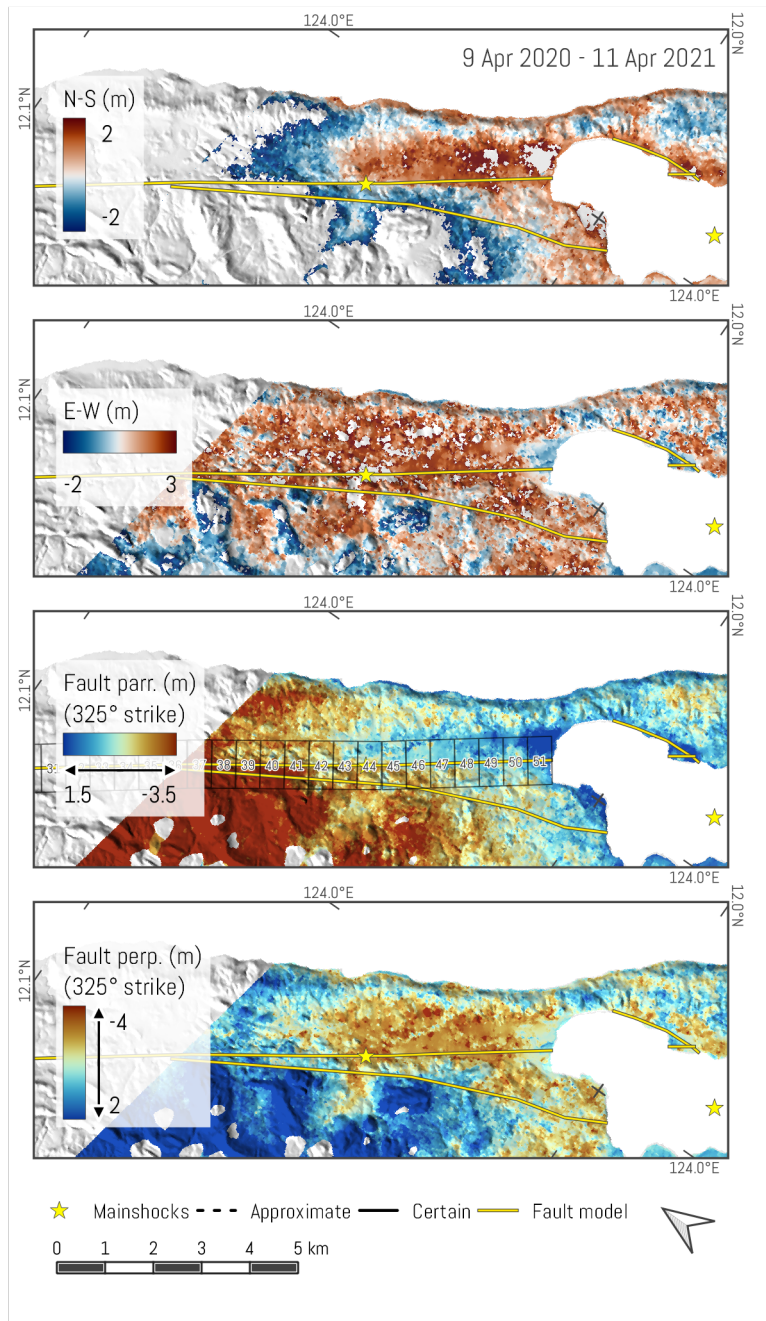

Figure S4: Results of 9 April 2020 - 11 April 2021 pair.

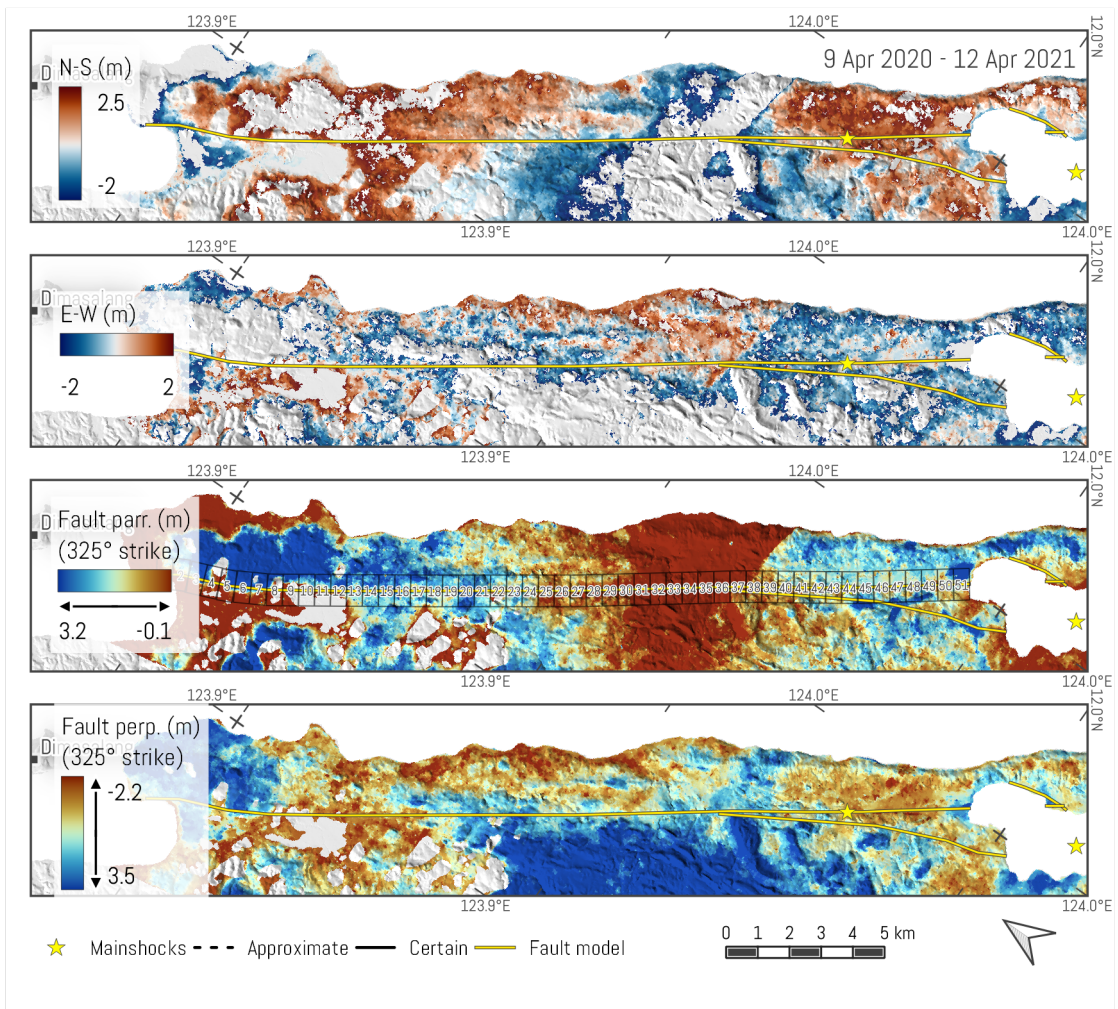

Figure S5: Results of 9 April 2020 - 12 April 2021 pair.

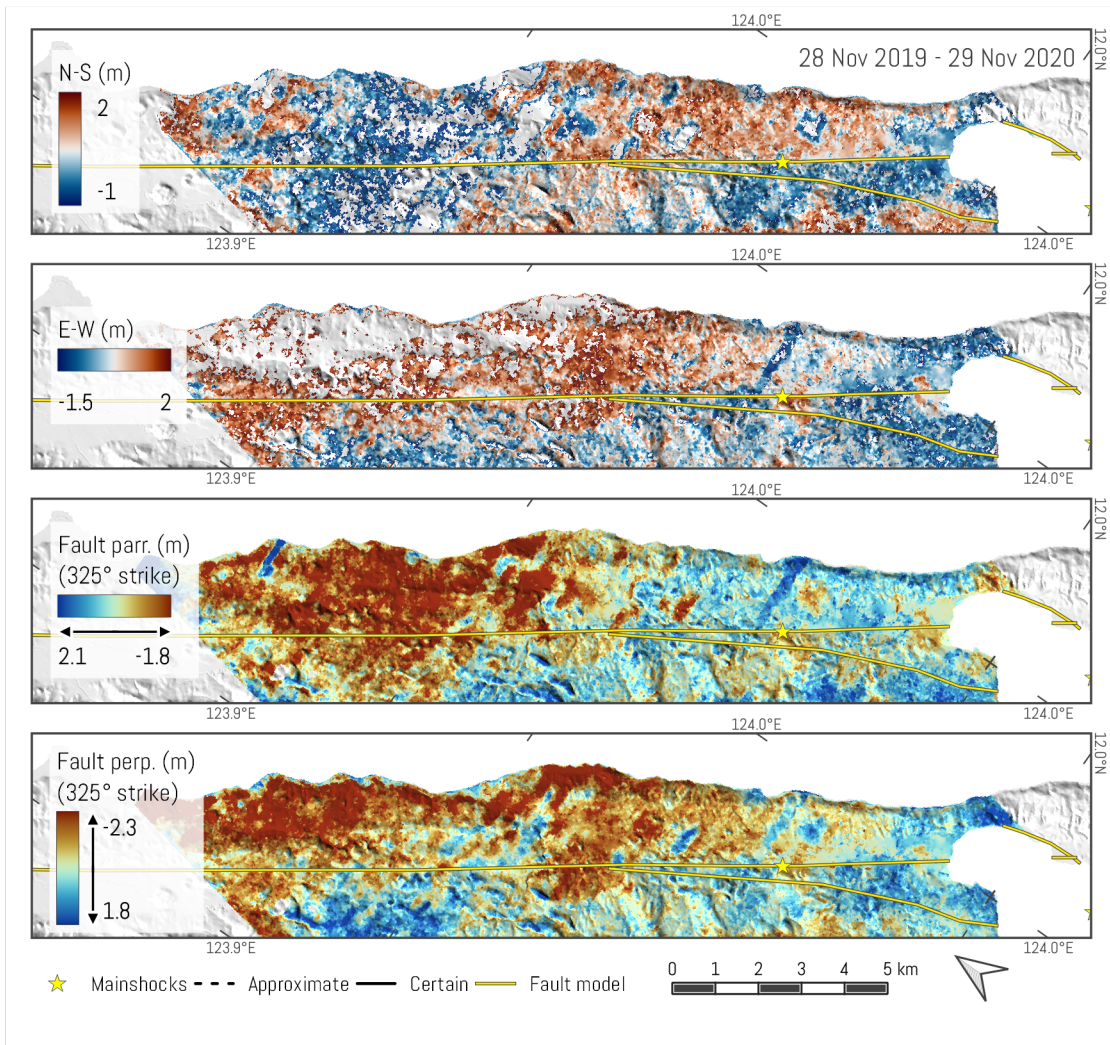

Figure S6: Results of 28 November 2019 - 29 November 2020 pair.

## S1.2 Complete Profile Data

Definition of column names:

- Pair - image pair used
- box - boxID number (box 1 is closest to Naro bay, box 51 is closest to Cataingan bay)
- valid - indicates the validity of the particular box profile
- yOffsetAtX0 - difference between the intercepts of the left and right regression lines denoting the fault parallel offset in meters
- sigmabSum - sum of standard errors of the regression line intercepts of the left and right side
- left\_slope - slope of the regression line of the left side
- left\_int - intercept of the regression line of the left side
- left\_SlopeSD - standard deviation of the slope of the left regression line
- left\_IntSD - standard deviation of the intercept of the left regression line
- left\_RegSD - standard deviation of the left regression line
- left\_sumsq - sum of squares of the left side regression
- column names denoted as "right" refer to the regression of the right side
- ctr\_lat - degree latitude of the box centerpoint
- ctr\_lon - degree longitude of the box centerpoint
- dist\_1st\_m - distance of the centerpoint from the first point of the trace
- azDeg - azimuthal box rotation in degrees
- xMinL - minimum regression limit on the left side
- xMaxL - maximum regression limit on the left side
- column names denoted as "R" refer to the regression of the right side
- X0 - location of the baseline 0 in the x-axis
- dist\_naro - indicates distance of box center from Naro bay in m



Table S1: Compiled regression parameters (western fault block)

| Pair                 | box | left_slope | left_int   | left_SlopeSD | left_IntSD | left_RegSD | left_sumsq |
|----------------------|-----|------------|------------|--------------|------------|------------|------------|
| 9Apr2020-2Apr2021(a) | 51  | 0.00054202 | 1.46942395 | 0.00054789   | 0.02242521 | 0.01449592 | 0.00378237 |
| 9Apr2020-2Apr2021(a) | 50  | 0.00024503 | 0.68387629 | 0.00119372   | 0.06402295 | 0.10517301 | 0.4756386  |
| 9Apr2020-2Apr2021(a) | 49  | 0.00150148 | 0.51973229 | 0.00063248   | 0.06822952 | 0.2290907  | 5.98301037 |
| 9Apr2020-2Apr2021(a) | 48  | 0.00144608 | 0.24205122 | 0.0007289    | 0.04182049 | 0.21146317 | 4.38223403 |
| 9Apr2020-2Apr2021(a) | 47  | 0.00222074 | 0.46975449 | 0.00043837   | 0.03585239 | 0.11778938 | 1.29031344 |
| 9Apr2020-2Apr2021(a) | 46  | 0.00333375 | 0.45613409 | 0.00057686   | 0.05341313 | 0.34124137 | 18.5148624 |
| 9Apr2020-2Apr2021(a) | 45  | 4.61E-05   | 0.57488711 | 0.00083124   | 0.06254323 | 0.05254567 | 0.0938756  |
| 9Apr2020-2Apr2021(a) | 44  | -0.0005937 | 0.13953591 | 0.00029914   | 0.02769822 | 0.17695611 | 4.97884086 |
| 9Apr2020-2Apr2021(a) | 43  | 9.78E-05   | 0.37336489 | 0.00047069   | 0.04086528 | 0.25295549 | 9.53398583 |
| 9Apr2020-2Apr2021(a) | 42  | -0.0007744 | 1.04673339 | 0.0003334    | 0.03087055 | 0.19722324 | 6.18462422 |
| 9Apr2020-2Apr2021(a) | 41  | -0.0001161 | 0.22373254 | 0.00077448   | 0.03683479 | 0.17007443 | 2.34295037 |
| 9Apr2020-2Apr2021(a) | 40  | 0.00277014 | 0.49794674 | 0.00158016   | 0.08245153 | 0.39814947 | 14.1085473 |
| 9Apr2020-2Apr2021(a) | 39  | 0.00236923 | 1.0751462  | 0.00045757   | 0.04831841 | 0.17872378 | 3.83306263 |
| 9Apr2020-2Apr2021(a) | 38  | 0.00242235 | 0.63269486 | 0.00041893   | 0.02766386 | 0.14978645 | 2.53526568 |
| 9Apr2020-2Apr2021(a) | 37  | 0.0002008  | -0.0063048 | 0.00156877   | 0.04173247 | 0.07941559 | 0.18289824 |
| 9Apr2020-2Apr2021(a) | 36  | 0.00481618 | -0.0833054 | 0.00051525   | 0.04624428 | 0.17004074 | 3.09378223 |
| 9Apr2020-2Apr2021(a) | 35  |            |            |              |            |            |            |
| 9Apr2020-2Apr2021(a) | 34  | -0.0037422 | -0.1869461 | 0.00025244   | 0.02420978 | 0.13431952 | 2.67017651 |
| 9Apr2020-2Apr2021(a) | 33  | -0.0004164 | 0.08879188 | 0.00027209   | 0.02519365 | 0.16095511 | 4.11914107 |
| 9Apr2020-2Apr2021(a) | 32  | -6.21E-05  | -0.9843665 | 0.00096578   | 0.03199363 | 0.12420558 | 0.86391342 |
| 9Apr2020-2Apr2021(a) | 31  | 0.0027678  | -0.5827103 | 0.00227611   | 0.09523692 | 0.05155277 | 0.042523   |
| 9Apr2020-2Apr2021(a) | 30  |            |            |              |            |            |            |
| 9Apr2020-2Apr2021(a) | 29  |            |            |              |            |            |            |
| 9Apr2020-2Apr2021(a) | 28  |            |            |              |            |            |            |
| 9Apr2020-2Apr2021(a) | 27  |            |            |              |            |            |            |
| 9Apr2020-2Apr2021(a) | 26  |            |            |              |            |            |            |
| 9Apr2020-2Apr2021(a) | 25  |            |            |              |            |            |            |
| 9Apr2020-2Apr2021(a) | 24  | -3.83E-05  | 0.68397177 | 0.00095809   | 0.08283624 | 0.08163489 | 0.27989873 |
| 9Apr2020-2Apr2021(a) | 23  | 0.00257756 | 0.60555809 | 0.00083045   | 0.05394869 | 0.14747387 | 1.52239805 |
| 9Apr2020-2Apr2021(a) | 22  |            |            |              |            |            |            |
| 9Apr2020-2Apr2021(a) | 21  | -0.0001503 | 0.15404388 | 0.000256     | 0.01986103 | 0.11634617 | 1.80034546 |
| 9Apr2020-2Apr2021(a) | 20  |            |            |              |            |            |            |
| 9Apr2020-2Apr2021(a) | 19  |            |            |              |            |            |            |
| 9Apr2020-2Apr2021(a) | 18  | 0.00060881 | 0.13842822 | 0.00135676   | 0.030186   | 0.01492436 | 0.00200463 |
| 9Apr2020-2Apr2021(a) | 17  |            |            |              |            |            |            |
| 9Apr2020-2Apr2021(a) | 16  |            |            |              |            |            |            |
| 9Apr2020-2Apr2021(a) | 15  | 0.00011084 | 0.88931878 | 0.00028595   | 0.0230101  | 0.13722624 | 2.59868375 |
| 9Apr2020-2Apr2021(a) | 14  | 4.20E-05   | 0.28256542 | 0.00105119   | 0.02511339 | 0.08357479 | 0.27938985 |
| 9Apr2020-2Apr2021(a) | 13  |            |            |              |            |            |            |
| 9Apr2020-2Apr2021(a) | 12  |            |            |              |            |            |            |
| 9Apr2020-2Apr2021(a) | 11  | 0.00039251 | 0.26838703 | 0.00039833   | 0.0283734  | 0.15941374 | 3.10035416 |
| 9Apr2020-2Apr2021(a) | 10  |            |            |              |            |            |            |
| 9Apr2020-2Apr2021(a) | 9   |            |            |              |            |            |            |
| 9Apr2020-2Apr2021(a) | 8   |            |            |              |            |            |            |
| 9Apr2020-2Apr2021(a) | 7   |            |            |              |            |            |            |
| 9Apr2020-2Apr2021(a) | 6   |            |            |              |            |            |            |
| 9Apr2020-2Apr2021(a) | 5   |            |            |              |            |            |            |
| 9Apr2020-2Apr2021(a) | 4   |            |            |              |            |            |            |
| 9Apr2020-2Apr2021(a) | 3   |            |            |              |            |            |            |
| 9Apr2020-2Apr2021(a) | 2   |            |            |              |            |            |            |
| 9Apr2020-2Apr2021(a) | 1   |            |            |              |            |            |            |
| 9Apr2020-2Apr2021(b) | 51  | 0.00159725 | -0.4507299 | 0.00023582   | 0.01155764 | 0.00040845 | 1.67E-07   |
| 9Apr2020-2Apr2021(b) | 50  | 0.00109952 | -0.9290425 | 0.00030539   | 0.0351407  | 0.08596213 | 0.70939078 |
| 9Apr2020-2Apr2021(b) | 49  |            |            |              |            |            |            |

|                      |    |            |            |            |            |            |            |
|----------------------|----|------------|------------|------------|------------|------------|------------|
| 9Apr2020-2Apr2021(b) | 48 | -0.0012455 | -1.0626459 | 0.00316471 | 0.27385693 | 0.02192574 | 0.00288443 |
| 9Apr2020-2Apr2021(b) | 47 | 0.00013265 | -0.9965455 | 0.00085772 | 0.06236018 | 0.32276818 | 12.1889776 |
| 9Apr2020-2Apr2021(b) | 46 | 0.00066686 | -1.0887126 | 0.0012856  | 0.0655559  | 0.04453433 | 0.04363274 |
| 9Apr2020-2Apr2021(b) | 45 |            |            |            |            |            |            |
| 9Apr2020-2Apr2021(b) | 44 | -7.22E-05  | -0.9001846 | 0.00082435 | 0.01541124 | 0.04579063 | 0.06500024 |
| 9Apr2020-2Apr2021(b) | 43 | 0.00048164 | -1.0750884 | 0.0008495  | 0.09866953 | 0.06753951 | 0.18246341 |
| 9Apr2020-2Apr2021(b) | 42 | -0.0030836 | -0.7180834 | 0.00031211 | 0.03159789 | 0.14027571 | 2.59740014 |
| 9Apr2020-2Apr2021(b) | 41 | -0.0006561 | -0.2038854 | 0.00058523 | 0.0695498  | 0.14264131 | 1.77014935 |
| 9Apr2020-2Apr2021(b) | 40 | 0.00080766 | -0.344379  | 0.00106435 | 0.13073823 | 0.10645715 | 0.53265687 |
| 9Apr2020-2Apr2021(b) | 39 | -0.001803  | -0.6786542 | 0.00022919 | 0.02122152 | 0.1355783  | 2.92265447 |
| 9Apr2020-2Apr2021(b) | 38 | -0.0004871 | -0.51344   | 0.00021487 | 0.01989519 | 0.12710472 | 2.56874197 |
| 9Apr2020-2Apr2021(b) | 37 | -0.0005803 | -0.9251435 | 0.00164924 | 0.04320932 | 0.15014112 | 0.9918637  |
| 9Apr2020-2Apr2021(b) | 36 | 0.00032125 | -1.0762703 | 0.0004279  | 0.03962091 | 0.25312681 | 10.1876358 |
| 9Apr2020-2Apr2021(b) | 35 | 0.00019494 | -0.9436069 | 0.00100216 | 0.11194579 | 0.19293234 | 2.75449378 |
| 9Apr2020-2Apr2021(b) | 34 | -0.0008173 | -1.0999627 | 0.00024315 | 0.01395097 | 0.07054235 | 0.48766981 |
| 9Apr2020-2Apr2021(b) | 33 | -0.0015204 | -1.4835137 | 0.00061297 | 0.01464412 | 0.04873414 | 0.09500065 |
| 9Apr2020-2Apr2021(b) | 32 |            |            |            |            |            |            |
| 9Apr2020-2Apr2021(b) | 31 | 0.00763171 | -0.3810304 | 0.00076704 | 0.03622114 | 0.03338752 | 0.0289829  |
| 9Apr2020-2Apr2021(b) | 30 |            |            |            |            |            |            |
| 9Apr2020-2Apr2021(b) | 29 | 0.00069066 | -0.0023906 | 0.00289461 | 0.0691533  | 0.23013509 | 2.11848635 |
| 9Apr2020-2Apr2021(b) | 28 | -0.0012282 | 0.17717191 | 0.00157897 | 0.02529631 | 0.03873027 | 0.02550057 |
| 9Apr2020-2Apr2021(b) | 27 |            |            |            |            |            |            |
| 9Apr2020-2Apr2021(b) | 26 |            |            |            |            |            |            |
| 9Apr2020-2Apr2021(b) | 25 | -0.0035803 | 0.1261032  | 0.00013935 | 0.01290262 | 0.08243118 | 1.08038893 |
| 9Apr2020-2Apr2021(b) | 24 |            |            |            |            |            |            |
| 9Apr2020-2Apr2021(b) | 23 |            |            |            |            |            |            |
| 9Apr2020-2Apr2021(b) | 22 |            |            |            |            |            |            |
| 9Apr2020-2Apr2021(b) | 21 |            |            |            |            |            |            |
| 9Apr2020-2Apr2021(b) | 20 |            |            |            |            |            |            |
| 9Apr2020-2Apr2021(b) | 19 | 0.01032105 | 1.76465567 | 0.00065002 | 0.01477868 | 0.04806033 | 0.08777223 |
| 9Apr2020-2Apr2021(b) | 18 | 0.00452302 | 1.19883386 | 0.00048312 | 0.04473322 | 0.2857879  | 12.9862813 |
| 9Apr2020-2Apr2021(b) | 17 | 0.00475982 | 0.79325807 | 0.00037204 | 0.01232468 | 0.04784684 | 0.12820195 |
| 9Apr2020-2Apr2021(b) | 16 | 0.00309109 | 0.50516544 | 0.00042904 | 0.02808402 | 0.15141176 | 2.56765828 |
| 9Apr2020-2Apr2021(b) | 15 |            |            |            |            |            |            |
| 9Apr2020-2Apr2021(b) | 14 |            |            |            |            |            |            |
| 9Apr2020-2Apr2021(b) | 13 |            |            |            |            |            |            |
| 9Apr2020-2Apr2021(b) | 12 |            |            |            |            |            |            |
| 9Apr2020-2Apr2021(b) | 11 |            |            |            |            |            |            |
| 9Apr2020-2Apr2021(b) | 10 |            |            |            |            |            |            |
| 9Apr2020-2Apr2021(b) | 9  |            |            |            |            |            |            |
| 9Apr2020-2Apr2021(b) | 8  |            |            |            |            |            |            |
| 9Apr2020-2Apr2021(b) | 7  |            |            |            |            |            |            |
| 9Apr2020-2Apr2021(b) | 6  |            |            |            |            |            |            |
| 9Apr2020-2Apr2021(b) | 5  |            |            |            |            |            |            |
| 9Apr2020-2Apr2021(b) | 4  |            |            |            |            |            |            |
| 9Apr2020-2Apr2021(b) | 3  |            |            |            |            |            |            |
| 9Apr2020-2Apr2021(b) | 2  |            |            |            |            |            |            |
| 9Apr2020-2Apr2021(b) | 1  |            |            |            |            |            |            |
| 9Apr2020-11Apr2021   | 51 | -0.0001918 | 1.10269139 | 0.00144158 | 0.00948049 | 0.01800529 | 0.00324191 |
| 9Apr2020-11Apr2021   | 50 | 0.00033621 | -0.8113609 | 0.00073588 | 0.07063263 | 0.06917237 | 0.21531677 |
| 9Apr2020-11Apr2021   | 49 |            |            |            |            |            |            |
| 9Apr2020-11Apr2021   | 48 | -0.0002519 | -0.8034536 | 0.00129418 | 0.1718301  | 0.12944525 | 0.78753542 |
| 9Apr2020-11Apr2021   | 47 | -5.74E-05  | -1.0460302 | 0.00247505 | 0.29833705 | 0.02369675 | 0.00449229 |
| 9Apr2020-11Apr2021   | 46 | 0.00898808 | -1.1964207 | 0.00045552 | 0.04502163 | 0.22094285 | 6.78538806 |
| 9Apr2020-11Apr2021   | 45 |            |            |            |            |            |            |
| 9Apr2020-11Apr2021   | 44 | -0.0009285 | -1.881344  | 0.00117123 | 0.10501277 | 0.15451766 | 1.36091523 |

|                    |    |            |            |            |            |            |            |
|--------------------|----|------------|------------|------------|------------|------------|------------|
| 9Apr2020-11Apr2021 | 43 | 0.00057729 | -2.1324389 | 0.00047081 | 0.02456653 | 0.11862912 | 1.25248525 |
| 9Apr2020-11Apr2021 | 42 |            |            |            |            |            |            |
| 9Apr2020-11Apr2021 | 41 | 0.00361751 | -3.5316447 | 0.0029349  | 0.18771327 | 0.11446115 | 0.31443252 |
| 9Apr2020-11Apr2021 | 40 |            |            |            |            |            |            |
| 9Apr2020-11Apr2021 | 39 | 0.00672206 | -3.091719  | 0.00034455 | 0.03190254 | 0.20381628 | 6.60503126 |
| 9Apr2020-11Apr2021 | 38 | 0.00298109 | -4.0446617 | 0.00089077 | 0.02245112 | 0.02356757 | 0.00999774 |
| 9Apr2020-11Apr2021 | 37 |            |            |            |            |            |            |
| 9Apr2020-11Apr2021 | 36 |            |            |            |            |            |            |
| 9Apr2020-11Apr2021 | 35 |            |            |            |            |            |            |
| 9Apr2020-11Apr2021 | 34 |            |            |            |            |            |            |
| 9Apr2020-11Apr2021 | 33 |            |            |            |            |            |            |
| 9Apr2020-11Apr2021 | 32 |            |            |            |            |            |            |
| 9Apr2020-11Apr2021 | 31 |            |            |            |            |            |            |
| 9Apr2020-11Apr2021 | 30 |            |            |            |            |            |            |
| 9Apr2020-11Apr2021 | 29 |            |            |            |            |            |            |
| 9Apr2020-11Apr2021 | 28 |            |            |            |            |            |            |
| 9Apr2020-11Apr2021 | 27 |            |            |            |            |            |            |
| 9Apr2020-11Apr2021 | 26 |            |            |            |            |            |            |
| 9Apr2020-11Apr2021 | 25 |            |            |            |            |            |            |
| 9Apr2020-11Apr2021 | 24 |            |            |            |            |            |            |
| 9Apr2020-11Apr2021 | 23 |            |            |            |            |            |            |
| 9Apr2020-11Apr2021 | 22 |            |            |            |            |            |            |
| 9Apr2020-11Apr2021 | 21 |            |            |            |            |            |            |
| 9Apr2020-11Apr2021 | 20 |            |            |            |            |            |            |
| 9Apr2020-11Apr2021 | 19 |            |            |            |            |            |            |
| 9Apr2020-11Apr2021 | 18 |            |            |            |            |            |            |
| 9Apr2020-11Apr2021 | 17 |            |            |            |            |            |            |
| 9Apr2020-11Apr2021 | 16 |            |            |            |            |            |            |
| 9Apr2020-11Apr2021 | 15 |            |            |            |            |            |            |
| 9Apr2020-11Apr2021 | 14 |            |            |            |            |            |            |
| 9Apr2020-11Apr2021 | 13 |            |            |            |            |            |            |
| 9Apr2020-11Apr2021 | 12 |            |            |            |            |            |            |
| 9Apr2020-11Apr2021 | 11 |            |            |            |            |            |            |
| 9Apr2020-11Apr2021 | 10 |            |            |            |            |            |            |
| 9Apr2020-11Apr2021 | 9  |            |            |            |            |            |            |
| 9Apr2020-11Apr2021 | 8  |            |            |            |            |            |            |
| 9Apr2020-11Apr2021 | 7  |            |            |            |            |            |            |
| 9Apr2020-11Apr2021 | 6  |            |            |            |            |            |            |
| 9Apr2020-11Apr2021 | 5  |            |            |            |            |            |            |
| 9Apr2020-11Apr2021 | 4  |            |            |            |            |            |            |
| 9Apr2020-11Apr2021 | 3  |            |            |            |            |            |            |
| 9Apr2020-11Apr2021 | 2  |            |            |            |            |            |            |
| 9Apr2020-11Apr2021 | 1  |            |            |            |            |            |            |
| 9Apr2020-12Apr2021 | 51 | -0.0008025 | 1.63076889 | 0.00050563 | 0.01267869 | 0.01145234 | 0.0020985  |
| 9Apr2020-12Apr2021 | 50 | 0.00124373 | 1.09922334 | 0.00017137 | 0.01740443 | 0.02917925 | 0.05789716 |
| 9Apr2020-12Apr2021 | 49 |            |            |            |            |            |            |
| 9Apr2020-12Apr2021 | 48 |            |            |            |            |            |            |
| 9Apr2020-12Apr2021 | 47 |            |            |            |            |            |            |
| 9Apr2020-12Apr2021 | 46 | 0.00078412 | 1.18600159 | 0.00227796 | 0.1447581  | 0.01578218 | 0.00149446 |
| 9Apr2020-12Apr2021 | 45 |            |            |            |            |            |            |
| 9Apr2020-12Apr2021 | 44 | -0.0046116 | 1.26647098 | 0.00012023 | 0.01113222 | 0.07112058 | 0.80424376 |
| 9Apr2020-12Apr2021 | 43 | 0.0050403  | 1.08573195 | 0.00059369 | 0.02789318 | 0.12803186 | 1.31137266 |
| 9Apr2020-12Apr2021 | 42 | -0.0002948 | 1.0531296  | 0.00094705 | 0.03469568 | 0.06235554 | 0.13608747 |
| 9Apr2020-12Apr2021 | 41 | 0.00182905 | 0.99823769 | 0.00049673 | 0.0290736  | 0.14843938 | 2.20342485 |
| 9Apr2020-12Apr2021 | 40 | 0.00101885 | 0.63287133 | 0.00024014 | 0.02048095 | 0.0903671  | 0.95544681 |
| 9Apr2020-12Apr2021 | 39 | -0.0003851 | 0.26368018 | 0.00083673 | 0.07628811 | 0.02052413 | 0.00716108 |

|                     |    |            |            |            |            |            |            |
|---------------------|----|------------|------------|------------|------------|------------|------------|
| 9Apr2020-12Apr2021  | 38 | -0.0039807 | -0.0662022 | 0.00017296 | 0.01491643 | 0.09203077 | 1.25351012 |
| 9Apr2020-12Apr2021  | 37 |            |            |            |            |            |            |
| 9Apr2020-12Apr2021  | 36 |            |            |            |            |            |            |
| 9Apr2020-12Apr2021  | 35 | 0.00027338 | -2.8001869 | 0.0001927  | 0.02139133 | 0.06272224 | 0.41701237 |
| 9Apr2020-12Apr2021  | 34 |            |            |            |            |            |            |
| 9Apr2020-12Apr2021  | 33 |            |            |            |            |            |            |
| 9Apr2020-12Apr2021  | 32 | -0.0020218 | -2.1752565 | 0.00016298 | 0.01509099 | 0.09641206 | 1.47795027 |
| 9Apr2020-12Apr2021  | 31 | 0.00115461 | -1.7068968 | 0.00016541 | 0.00805799 | 0.03763916 | 0.11758662 |
| 9Apr2020-12Apr2021  | 30 | 0.00101433 | -0.5792901 | 0.00049516 | 0.01059404 | 0.02387586 | 0.01596158 |
| 9Apr2020-12Apr2021  | 29 | 0.00043689 | -0.5090783 | 0.00110975 | 0.02514757 | 0.05088548 | 0.06991197 |
| 9Apr2020-12Apr2021  | 28 | 0.00026088 | -0.4688621 | 0.00047736 | 0.00892414 | 0.02651584 | 0.02179578 |
| 9Apr2020-12Apr2021  | 27 | -2.82E-05  | -0.5920088 | 0.00365716 | 0.01983539 | 0.03501465 | 0.0098082  |
| 9Apr2020-12Apr2021  | 26 |            |            |            |            |            |            |
| 9Apr2020-12Apr2021  | 25 |            |            |            |            |            |            |
| 9Apr2020-12Apr2021  | 24 |            |            |            |            |            |            |
| 9Apr2020-12Apr2021  | 23 | -0.0030121 | 1.84569908 | 0.00249323 | 0.01208639 | 0.02048399 | 0.00293716 |
| 9Apr2020-12Apr2021  | 22 |            |            |            |            |            |            |
| 9Apr2020-12Apr2021  | 21 | 0.00056403 | 2.45103972 | 0.0003404  | 0.00900768 | 0.01179171 | 0.00305898 |
| 9Apr2020-12Apr2021  | 20 |            |            |            |            |            |            |
| 9Apr2020-12Apr2021  | 19 | 0.00290202 | 1.82283633 | 0.00074855 | 0.03703232 | 0.0574166  | 0.12856999 |
| 9Apr2020-12Apr2021  | 18 | 0.00222899 | 2.00426765 | 0.00165042 | 0.06373744 | 0.01580159 | 0.00199752 |
| 9Apr2020-12Apr2021  | 17 |            |            |            |            |            |            |
| 9Apr2020-12Apr2021  | 16 |            |            |            |            |            |            |
| 9Apr2020-12Apr2021  | 15 | 0.00496382 | 2.6235791  | 0.00035176 | 0.03935171 | 0.04758492 | 0.13133084 |
| 9Apr2020-12Apr2021  | 14 | 0.00237467 | 2.1932197  | 0.00080864 | 0.02640179 | 0.04902115 | 0.07930141 |
| 9Apr2020-12Apr2021  | 13 |            |            |            |            |            |            |
| 9Apr2020-12Apr2021  | 12 |            |            |            |            |            |            |
| 9Apr2020-12Apr2021  | 11 |            |            |            |            |            |            |
| 9Apr2020-12Apr2021  | 10 |            |            |            |            |            |            |
| 9Apr2020-12Apr2021  | 9  |            |            |            |            |            |            |
| 9Apr2020-12Apr2021  | 8  |            |            |            |            |            |            |
| 9Apr2020-12Apr2021  | 7  |            |            |            |            |            |            |
| 9Apr2020-12Apr2021  | 6  |            |            |            |            |            |            |
| 9Apr2020-12Apr2021  | 5  |            |            |            |            |            |            |
| 9Apr2020-12Apr2021  | 4  |            |            |            |            |            |            |
| 9Apr2020-12Apr2021  | 3  |            |            |            |            |            |            |
| 9Apr2020-12Apr2021  | 2  |            |            |            |            |            |            |
| 9Apr2020-12Apr2021  | 1  |            |            |            |            |            |            |
| 28Nov2019-29Nov2020 | 51 | 0.00074556 | -0.275509  | 0.00161546 | 0.17593093 | 0.08572581 | 0.22046743 |
| 28Nov2019-29Nov2020 | 50 | -0.0004155 | -0.5104376 | 0.00038451 | 0.02529171 | 0.05861443 | 0.21644605 |
| 28Nov2019-29Nov2020 | 49 |            |            |            |            |            |            |
| 28Nov2019-29Nov2020 | 48 | 0.00227308 | 0.42391378 | 0.00134505 | 0.05484978 | 0.02561495 | 0.00918576 |
| 28Nov2019-29Nov2020 | 47 |            |            |            |            |            |            |
| 28Nov2019-29Nov2020 | 46 | -0.000595  | -0.1062332 | 0.00092998 | 0.03302396 | 0.05637679 | 0.1048853  |
| 28Nov2019-29Nov2020 | 45 | 0.00171976 | -0.2889804 | 0.00055394 | 0.03218449 | 0.11086107 | 0.93405341 |
| 28Nov2019-29Nov2020 | 44 | 0.00027886 | -0.430993  | 0.00080943 | 0.08768954 | 0.03711475 | 0.03719262 |
| 28Nov2019-29Nov2020 | 43 | 0.00082908 | -0.0114256 | 0.0004494  | 0.05495478 | 0.09515583 | 0.71531589 |
| 28Nov2019-29Nov2020 | 42 | 0.00010532 | 0.2270684  | 0.00667032 | 0.0539499  | 0.06386342 | 0.03262829 |
| 28Nov2019-29Nov2020 | 41 |            |            |            |            |            |            |
| 28Nov2019-29Nov2020 | 40 |            |            |            |            |            |            |
| 28Nov2019-29Nov2020 | 39 |            |            |            |            |            |            |
| 28Nov2019-29Nov2020 | 38 |            |            |            |            |            |            |
| 28Nov2019-29Nov2020 | 37 | -0.0029803 | 0.44470055 | 0.00155665 | 0.03817769 | 0.03241054 | 0.01575665 |
| 28Nov2019-29Nov2020 | 36 | -0.0009068 | -0.9115022 | 0.00167721 | 0.02370447 | 0.02625245 | 0.00827029 |
| 28Nov2019-29Nov2020 | 35 | -0.0005222 | -0.1348288 | 0.00211777 | 0.21085646 | 0.02645094 | 0.00699652 |
| 28Nov2019-29Nov2020 | 34 | -0.0003036 | -0.6273973 | 0.00049282 | 0.04925754 | 0.10822239 | 0.94867888 |

|                     |    |            |            |            |            |            |            |
|---------------------|----|------------|------------|------------|------------|------------|------------|
| 28Nov2019-29Nov2020 | 33 |            |            |            |            |            |            |
| 28Nov2019-29Nov2020 | 32 |            |            |            |            |            |            |
| 28Nov2019-29Nov2020 | 31 |            |            |            |            |            |            |
| 28Nov2019-29Nov2020 | 30 |            |            |            |            |            |            |
| 28Nov2019-29Nov2020 | 29 | -0.0002411 | -1.7131261 | 0.00171724 | 0.09468443 | 0.02411274 | 0.00639567 |
| 28Nov2019-29Nov2020 | 28 | 0.00018182 | -1.7470782 | 0.0052959  | 0.07742709 | 0.02426887 | 0.00235591 |
| 28Nov2019-29Nov2020 | 27 |            |            |            |            |            |            |
| 28Nov2019-29Nov2020 | 26 | -0.002771  | -1.8334223 | 0.00213154 | 0.08032031 | 0.23294028 | 2.71305876 |
| 28Nov2019-29Nov2020 | 25 | -0.001189  | -1.9961246 | 0.00638898 | 0.4889034  | 0.029278   | 0.00342881 |
| 28Nov2019-29Nov2020 | 24 |            |            |            |            |            |            |
| 28Nov2019-29Nov2020 | 23 | -0.0004215 | -1.0509688 | 0.00088491 | 0.05681033 | 0.01842444 | 0.0050919  |
| 28Nov2019-29Nov2020 | 22 |            |            |            |            |            |            |
| 28Nov2019-29Nov2020 | 21 |            |            |            |            |            |            |
| 28Nov2019-29Nov2020 | 20 |            |            |            |            |            |            |
| 28Nov2019-29Nov2020 | 19 | -0.0007942 | -0.6140679 | 0.00128596 | 0.01736047 | 0.04454697 | 0.04365752 |
| 28Nov2019-29Nov2020 | 18 | 0.0007266  | -0.684228  | 0.00137746 | 0.02582208 | 0.01318821 | 0.00139143 |
| 28Nov2019-29Nov2020 | 17 |            |            |            |            |            |            |
| 28Nov2019-29Nov2020 | 16 |            |            |            |            |            |            |
| 28Nov2019-29Nov2020 | 15 |            |            |            |            |            |            |
| 28Nov2019-29Nov2020 | 14 |            |            |            |            |            |            |
| 28Nov2019-29Nov2020 | 13 |            |            |            |            |            |            |
| 28Nov2019-29Nov2020 | 12 |            |            |            |            |            |            |
| 28Nov2019-29Nov2020 | 11 |            |            |            |            |            |            |
| 28Nov2019-29Nov2020 | 10 |            |            |            |            |            |            |
| 28Nov2019-29Nov2020 | 9  |            |            |            |            |            |            |
| 28Nov2019-29Nov2020 | 8  |            |            |            |            |            |            |
| 28Nov2019-29Nov2020 | 7  |            |            |            |            |            |            |
| 28Nov2019-29Nov2020 | 6  |            |            |            |            |            |            |
| 28Nov2019-29Nov2020 | 5  |            |            |            |            |            |            |
| 28Nov2019-29Nov2020 | 4  |            |            |            |            |            |            |
| 28Nov2019-29Nov2020 | 3  |            |            |            |            |            |            |
| 28Nov2019-29Nov2020 | 2  |            |            |            |            |            |            |
| 28Nov2019-29Nov2020 | 1  |            |            |            |            |            |            |
| 9Apr-29Nov2020      | 51 |            |            |            |            |            |            |
| 9Apr-29Nov2020      | 50 | -0.0005093 | -1.9547025 | 0.00043251 | 0.02181864 | 0.10365206 | 0.92396246 |
| 9Apr-29Nov2020      | 49 | -0.0005524 | -1.5396211 | 0.00168771 | 0.12461975 | 0.05846415 | 0.07519724 |
| 9Apr-29Nov2020      | 48 |            |            |            |            |            |            |
| 9Apr-29Nov2020      | 47 |            |            |            |            |            |            |
| 9Apr-29Nov2020      | 46 | 0.00077754 | -1.0007435 | 0.0004217  | 0.04057636 | 0.22214882 | 7.25446428 |
| 9Apr-29Nov2020      | 45 |            |            |            |            |            |            |
| 9Apr-29Nov2020      | 44 | 0.00095701 | -0.5263248 | 0.00026299 | 0.03433266 | 0.00328468 | 0.00010789 |
| 9Apr-29Nov2020      | 43 | 0.00086401 | -0.2794836 | 0.00047922 | 0.04636204 | 0.03675819 | 0.05269541 |
| 9Apr-29Nov2020      | 42 |            |            |            |            |            |            |
| 9Apr-29Nov2020      | 41 | -0.0002027 | -0.3298592 | 0.00043442 | 0.03673998 | 0.03954837 | 0.06881924 |
| 9Apr-29Nov2020      | 40 | 0.00064555 | -0.110961  | 0.00061007 | 0.05069183 | 0.00856642 | 0.00080722 |
| 9Apr-29Nov2020      | 39 |            |            |            |            |            |            |
| 9Apr-29Nov2020      | 38 |            |            |            |            |            |            |
| 9Apr-29Nov2020      | 37 | 0.00073882 | -0.1670051 | 0.00144703 | 0.01530821 | 0.00373621 | 2.79E-05   |
| 9Apr-29Nov2020      | 36 |            |            |            |            |            |            |
| 9Apr-29Nov2020      | 35 | -0.0005483 | -0.1567405 | 0.00030376 | 0.02528017 | 0.11144467 | 1.42829013 |
| 9Apr-29Nov2020      | 34 | 0.0003731  | -0.712921  | 0.00024788 | 0.02347354 | 0.05541752 | 0.25183028 |
| 9Apr-29Nov2020      | 33 | 0.00053551 | -1.009841  | 0.00108617 | 0.02806765 | 0.0170013  | 0.00346853 |
| 9Apr-29Nov2020      | 32 | 0.00178464 | -0.7270081 | 0.00042908 | 0.03378403 | 0.19934374 | 5.36461998 |
| 9Apr-29Nov2020      | 31 | -0.0004839 | -0.3285433 | 0.0002913  | 0.02879073 | 0.14128998 | 2.77483731 |
| 9Apr-29Nov2020      | 30 | -0.0009761 | -0.1572179 | 0.00018572 | 0.01494431 | 0.08912398 | 1.09614562 |
| 9Apr-29Nov2020      | 29 | -0.0009741 | -1.037528  | 0.00198583 | 0.03244877 | 0.02184416 | 0.0042945  |

|                |    |            |            |            |            |            |            |
|----------------|----|------------|------------|------------|------------|------------|------------|
| 9Apr-29Nov2020 | 28 |            |            |            |            |            |            |
| 9Apr-29Nov2020 | 27 |            |            |            |            |            |            |
| 9Apr-29Nov2020 | 26 | -0.0018491 | -1.2013016 | 0.00019078 | 0.00808227 | 0.03529417 | 0.08968886 |
| 9Apr-29Nov2020 | 25 | 0.00024373 | -1.5855562 | 0.00067787 | 0.0208493  | 0.02204899 | 0.01020932 |
| 9Apr-29Nov2020 | 24 | -0.00027   | -1.1161198 | 0.00036994 | 0.00777014 | 0.02435738 | 0.02076487 |
| 9Apr-29Nov2020 | 23 |            |            |            |            |            |            |
| 9Apr-29Nov2020 | 22 |            |            |            |            |            |            |
| 9Apr-29Nov2020 | 21 |            |            |            |            |            |            |
| 9Apr-29Nov2020 | 20 | 0.0018012  | 2.13718048 | 0.00213991 | 0.09239265 | 0.03004774 | 0.00993153 |
| 9Apr-29Nov2020 | 19 |            |            |            |            |            |            |
| 9Apr-29Nov2020 | 18 |            |            |            |            |            |            |
| 9Apr-29Nov2020 | 17 |            |            |            |            |            |            |
| 9Apr-29Nov2020 | 16 |            |            |            |            |            |            |
| 9Apr-29Nov2020 | 15 |            |            |            |            |            |            |
| 9Apr-29Nov2020 | 14 |            |            |            |            |            |            |
| 9Apr-29Nov2020 | 13 |            |            |            |            |            |            |
| 9Apr-29Nov2020 | 12 |            |            |            |            |            |            |
| 9Apr-29Nov2020 | 11 |            |            |            |            |            |            |
| 9Apr-29Nov2020 | 10 |            |            |            |            |            |            |
| 9Apr-29Nov2020 | 9  |            |            |            |            |            |            |
| 9Apr-29Nov2020 | 8  |            |            |            |            |            |            |
| 9Apr-29Nov2020 | 7  |            |            |            |            |            |            |
| 9Apr-29Nov2020 | 6  |            |            |            |            |            |            |
| 9Apr-29Nov2020 | 5  |            |            |            |            |            |            |
| 9Apr-29Nov2020 | 4  |            |            |            |            |            |            |
| 9Apr-29Nov2020 | 3  |            |            |            |            |            |            |
| 9Apr-29Nov2020 | 2  |            |            |            |            |            |            |
| 9Apr-29Nov2020 | 1  |            |            |            |            |            |            |

Table S2: Compiled regression parameters cont. (eastern fault block)

| Pair                 | box | right_slope | right_int  | right_SlopeSD | right_IntSD | right_RegSD | right_sumsq |
|----------------------|-----|-------------|------------|---------------|-------------|-------------|-------------|
| 9Apr2020-2Apr2021(a) | 51  | -0.0011502  | 1.80004122 | 0.00028311    | 0.03561554  | 0.05132156  | 0.18700705  |
| 9Apr2020-2Apr2021(a) | 50  | -0.0023468  | 1.07174221 | 0.00024522    | 0.0096809   | 0.04086672  | 0.11189593  |
| 9Apr2020-2Apr2021(a) | 49  | -0.0011739  | 0.98369609 | 0.00047756    | 0.04421907  | 0.28250317  | 12.6894785  |
| 9Apr2020-2Apr2021(a) | 48  | 0.0005263   | 0.74361822 | 0.00026334    | 0.0243839   | 0.15578187  | 3.85861052  |
| 9Apr2020-2Apr2021(a) | 47  | -0.0005014  | 1.06190602 | 0.00130303    | 0.06140499  | 0.0508181   | 0.0619795   |
| 9Apr2020-2Apr2021(a) | 46  | 0.00247696  | 0.87886459 | 0.00034874    | 0.03229072  | 0.20629629  | 6.76674711  |
| 9Apr2020-2Apr2021(a) | 45  | 0.00057152  | 1.02295754 | 0.00100942    | 0.03363665  | 0.09189373  | 0.37155616  |
| 9Apr2020-2Apr2021(a) | 44  | 0.00088674  | 0.6415488  | 0.00118049    | 0.04329754  | 0.0147443   | 0.00217394  |
| 9Apr2020-2Apr2021(a) | 43  | 0.00075618  | 0.88589469 | 0.00042888    | 0.04312075  | 0.19708     | 5.20463027  |
| 9Apr2020-2Apr2021(a) | 42  | -1.75E-05   | 1.55587588 | 0.00068319    | 0.04706417  | 0.08117231  | 0.34921402  |
| 9Apr2020-2Apr2021(a) | 41  | -0.0029161  | 0.73723753 | 0.00175726    | 0.23866356  | 0.18655901  | 1.70540903  |
| 9Apr2020-2Apr2021(a) | 40  | -0.0024096  | 1.01378024 | 0.00093607    | 0.12583009  | 0.10821636  | 0.60896056  |
| 9Apr2020-2Apr2021(a) | 39  | 0.00228451  | 1.58644203 | 0.00056936    | 0.05288265  | 0.33367812  | 17.5918916  |
| 9Apr2020-2Apr2021(a) | 38  | -0.0002976  | 1.14443314 | 0.00204521    | 0.27967986  | 0.20456387  | 1.96677961  |
| 9Apr2020-2Apr2021(a) | 37  | 0.00149452  | 0.50407627 | 0.000278      | 0.02574069  | 0.16444999  | 4.29996395  |
| 9Apr2020-2Apr2021(a) | 36  | 0.00358998  | 0.42116361 | 0.00059454    | 0.03997804  | 0.03452284  | 0.03813846  |
| 9Apr2020-2Apr2021(a) | 35  |             |            |               |             |             |             |
| 9Apr2020-2Apr2021(a) | 34  | 0.00049034  | 0.30266743 | 0.00033722    | 0.03122384  | 0.19948032  | 6.32699134  |
| 9Apr2020-2Apr2021(a) | 33  | 0.00521617  | 0.53218898 | 0.00153325    | 0.07844946  | 0.06673881  | 0.1158058   |
| 9Apr2020-2Apr2021(a) | 32  | 0.00028936  | -0.5543441 | 0.00107179    | 0.02601164  | 0.06497388  | 0.13931297  |
| 9Apr2020-2Apr2021(a) | 31  | 0.00158774  | -0.2123433 | 0.00072763    | 0.02678685  | 0.06199836  | 0.16143947  |
| 9Apr2020-2Apr2021(a) | 30  |             |            |               |             |             |             |
| 9Apr2020-2Apr2021(a) | 29  |             |            |               |             |             |             |
| 9Apr2020-2Apr2021(a) | 28  |             |            |               |             |             |             |
| 9Apr2020-2Apr2021(a) | 27  |             |            |               |             |             |             |
| 9Apr2020-2Apr2021(a) | 26  |             |            |               |             |             |             |
| 9Apr2020-2Apr2021(a) | 25  |             |            |               |             |             |             |
| 9Apr2020-2Apr2021(a) | 24  | -0.0007114  | 0.89994308 | 0.00079699    | 0.03838948  | 0.07971556  | 0.29866478  |
| 9Apr2020-2Apr2021(a) | 23  | -0.0005639  | 0.80859006 | 0.00080601    | 0.04413733  | 0.04080262  | 0.04828075  |
| 9Apr2020-2Apr2021(a) | 22  |             |            |               |             |             |             |
| 9Apr2020-2Apr2021(a) | 21  | 0.00257242  | 0.32424437 | 0.00036232    | 0.01991416  | 0.0219642   | 0.01592006  |
| 9Apr2020-2Apr2021(a) | 20  |             |            |               |             |             |             |
| 9Apr2020-2Apr2021(a) | 19  |             |            |               |             |             |             |
| 9Apr2020-2Apr2021(a) | 18  | 0.00224879  | 0.27754387 | 0.00140137    | 0.03367672  | 0.07784247  | 0.18784293  |
| 9Apr2020-2Apr2021(a) | 17  |             |            |               |             |             |             |
| 9Apr2020-2Apr2021(a) | 16  |             |            |               |             |             |             |
| 9Apr2020-2Apr2021(a) | 15  | -0.0015808  | 0.96062606 | 0.00052082    | 0.03394086  | 0.17899983  | 3.52450346  |
| 9Apr2020-2Apr2021(a) | 14  | 1.21E-05    | 0.36921684 | 0.0020859     | 0.03984649  | 0.03972346  | 0.02209134  |
| 9Apr2020-2Apr2021(a) | 13  |             |            |               |             |             |             |
| 9Apr2020-2Apr2021(a) | 12  |             |            |               |             |             |             |
| 9Apr2020-2Apr2021(a) | 11  | -5.10E-05   | 0.36711569 | 0.00120672    | 0.0267392   | 0.08592344  | 0.27316501  |
| 9Apr2020-2Apr2021(a) | 10  |             |            |               |             |             |             |
| 9Apr2020-2Apr2021(a) | 9   |             |            |               |             |             |             |
| 9Apr2020-2Apr2021(a) | 8   |             |            |               |             |             |             |
| 9Apr2020-2Apr2021(a) | 7   |             |            |               |             |             |             |
| 9Apr2020-2Apr2021(a) | 6   |             |            |               |             |             |             |
| 9Apr2020-2Apr2021(a) | 5   |             |            |               |             |             |             |
| 9Apr2020-2Apr2021(a) | 4   |             |            |               |             |             |             |
| 9Apr2020-2Apr2021(a) | 3   |             |            |               |             |             |             |
| 9Apr2020-2Apr2021(a) | 2   |             |            |               |             |             |             |
| 9Apr2020-2Apr2021(a) | 1   |             |            |               |             |             |             |
| 9Apr2020-2Apr2021(b) | 51  | 0.00067134  | -0.117995  | 0.00048176    | 0.01714327  | 0.00333776  | 6.68E-05    |
| 9Apr2020-2Apr2021(b) | 50  | 0.00066323  | -0.5050781 | 0.00160945    | 0.08600256  | 0.09345422  | 0.27947815  |
| 9Apr2020-2Apr2021(b) | 49  |             |            |               |             |             |             |

|                      |    |            |            |            |            |            |            |
|----------------------|----|------------|------------|------------|------------|------------|------------|
| 9Apr2020-2Apr2021(b) | 48 | 0.00273664 | -0.5709096 | 0.00011122 | 0.01029775 | 0.06578942 | 0.68819135 |
| 9Apr2020-2Apr2021(b) | 47 | 0.00071178 | -0.3902947 | 0.00028675 | 0.03581938 | 0.05412247 | 0.21383462 |
| 9Apr2020-2Apr2021(b) | 46 | 0.0008917  | -0.6228292 | 0.00032551 | 0.03341691 | 0.13981261 | 2.50208856 |
| 9Apr2020-2Apr2021(b) | 45 |            |            |            |            |            |            |
| 9Apr2020-2Apr2021(b) | 44 | 0.00143416 | -0.4046229 | 0.00074494 | 0.03577599 | 0.12684092 | 1.09402602 |
| 9Apr2020-2Apr2021(b) | 43 | 0.00377306 | -0.5724431 | 0.00025024 | 0.0231706  | 0.14803043 | 3.48416851 |
| 9Apr2020-2Apr2021(b) | 42 | -0.001601  | -0.2176913 | 0.00022044 | 0.02239477 | 0.09797058 | 1.25736865 |
| 9Apr2020-2Apr2021(b) | 41 | -0.0016377 | 0.31243706 | 0.0019894  | 0.06306728 | 0.12060068 | 0.47996931 |
| 9Apr2020-2Apr2021(b) | 40 | 0.00187338 | 0.16395031 | 0.00148446 | 0.02346744 | 0.06461518 | 0.10855314 |
| 9Apr2020-2Apr2021(b) | 39 | 0.00205243 | -0.1722367 | 0.00034213 | 0.03167856 | 0.20238536 | 6.51261363 |
| 9Apr2020-2Apr2021(b) | 38 | -4.62E-06  | -0.0124683 | 0.00052271 | 0.04115653 | 0.24284539 | 7.9614744  |
| 9Apr2020-2Apr2021(b) | 37 | -0.0005436 | -0.4316913 | 0.00041658 | 0.0385726  | 0.24642947 | 9.65566988 |
| 9Apr2020-2Apr2021(b) | 36 | 0.00107501 | -0.5676634 | 0.00023947 | 0.02537712 | 0.09238976 | 1.01576829 |
| 9Apr2020-2Apr2021(b) | 35 | 0.0003828  | -0.4935924 | 0.00085432 | 0.05198302 | 0.02602045 | 0.01354128 |
| 9Apr2020-2Apr2021(b) | 34 | 0.00340609 | -0.6585281 | 0.00056454 | 0.04734645 | 0.23140662 | 6.6400788  |
| 9Apr2020-2Apr2021(b) | 33 | 0.00490343 | -1.0486861 | 0.00059761 | 0.05788501 | 0.30851475 | 13.8012963 |
| 9Apr2020-2Apr2021(b) | 32 |            |            |            |            |            |            |
| 9Apr2020-2Apr2021(b) | 31 | 0.00694735 | 0.00146122 | 0.00033469 | 0.03098994 | 0.19798596 | 6.23255173 |
| 9Apr2020-2Apr2021(b) | 30 |            |            |            |            |            |            |
| 9Apr2020-2Apr2021(b) | 29 | -0.0003062 | 0.31819128 | 0.00050563 | 0.0225884  | 0.10119288 | 0.77823998 |
| 9Apr2020-2Apr2021(b) | 28 | 0.00235287 | 0.44849801 | 0.00081464 | 0.01908758 | 0.01410994 | 0.00258818 |
| 9Apr2020-2Apr2021(b) | 27 |            |            |            |            |            |            |
| 9Apr2020-2Apr2021(b) | 26 |            |            |            |            |            |            |
| 9Apr2020-2Apr2021(b) | 25 | 0.00283158 | 0.35728057 | 0.00079314 | 0.06846199 | 0.37251639 | 18.8725107 |
| 9Apr2020-2Apr2021(b) | 24 |            |            |            |            |            |            |
| 9Apr2020-2Apr2021(b) | 23 |            |            |            |            |            |            |
| 9Apr2020-2Apr2021(b) | 22 |            |            |            |            |            |            |
| 9Apr2020-2Apr2021(b) | 21 |            |            |            |            |            |            |
| 9Apr2020-2Apr2021(b) | 20 |            |            |            |            |            |            |
| 9Apr2020-2Apr2021(b) | 19 | 0.0063276  | 1.89681688 | 0.00048827 | 0.05079655 | 0.03086513 | 0.03239032 |
| 9Apr2020-2Apr2021(b) | 18 | 0.02727986 | 1.3091367  | 0.00057296 | 0.02394239 | 0.10386584 | 0.76595597 |
| 9Apr2020-2Apr2021(b) | 17 | 0.02447772 | 0.90436704 | 0.0008086  | 0.09138791 | 0.24518517 | 6.07169266 |
| 9Apr2020-2Apr2021(b) | 16 | 0.01838238 | 0.60082993 | 0.00027807 | 0.02574697 | 0.16449009 | 4.30206129 |
| 9Apr2020-2Apr2021(b) | 15 |            |            |            |            |            |            |
| 9Apr2020-2Apr2021(b) | 14 |            |            |            |            |            |            |
| 9Apr2020-2Apr2021(b) | 13 |            |            |            |            |            |            |
| 9Apr2020-2Apr2021(b) | 12 |            |            |            |            |            |            |
| 9Apr2020-2Apr2021(b) | 11 |            |            |            |            |            |            |
| 9Apr2020-2Apr2021(b) | 10 |            |            |            |            |            |            |
| 9Apr2020-2Apr2021(b) | 9  |            |            |            |            |            |            |
| 9Apr2020-2Apr2021(b) | 8  |            |            |            |            |            |            |
| 9Apr2020-2Apr2021(b) | 7  |            |            |            |            |            |            |
| 9Apr2020-2Apr2021(b) | 6  |            |            |            |            |            |            |
| 9Apr2020-2Apr2021(b) | 5  |            |            |            |            |            |            |
| 9Apr2020-2Apr2021(b) | 4  |            |            |            |            |            |            |
| 9Apr2020-2Apr2021(b) | 3  |            |            |            |            |            |            |
| 9Apr2020-2Apr2021(b) | 2  |            |            |            |            |            |            |
| 9Apr2020-2Apr2021(b) | 1  |            |            |            |            |            |            |
| 9Apr2020-11Apr2021   | 51 | 0.00364217 | 1.45753743 | 0.00132641 | 0.08257514 | 0.03253524 | 0.01799522 |
| 9Apr2020-11Apr2021   | 50 | 0.00097539 | -0.4032546 | 0.00077726 | 0.02965594 | 0.05324681 | 0.10206801 |
| 9Apr2020-11Apr2021   | 49 |            |            |            |            |            |            |
| 9Apr2020-11Apr2021   | 48 | 0.00298769 | -0.3133979 | 0.00012929 | 0.0049546  | 0.02061985 | 0.02763658 |
| 9Apr2020-11Apr2021   | 47 | 0.00238049 | -0.4487936 | 0.00015166 | 0.0140424  | 0.08971296 | 1.27969788 |
| 9Apr2020-11Apr2021   | 46 | 0.00309576 | -0.7224269 | 0.00025585 | 0.02368967 | 0.15134659 | 3.64202043 |
| 9Apr2020-11Apr2021   | 45 |            |            |            |            |            |            |
| 9Apr2020-11Apr2021   | 44 | 0.00996725 | -1.3911327 | 0.00046942 | 0.04346495 | 0.27768526 | 12.2603475 |



|                    |    |            |            |            |            |            |            |
|--------------------|----|------------|------------|------------|------------|------------|------------|
| 9Apr2020-11Apr2021 | 43 | 0.00740266 | -1.6291552 | 0.00116987 | 0.03698536 | 0.03326431 | 0.02102377 |
| 9Apr2020-11Apr2021 | 42 |            |            |            |            |            |            |
| 9Apr2020-11Apr2021 | 41 | 0.00351112 | -3.0358797 | 0.00064056 | 0.0909186  | 0.04388199 | 0.06932264 |
| 9Apr2020-11Apr2021 | 40 |            |            |            |            |            |            |
| 9Apr2020-11Apr2021 | 39 | 0.00402826 | -2.5848129 | 0.00059341 | 0.05323301 | 0.33484291 | 17.2664453 |
| 9Apr2020-11Apr2021 | 38 | 0.0012766  | -3.5469529 | 0.00233245 | 0.31678436 | 0.24762464 | 3.00458016 |
| 9Apr2020-11Apr2021 | 37 |            |            |            |            |            |            |
| 9Apr2020-11Apr2021 | 36 |            |            |            |            |            |            |
| 9Apr2020-11Apr2021 | 35 |            |            |            |            |            |            |
| 9Apr2020-11Apr2021 | 34 |            |            |            |            |            |            |
| 9Apr2020-11Apr2021 | 33 |            |            |            |            |            |            |
| 9Apr2020-11Apr2021 | 32 |            |            |            |            |            |            |
| 9Apr2020-11Apr2021 | 31 |            |            |            |            |            |            |
| 9Apr2020-11Apr2021 | 30 |            |            |            |            |            |            |
| 9Apr2020-11Apr2021 | 29 |            |            |            |            |            |            |
| 9Apr2020-11Apr2021 | 28 |            |            |            |            |            |            |
| 9Apr2020-11Apr2021 | 27 |            |            |            |            |            |            |
| 9Apr2020-11Apr2021 | 26 |            |            |            |            |            |            |
| 9Apr2020-11Apr2021 | 25 |            |            |            |            |            |            |
| 9Apr2020-11Apr2021 | 24 |            |            |            |            |            |            |
| 9Apr2020-11Apr2021 | 23 |            |            |            |            |            |            |
| 9Apr2020-11Apr2021 | 22 |            |            |            |            |            |            |
| 9Apr2020-11Apr2021 | 21 |            |            |            |            |            |            |
| 9Apr2020-11Apr2021 | 20 |            |            |            |            |            |            |
| 9Apr2020-11Apr2021 | 19 |            |            |            |            |            |            |
| 9Apr2020-11Apr2021 | 18 |            |            |            |            |            |            |
| 9Apr2020-11Apr2021 | 17 |            |            |            |            |            |            |
| 9Apr2020-11Apr2021 | 16 |            |            |            |            |            |            |
| 9Apr2020-11Apr2021 | 15 |            |            |            |            |            |            |
| 9Apr2020-11Apr2021 | 14 |            |            |            |            |            |            |
| 9Apr2020-11Apr2021 | 13 |            |            |            |            |            |            |
| 9Apr2020-11Apr2021 | 12 |            |            |            |            |            |            |
| 9Apr2020-11Apr2021 | 11 |            |            |            |            |            |            |
| 9Apr2020-11Apr2021 | 10 |            |            |            |            |            |            |
| 9Apr2020-11Apr2021 | 9  |            |            |            |            |            |            |
| 9Apr2020-11Apr2021 | 8  |            |            |            |            |            |            |
| 9Apr2020-11Apr2021 | 7  |            |            |            |            |            |            |
| 9Apr2020-11Apr2021 | 6  |            |            |            |            |            |            |
| 9Apr2020-11Apr2021 | 5  |            |            |            |            |            |            |
| 9Apr2020-11Apr2021 | 4  |            |            |            |            |            |            |
| 9Apr2020-11Apr2021 | 3  |            |            |            |            |            |            |
| 9Apr2020-11Apr2021 | 2  |            |            |            |            |            |            |
| 9Apr2020-11Apr2021 | 1  |            |            |            |            |            |            |
| 9Apr2020-12Apr2021 | 51 | -0.003005  | 1.97144723 | 0.00139587 | 0.0027625  | 0.00360411 | 2.60E-05   |
| 9Apr2020-12Apr2021 | 50 | 0.00230093 | 1.49708835 | 0.00057135 | 0.07947195 | 0.04868246 | 0.09953925 |
| 9Apr2020-12Apr2021 | 49 |            |            |            |            |            |            |
| 9Apr2020-12Apr2021 | 48 |            |            |            |            |            |            |
| 9Apr2020-12Apr2021 | 47 |            |            |            |            |            |            |
| 9Apr2020-12Apr2021 | 46 | -0.000891  | 1.61939157 | 0.00010327 | 0.00764424 | 0.00497926 | 0.00069421 |
| 9Apr2020-12Apr2021 | 45 |            |            |            |            |            |            |
| 9Apr2020-12Apr2021 | 44 | 0.00117201 | 1.77432383 | 0.00034213 | 0.03463734 | 0.15376904 | 3.12112926 |
| 9Apr2020-12Apr2021 | 43 | 0.00217602 | 1.59599575 | 0.00039009 | 0.025985   | 0.14129475 | 2.27591957 |
| 9Apr2020-12Apr2021 | 42 | 0.00096412 | 1.55307424 | 0.00038698 | 0.035832   | 0.2289205  | 8.33233084 |
| 9Apr2020-12Apr2021 | 41 | 0.00062348 | 1.50475428 | 0.00051389 | 0.05849916 | 0.15132235 | 2.26694704 |
| 9Apr2020-12Apr2021 | 40 | 0.00345657 | 1.13873495 | 0.00019942 | 0.01846508 | 0.11796817 | 2.2127218  |
| 9Apr2020-12Apr2021 | 39 | 0.00074236 | 0.77217399 | 0.00102895 | 0.05163156 | 0.04478793 | 0.05215492 |

|                     |    |            |            |            |            |            |            |
|---------------------|----|------------|------------|------------|------------|------------|------------|
| 9Apr2020-12Apr2021  | 38 | -0.0016771 | 0.43945987 | 0.00085029 | 0.04150339 | 0.12961695 | 1.05843488 |
| 9Apr2020-12Apr2021  | 37 |            |            |            |            |            |            |
| 9Apr2020-12Apr2021  | 36 |            |            |            |            |            |            |
| 9Apr2020-12Apr2021  | 35 | 0.00035547 | -2.3388967 | 0.0004208  | 0.0313153  | 0.09914027 | 0.8354474  |
| 9Apr2020-12Apr2021  | 34 |            |            |            |            |            |            |
| 9Apr2020-12Apr2021  | 33 |            |            |            |            |            |            |
| 9Apr2020-12Apr2021  | 32 | 0.00033052 | -1.7791767 | 0.00032002 | 0.03403398 | 0.12194385 | 1.75469569 |
| 9Apr2020-12Apr2021  | 31 | 0.00683397 | -1.3312776 | 0.00038039 | 0.03319249 | 0.17288047 | 3.97505837 |
| 9Apr2020-12Apr2021  | 30 | -0.0007945 | -0.2189194 | 0.00058702 | 0.01817624 | 0.01329567 | 0.0028284  |
| 9Apr2020-12Apr2021  | 29 | -0.0002062 | -0.2157074 | 0.00051314 | 0.01759138 | 0.06941612 | 0.27947869 |
| 9Apr2020-12Apr2021  | 28 | 0.00134029 | -0.1874114 | 0.00088661 | 0.01772113 | 0.02521001 | 0.01207535 |
| 9Apr2020-12Apr2021  | 27 | 0.01150314 | -0.3228691 | 0.00027276 | 0.02352301 | 0.14513131 | 3.11733853 |
| 9Apr2020-12Apr2021  | 26 |            |            |            |            |            |            |
| 9Apr2020-12Apr2021  | 25 |            |            |            |            |            |            |
| 9Apr2020-12Apr2021  | 24 |            |            |            |            |            |            |
| 9Apr2020-12Apr2021  | 23 | -0.0034509 | 2.04233093 | 0.00049118 | 0.0154273  | 0.01022671 | 0.00156878 |
| 9Apr2020-12Apr2021  | 22 |            |            |            |            |            |            |
| 9Apr2020-12Apr2021  | 21 | 0.00013798 | 2.63070659 | 0.00317212 | 0.08266818 | 0.11673101 | 0.31340098 |
| 9Apr2020-12Apr2021  | 20 |            |            |            |            |            |            |
| 9Apr2020-12Apr2021  | 19 | 0.00556089 | 1.96480354 | 0.00058927 | 0.02258256 | 0.09398321 | 0.5741348  |
| 9Apr2020-12Apr2021  | 18 | 0.00308933 | 2.11284689 | 0.00136996 | 0.05753429 | 0.09384984 | 0.31708055 |
| 9Apr2020-12Apr2021  | 17 |            |            |            |            |            |            |
| 9Apr2020-12Apr2021  | 16 |            |            |            |            |            |            |
| 9Apr2020-12Apr2021  | 15 | 0.00411937 | 2.70355196 | 0.00198973 | 0.20514289 | 0.13630765 | 0.66887189 |
| 9Apr2020-12Apr2021  | 14 | 0.00060595 | 2.26053354 | 0.00110319 | 0.00281258 | 0.00390035 | 4.56E-05   |
| 9Apr2020-12Apr2021  | 13 |            |            |            |            |            |            |
| 9Apr2020-12Apr2021  | 12 |            |            |            |            |            |            |
| 9Apr2020-12Apr2021  | 11 |            |            |            |            |            |            |
| 9Apr2020-12Apr2021  | 10 |            |            |            |            |            |            |
| 9Apr2020-12Apr2021  | 9  |            |            |            |            |            |            |
| 9Apr2020-12Apr2021  | 8  |            |            |            |            |            |            |
| 9Apr2020-12Apr2021  | 7  |            |            |            |            |            |            |
| 9Apr2020-12Apr2021  | 6  |            |            |            |            |            |            |
| 9Apr2020-12Apr2021  | 5  |            |            |            |            |            |            |
| 9Apr2020-12Apr2021  | 4  |            |            |            |            |            |            |
| 9Apr2020-12Apr2021  | 3  |            |            |            |            |            |            |
| 9Apr2020-12Apr2021  | 2  |            |            |            |            |            |            |
| 9Apr2020-12Apr2021  | 1  |            |            |            |            |            |            |
| 28Nov2019-29Nov2020 | 51 | -0.0003812 | 0.07638153 | 8.65E-05   | 0.00998949 | 0.0239785  | 0.054622   |
| 28Nov2019-29Nov2020 | 50 | -0.0017416 | -0.1100425 | 0.00272422 | 0.05052681 | 0.04718492 | 0.02894342 |
| 28Nov2019-29Nov2020 | 49 |            |            |            |            |            |            |
| 28Nov2019-29Nov2020 | 48 | 0.00638663 | 0.93735823 | 0.00044186 | 0.0161682  | 0.06581589 | 0.26856737 |
| 28Nov2019-29Nov2020 | 47 |            |            |            |            |            |            |
| 28Nov2019-29Nov2020 | 46 | -9.21E-05  | 0.34024625 | 0.00066772 | 0.01286832 | 0.03877157 | 0.04810351 |
| 28Nov2019-29Nov2020 | 45 | 0.0019387  | 0.20142572 | 0.00010414 | 0.00209044 | 0.00198328 | 5.51E-05   |
| 28Nov2019-29Nov2020 | 44 | 0.00422387 | 0.08488022 | 0.00026662 | 0.0246872  | 0.15771953 | 3.95519639 |
| 28Nov2019-29Nov2020 | 43 | 0.00551413 | 0.48807463 | 0.00046021 | 0.00706986 | 0.00506229 | 0.00023064 |
| 28Nov2019-29Nov2020 | 42 | -0.0014105 | 0.72661048 | 0.00021988 | 0.02276507 | 0.07355976 | 0.58439209 |
| 28Nov2019-29Nov2020 | 41 |            |            |            |            |            |            |
| 28Nov2019-29Nov2020 | 40 |            |            |            |            |            |            |
| 28Nov2019-29Nov2020 | 39 |            |            |            |            |            |            |
| 28Nov2019-29Nov2020 | 38 |            |            |            |            |            |            |
| 28Nov2019-29Nov2020 | 37 | -0.005584  | 0.9533322  | 0.00163655 | 0.04334531 | 0.03407398 | 0.01741554 |
| 28Nov2019-29Nov2020 | 36 | -0.0003148 | -0.4069287 | 0.00427692 | 0.24033683 | 0.20622577 | 1.19081388 |
| 28Nov2019-29Nov2020 | 35 | -0.0005557 | 0.30179282 | 0.00246464 | 0.14103452 | 0.05131537 | 0.03949901 |
| 28Nov2019-29Nov2020 | 34 | 0.00117498 | -0.1707013 | 0.00019481 | 0.02035785 | 0.03317027 | 0.07481813 |

|                     |    |            |            |            |            |            |            |
|---------------------|----|------------|------------|------------|------------|------------|------------|
| 28Nov2019-29Nov2020 | 33 |            |            |            |            |            |            |
| 28Nov2019-29Nov2020 | 32 |            |            |            |            |            |            |
| 28Nov2019-29Nov2020 | 31 |            |            |            |            |            |            |
| 28Nov2019-29Nov2020 | 30 |            |            |            |            |            |            |
| 28Nov2019-29Nov2020 | 29 | -0.0003556 | -1.4114933 | 0.00237407 | 0.02385915 | 0.04112017 | 0.02198128 |
| 28Nov2019-29Nov2020 | 28 | -0.0001445 | -1.4521628 | 0.000823   | 0.01435342 | 0.01155623 | 0.00146901 |
| 28Nov2019-29Nov2020 | 27 |            |            |            |            |            |            |
| 28Nov2019-29Nov2020 | 26 | -0.0007052 | -1.5777348 | 0.00095827 | 0.0444796  | 0.02724756 | 0.01410616 |
| 28Nov2019-29Nov2020 | 25 | 0.00049091 | -1.7547919 | 0.00191814 | 0.10847689 | 0.01328929 | 0.00105963 |
| 28Nov2019-29Nov2020 | 24 |            |            |            |            |            |            |
| 28Nov2019-29Nov2020 | 23 | -0.0005081 | -0.8480535 | 0.00168084 | 0.07339923 | 0.25036387 | 3.88628805 |
| 28Nov2019-29Nov2020 | 22 |            |            |            |            |            |            |
| 28Nov2019-29Nov2020 | 21 |            |            |            |            |            |            |
| 28Nov2019-29Nov2020 | 20 |            |            |            |            |            |            |
| 28Nov2019-29Nov2020 | 19 | 0.00025856 | -0.459075  | 0.0008193  | 0.02572218 | 0.09734392 | 0.50221943 |
| 28Nov2019-29Nov2020 | 18 | -0.0002991 | -0.567502  | 0.00181427 | 0.07816633 | 0.06284809 | 0.08689742 |
| 28Nov2019-29Nov2020 | 17 |            |            |            |            |            |            |
| 28Nov2019-29Nov2020 | 16 |            |            |            |            |            |            |
| 28Nov2019-29Nov2020 | 15 |            |            |            |            |            |            |
| 28Nov2019-29Nov2020 | 14 |            |            |            |            |            |            |
| 28Nov2019-29Nov2020 | 13 |            |            |            |            |            |            |
| 28Nov2019-29Nov2020 | 12 |            |            |            |            |            |            |
| 28Nov2019-29Nov2020 | 11 |            |            |            |            |            |            |
| 28Nov2019-29Nov2020 | 10 |            |            |            |            |            |            |
| 28Nov2019-29Nov2020 | 9  |            |            |            |            |            |            |
| 28Nov2019-29Nov2020 | 8  |            |            |            |            |            |            |
| 28Nov2019-29Nov2020 | 7  |            |            |            |            |            |            |
| 28Nov2019-29Nov2020 | 6  |            |            |            |            |            |            |
| 28Nov2019-29Nov2020 | 5  |            |            |            |            |            |            |
| 28Nov2019-29Nov2020 | 4  |            |            |            |            |            |            |
| 28Nov2019-29Nov2020 | 3  |            |            |            |            |            |            |
| 28Nov2019-29Nov2020 | 2  |            |            |            |            |            |            |
| 28Nov2019-29Nov2020 | 1  |            |            |            |            |            |            |
| 9Apr-29Nov2020      | 51 |            |            |            |            |            |            |
| 9Apr-29Nov2020      | 50 | 0.00112901 | -1.5549769 | 0.00040996 | 0.06094747 | 0.0142013  | 0.00443689 |
| 9Apr-29Nov2020      | 49 | -6.21E-05  | -1.0627617 | 0.00055953 | 0.02165736 | 0.02059025 | 0.00975104 |
| 9Apr-29Nov2020      | 48 |            |            |            |            |            |            |
| 9Apr-29Nov2020      | 47 |            |            |            |            |            |            |
| 9Apr-29Nov2020      | 46 | 0.00076102 | -0.5471809 | 0.00012269 | 0.00257694 | 0.00807802 | 0.00228391 |
| 9Apr-29Nov2020      | 45 |            |            |            |            |            |            |
| 9Apr-29Nov2020      | 44 | 0.00124965 | -0.0205992 | 0.00058261 | 0.04849941 | 0.03991195 | 0.05734671 |
| 9Apr-29Nov2020      | 43 | 0.00210097 | 0.22577754 | 0.00344926 | 0.14958269 | 0.08460643 | 0.12169023 |
| 9Apr-29Nov2020      | 42 |            |            |            |            |            |            |
| 9Apr-29Nov2020      | 41 | 7.31E-05   | 0.16648013 | 0.00030605 | 0.04015588 | 0.04243543 | 0.10624517 |
| 9Apr-29Nov2020      | 40 | -7.72E-05  | 0.39194639 | 0.00018793 | 0.02170286 | 0.05209495 | 0.25781896 |
| 9Apr-29Nov2020      | 39 |            |            |            |            |            |            |
| 9Apr-29Nov2020      | 38 |            |            |            |            |            |            |
| 9Apr-29Nov2020      | 37 | 0.00081489 | 0.33751732 | 0.001088   | 0.02818329 | 0.0353894  | 0.02630061 |
| 9Apr-29Nov2020      | 36 |            |            |            |            |            |            |
| 9Apr-29Nov2020      | 35 | 0.00011262 | 0.31281561 | 0.00033543 | 0.03360873 | 0.15583518 | 3.27842156 |
| 9Apr-29Nov2020      | 34 | 0.00221162 | -0.2599512 | 0.00041086 | 0.04448017 | 0.14690158 | 2.43854848 |
| 9Apr-29Nov2020      | 33 | 0.00120918 | -0.5754046 | 0.00030924 | 0.03126814 | 0.0211847  | 0.01615649 |
| 9Apr-29Nov2020      | 32 | 0.00276497 | -0.3190495 | 0.00027451 | 0.02193131 | 0.13033217 | 2.32714714 |
| 9Apr-29Nov2020      | 31 | 0.00254425 | 0.04337623 | 0.00028897 | 0.02675625 | 0.17093814 | 4.64595564 |
| 9Apr-29Nov2020      | 30 | 0.00274063 | 0.19307827 | 0.00029103 | 0.02694699 | 0.17215669 | 4.71243045 |
| 9Apr-29Nov2020      | 29 | 0.00307992 | -0.7336942 | 0.00074298 | 0.01560543 | 0.04891897 | 0.08375728 |

|                |    |            |            |            |            |            |            |
|----------------|----|------------|------------|------------|------------|------------|------------|
| 9Apr-29Nov2020 | 28 |            |            |            |            |            |            |
| 9Apr-29Nov2020 | 27 |            |            |            |            |            |            |
| 9Apr-29Nov2020 | 26 | -0.0012153 | -0.9466443 | 0.00049241 | 0.04844836 | 0.07679188 | 0.37740755 |
| 9Apr-29Nov2020 | 25 | 0.00013858 | -1.3521922 | 0.00030509 | 0.01024764 | 0.00211369 | 2.68E-05   |
| 9Apr-29Nov2020 | 24 | -0.0008318 | -0.89487   | 0.00103403 | 0.0603826  | 0.03363392 | 0.02375605 |
| 9Apr-29Nov2020 | 23 |            |            |            |            |            |            |
| 9Apr-29Nov2020 | 22 |            |            |            |            |            |            |
| 9Apr-29Nov2020 | 21 |            |            |            |            |            |            |
| 9Apr-29Nov2020 | 20 | 0.00028991 | 2.30386621 | 0.00084388 | 0.00749658 | 0.01607061 | 0.00361571 |
| 9Apr-29Nov2020 | 19 |            |            |            |            |            |            |
| 9Apr-29Nov2020 | 18 |            |            |            |            |            |            |
| 9Apr-29Nov2020 | 17 |            |            |            |            |            |            |
| 9Apr-29Nov2020 | 16 |            |            |            |            |            |            |
| 9Apr-29Nov2020 | 15 |            |            |            |            |            |            |
| 9Apr-29Nov2020 | 14 |            |            |            |            |            |            |
| 9Apr-29Nov2020 | 13 |            |            |            |            |            |            |
| 9Apr-29Nov2020 | 12 |            |            |            |            |            |            |
| 9Apr-29Nov2020 | 11 |            |            |            |            |            |            |
| 9Apr-29Nov2020 | 10 |            |            |            |            |            |            |
| 9Apr-29Nov2020 | 9  |            |            |            |            |            |            |
| 9Apr-29Nov2020 | 8  |            |            |            |            |            |            |
| 9Apr-29Nov2020 | 7  |            |            |            |            |            |            |
| 9Apr-29Nov2020 | 6  |            |            |            |            |            |            |
| 9Apr-29Nov2020 | 5  |            |            |            |            |            |            |
| 9Apr-29Nov2020 | 4  |            |            |            |            |            |            |
| 9Apr-29Nov2020 | 3  |            |            |            |            |            |            |
| 9Apr-29Nov2020 | 2  |            |            |            |            |            |            |
| 9Apr-29Nov2020 | 1  |            |            |            |            |            |            |

Table S3: Compiled regression parameters cont. (regression limits and box data)

| Pair                 | box | valid | yOffsetAtX0 | sigmabSum  | ctr_lat    | ctr_lon    | dist_1st_m | azDeg     | xMinL | xMaxL | xMinR | xMaxR | X0 | dist_naro  |
|----------------------|-----|-------|-------------|------------|------------|------------|------------|-----------|-------|-------|-------|-------|----|------------|
| 9Apr2020-2Apr2021(a) | 51  | TRUE  | 0.33061727  | 0.05804075 | 12.0134796 | 123.999837 | 25989.123  | -36.46924 | -50   | -31   | 88    | 160   | 0  | 25002.4913 |
| 9Apr2020-2Apr2021(a) | 50  | TRUE  | 0.38786592  | 0.07370385 | 12.0171934 | 123.997069 | 25479.747  | -36.46924 | -74   | -30   | 0     | 68    | 0  | 24491.5148 |
| 9Apr2020-2Apr2021(a) | 49  | TRUE  | 0.4639638   | 0.1124486  | 12.0209071 | 123.994302 | 24970.375  | -36.46924 | -160  | -45   | 0     | 160   | 0  | 23980.5378 |
| 9Apr2020-2Apr2021(a) | 48  | TRUE  | 0.501567    | 0.06620439 | 12.0246208 | 123.991534 | 24460.999  | -36.46924 | -99   | 0     | 0     | 160   | 0  | 23469.564  |
| 9Apr2020-2Apr2021(a) | 47  | TRUE  | 0.59215153  | 0.09725738 | 12.0283346 | 123.988767 | 23951.623  | -36.46924 | -124  | -30   | 34    | 59    | 0  | 22958.578  |
| 9Apr2020-2Apr2021(a) | 46  | TRUE  | 0.42273051  | 0.08570385 | 12.032046  | 123.986001 | 23442.562  | -36.46924 | -160  | 0     | 0     | 160   | 0  | 22447.9199 |
| 9Apr2020-2Apr2021(a) | 45  | TRUE  | 0.44807044  | 0.09617988 | 12.0357351 | 123.9832   | 22933.188  | -37.01376 | -92   | -57   | 8     | 53    | 0  | 21937.0629 |
| 9Apr2020-2Apr2021(a) | 44  | TRUE  | 0.50201288  | 0.07099576 | 12.0395007 | 123.980503 | 22423.5    | -34.28242 | -160  | 0     | 31    | 42    | 0  | 21425.9031 |
| 9Apr2020-2Apr2021(a) | 43  | TRUE  | 0.51252981  | 0.08398603 | 12.0433156 | 123.977882 | 21914.122  | -34.28242 | -150  | 0     | 25    | 160   | 0  | 20915.004  |
| 9Apr2020-2Apr2021(a) | 42  | TRUE  | 0.5091425   | 0.07793473 | 12.0471305 | 123.97526  | 21404.749  | -34.28242 | -160  | 0     | 40    | 94    | 0  | 20404.1119 |
| 9Apr2020-2Apr2021(a) | 41  | TRUE  | 0.513505    | 0.27549835 | 12.0509453 | 123.972637 | 20895.373  | -34.28242 | -82   | 0     | 110   | 160   | 0  | 19893.2368 |
| 9Apr2020-2Apr2021(a) | 40  | TRUE  | 0.5158335   | 0.20828162 | 12.0547578 | 123.970017 | 20386.31   | -34.28242 | -90   | 0     | 107   | 160   | 0  | 19382.6862 |
| 9Apr2020-2Apr2021(a) | 39  | TRUE  | 0.51129583  | 0.10120106 | 12.0585726 | 123.967395 | 19876.936  | -34.28242 | -160  | -39   | 1     | 160   | 0  | 18871.8426 |
| 9Apr2020-2Apr2021(a) | 38  | TRUE  | 0.51173828  | 0.30734372 | 12.062385  | 123.964774 | 19367.875  | -34.28242 | -114  | 0     | 112   | 160   | 0  | 18361.3219 |
| 9Apr2020-2Apr2021(a) | 37  | TRUE  | 0.51038104  | 0.06747316 | 12.0661997 | 123.962152 | 18858.5    | -35.0367  | -40   | -10   | 0     | 160   | 0  | 17850.5107 |
| 9Apr2020-2Apr2021(a) | 36  | TRUE  | 0.50446906  | 0.08622232 | 12.0699288 | 123.959401 | 18348.811  | -36.55247 | -138  | -30   | 50    | 83    | 0  | 17339.2348 |
| 9Apr2020-2Apr2021(a) | 35  | FALSE |             |            | 12.0736383 | 123.956627 | 17839.436  | -36.55247 | -31   | 0     | 26    | 51    | 0  | 16828.2477 |
| 9Apr2020-2Apr2021(a) | 34  | TRUE  | 0.48961351  | 0.05543362 | 12.0773553 | 123.953864 | 17330.061  | -36.23412 | -160  | -11   | 0     | 160   | 0  | 16317.2378 |
| 9Apr2020-2Apr2021(a) | 33  | TRUE  | 0.4433971   | 0.10364311 | 12.0810798 | 123.95111  | 16820.686  | -36.23412 | -160  | 0     | 37    | 64    | 0  | 15806.2305 |
| 9Apr2020-2Apr2021(a) | 32  | TRUE  | 0.4300224   | 0.05800527 | 12.0848044 | 123.948357 | 16311.312  | -36.23412 | -57   | 0     | 5     | 39    | 0  | 15295.2102 |
| 9Apr2020-2Apr2021(a) | 31  | TRUE  | 0.370367    | 0.12202377 | 12.0885266 | 123.945606 | 15802.248  | -36.23412 | -50   | -33   | 13    | 56    | 0  | 14784.5169 |
| 9Apr2020-2Apr2021(a) | 30  | FALSE |             |            | 12.0922488 | 123.942854 | 15293.187  | -36.23412 | -159  | -95   | 34    | 83    | 0  | 14273.8133 |
| 9Apr2020-2Apr2021(a) | 29  | FALSE |             |            | 12.0959733 | 123.940101 | 14783.812  | -36.23412 | -160  | -1    | 120   | 138   | 0  | 13762.7967 |
| 9Apr2020-2Apr2021(a) | 28  | FALSE |             |            | 12.0996954 | 123.937349 | 14274.748  | -36.23412 | -136  | -130  | 0     | 160   | 0  | 13252.1006 |
| 9Apr2020-2Apr2021(a) | 27  | FALSE |             |            | 12.1034198 | 123.934595 | 13765.374  | -35.65758 | -145  | -118  | 0     | 160   | 0  | 12741.0915 |
| 9Apr2020-2Apr2021(a) | 26  | FALSE |             |            | 12.1072075 | 123.931928 | 13255.687  | -34.76896 | -160  | 0     | 0     | 56    | 0  | 12229.853  |
| 9Apr2020-2Apr2021(a) | 25  | FALSE |             |            | 12.111     | 123.929271 | 12746.311  | -34.76896 | -118  | -93   | 60    | 83    | 0  | 11718.9464 |
| 9Apr2020-2Apr2021(a) | 24  | TRUE  | 0.21597131  | 0.12122572 | 12.1147924 | 123.926615 | 12236.937  | -34.76896 | -107  | -64   | 22    | 70    | 0  | 11208.0693 |
| 9Apr2020-2Apr2021(a) | 23  | TRUE  | 0.20303197  | 0.09808602 | 12.1185848 | 123.923959 | 11727.561  | -34.76896 | -97   | -26   | 39    | 69    | 0  | 10697.2088 |
| 9Apr2020-2Apr2021(a) | 22  | FALSE |             |            | 12.1223772 | 123.921303 | 11218.185  | -34.76896 | -62   | 0     | 2     | 17    | 0  | 10186.3746 |
| 9Apr2020-2Apr2021(a) | 21  | TRUE  | 0.17020049  | 0.03977519 | 12.1261695 | 123.918647 | 10708.813  | -34.76896 | -134  | 0     | 37    | 71    | 0  | 9675.57276 |
| 9Apr2020-2Apr2021(a) | 20  | FALSE |             |            | 12.1299596 | 123.915992 | 10199.749  | -34.76896 | -160  | 0     | 87    | 100   | 0  | 9165.09916 |
| 9Apr2020-2Apr2021(a) | 19  | FALSE |             |            | 12.1337519 | 123.913335 | 9690.373   | -34.76896 | -39   | 0     | 0     | 100   | 0  | 8654.35916 |
| 9Apr2020-2Apr2021(a) | 18  | TRUE  | 0.13911565  | 0.06386273 | 12.1375442 | 123.910679 | 9180.999   | -34.76896 | -27   | -17   | 6     | 38    | 0  | 8143.66645 |
| 9Apr2020-2Apr2021(a) | 17  | FALSE |             |            | 12.1413424 | 123.908031 | 8671.623   | -34.4424  | -160  | 0     | 0     | 160   | 0  | 7633.07992 |
| 9Apr2020-2Apr2021(a) | 16  | FALSE |             |            | 12.1451521 | 123.9054   | 8162.25    | -34.38453 | -160  | 0     | 0     | 160   | 0  | 7122.6574  |
| 9Apr2020-2Apr2021(a) | 15  | TRUE  | 0.07130727  | 0.05695096 | 12.1489618 | 123.90277  | 7652.873   | -34.38453 | -139  | 0     | 1     | 112   | 0  | 6612.34505 |
| 9Apr2020-2Apr2021(a) | 14  | TRUE  | 0.08665142  | 0.06495988 | 12.1527715 | 123.900139 | 7143.5     | -34.38453 | -41   | 0     | 11    | 26    | 0  | 6102.16332 |
| 9Apr2020-2Apr2021(a) | 13  | FALSE |             |            | 12.1565811 | 123.897508 | 6634.125   | -34.38453 | -160  | 0     | 0     | 160   | 0  | 5592.15107 |
| 9Apr2020-2Apr2021(a) | 12  | FALSE |             |            | 12.1603908 | 123.894877 | 6124.748   | -34.38453 | -160  | 0     | 18    | 39    | 0  | 5082.36233 |
| 9Apr2020-2Apr2021(a) | 11  | TRUE  | 0.09872866  | 0.0551126  | 12.1642004 | 123.892245 | 5615.375   | -34.38453 | -123  | 0     | 0     | 38    | 0  | 4572.8758  |
| 9Apr2020-2Apr2021(a) | 10  | FALSE |             |            | 12.1680076 | 123.889616 | 5106.312   | -34.38453 | -19   | -7    | 6     | 160   | 0  | 4064.11111 |
| 9Apr2020-2Apr2021(a) | 9   | FALSE |             |            | 12.1718149 | 123.886986 | 4597.248   | -34.38453 | -160  | 0     | 0     | 160   | 0  | 3555.9179  |
| 9Apr2020-2Apr2021(a) | 8   | FALSE |             |            | 12.1756244 | 123.884355 | 4087.875   | -33.38308 | -160  | 0     | 0     | 160   | 0  | 3048.30546 |
| 9Apr2020-2Apr2021(a) | 7   | FALSE |             |            | 12.1795879 | 123.881978 | 3578.5     | -29.12406 | -160  | 0     | 0     | 160   | 0  | 2548.49746 |
| 9Apr2020-2Apr2021(a) | 6   | FALSE |             |            | 12.1836163 | 123.879714 | 3069.437   | -29.12406 | -160  | 0     | 0     | 160   | 0  | 2058.13857 |
| 9Apr2020-2Apr2021(a) | 5   | FALSE |             |            | 12.1876735 | 123.877499 | 2559.748   | -24.86524 | -160  | 0     | 0     | 160   | 0  | 1583.23562 |
| 9Apr2020-2Apr2021(a) | 4   | FALSE |             |            | 12.1919488 | 123.875757 | 2050.374   | -22.02306 | -160  | 0     | 0     | 160   | 0  | 1176.85011 |

|                      |    |       |            |            |            |            |           |           |      |      |    |     |   |            |
|----------------------|----|-------|------------|------------|------------|------------|-----------|-----------|------|------|----|-----|---|------------|
| 9Apr2020-2Apr2021(a) | 3  | FALSE |            |            | 12.1962216 | 123.874016 | 1541.31   | -22.02306 | -160 | 0    | 0  | 160 | 0 | 887.230403 |
| 9Apr2020-2Apr2021(a) | 2  | FALSE |            |            | 12.2005074 | 123.87227  | 1030.686  | -27.76169 | -160 | 0    | 0  | 160 | 0 | 844.385799 |
| 9Apr2020-2Apr2021(a) | 1  | FALSE |            |            | 12.2043576 | 123.869682 | 520.062   | -33.81824 | -160 | 0    | 0  | 160 | 0 | 995.256034 |
| 9Apr2020-2Apr2021(b) | 51 | TRUE  | 0.33273487 | 0.0287009  | 12.0134796 | 123.999837 | 25989.123 | -36.46924 | -50  | -48  | 32 | 39  | 0 | 25002.4913 |
| 9Apr2020-2Apr2021(b) | 50 | TRUE  | 0.4239644  | 0.12114326 | 12.0171934 | 123.997069 | 25479.747 | -36.46924 | -160 | -63  | 36 | 69  | 0 | 24491.5148 |
| 9Apr2020-2Apr2021(b) | 49 | FALSE |            |            | 12.0209071 | 123.994302 | 24970.375 | -36.46924 | -92  | 0    | 65 | 160 | 0 | 23980.5378 |
| 9Apr2020-2Apr2021(b) | 48 | TRUE  | 0.49173623 | 0.28415468 | 12.0246208 | 123.991534 | 24460.999 | -36.46924 | -90  | -83  | 0  | 160 | 0 | 23469.564  |
| 9Apr2020-2Apr2021(b) | 47 | TRUE  | 0.60625078 | 0.09817956 | 12.0283346 | 123.988767 | 23951.623 | -36.46924 | -123 | -5   | 86 | 160 | 0 | 22958.578  |
| 9Apr2020-2Apr2021(b) | 46 | TRUE  | 0.46588346 | 0.09897281 | 12.0320483 | 123.985999 | 23442.249 | -36.46924 | -62  | -39  | 31 | 160 | 0 | 22447.6043 |
| 9Apr2020-2Apr2021(b) | 45 | FALSE |            |            | 12.0357306 | 123.983203 | 22933.81  | -37.01649 | -159 | -118 | 53 | 84  | 0 | 21936.741  |
| 9Apr2020-2Apr2021(b) | 44 | TRUE  | 0.49556171 | 0.05118723 | 12.0395007 | 123.980503 | 22423.5   | -34.28242 | -32  | 0    | 9  | 78  | 0 | 21425.9031 |
| 9Apr2020-2Apr2021(b) | 43 | TRUE  | 0.50264535 | 0.12184013 | 12.0433156 | 123.977882 | 21914.122 | -34.28242 | -136 | -95  | 0  | 160 | 0 | 20915.004  |
| 9Apr2020-2Apr2021(b) | 42 | TRUE  | 0.50039218 | 0.05399266 | 12.0471281 | 123.975261 | 21405.062 | -34.28242 | -160 | -27  | 28 | 160 | 0 | 20404.4302 |
| 9Apr2020-2Apr2021(b) | 41 | TRUE  | 0.51632243 | 0.13261708 | 12.0509406 | 123.972641 | 20895.998 | -34.28242 | -160 | -72  | 13 | 47  | 0 | 19893.8707 |
| 9Apr2020-2Apr2021(b) | 40 | TRUE  | 0.50832927 | 0.15420568 | 12.0547554 | 123.970019 | 20386.624 | -34.28242 | -146 | -98  | 0  | 27  | 0 | 19383.0108 |
| 9Apr2020-2Apr2021(b) | 39 | TRUE  | 0.50641744 | 0.05290008 | 12.0585679 | 123.967398 | 19877.562 | -34.28242 | -160 | 0    | 0  | 160 | 0 | 18872.47   |
| 9Apr2020-2Apr2021(b) | 38 | TRUE  | 0.50097173 | 0.06105171 | 12.0623803 | 123.964777 | 19368.498 | -34.28242 | -160 | 0    | 0  | 136 | 0 | 18361.9493 |
| 9Apr2020-2Apr2021(b) | 37 | TRUE  | 0.4934522  | 0.08178192 | 12.0661951 | 123.962155 | 18859.125 | -35.03386 | -45  | 0    | 0  | 160 | 0 | 17851.1291 |
| 9Apr2020-2Apr2021(b) | 36 | TRUE  | 0.50860693 | 0.06499803 | 12.0699243 | 123.959405 | 18349.434 | -36.55247 | -160 | 0    | 40 | 160 | 0 | 17339.8569 |
| 9Apr2020-2Apr2021(b) | 35 | TRUE  | 0.45001453 | 0.16392881 | 12.0736338 | 123.956631 | 17840.062 | -36.55247 | -147 | -72  | 50 | 71  | 0 | 16828.8698 |
| 9Apr2020-2Apr2021(b) | 34 | TRUE  | 0.44143461 | 0.06129742 | 12.0773507 | 123.953867 | 17330.685 | -36.23412 | -99  | 0    | 13 | 138 | 0 | 16317.8689 |
| 9Apr2020-2Apr2021(b) | 33 | TRUE  | 0.43482766 | 0.07252913 | 12.0810753 | 123.951114 | 16821.31  | -36.23412 | -41  | 0    | 14 | 160 | 0 | 15806.8526 |
| 9Apr2020-2Apr2021(b) | 32 | FALSE |            |            | 12.0847998 | 123.948361 | 16311.936 | -36.23412 | -57  | -23  | 0  | 55  | 0 | 15295.8413 |
| 9Apr2020-2Apr2021(b) | 31 | TRUE  | 0.3824916  | 0.06721108 | 12.088522  | 123.945609 | 15802.874 | -36.23412 | -60  | -33  | 0  | 160 | 0 | 14785.1416 |
| 9Apr2020-2Apr2021(b) | 30 | FALSE |            |            | 12.0922442 | 123.942857 | 15293.811 | -36.23412 | -17  | 0    | 36 | 49  | 0 | 14274.4444 |
| 9Apr2020-2Apr2021(b) | 29 | TRUE  | 0.32058185 | 0.0917417  | 12.0959687 | 123.940104 | 14784.436 | -36.23412 | -41  | 0    | 0  | 77  | 0 | 13763.4278 |
| 9Apr2020-2Apr2021(b) | 28 | TRUE  | 0.2713261  | 0.04438389 | 12.0996909 | 123.937352 | 14275.372 | -36.23412 | -24  | -6   | 16 | 30  | 0 | 13252.7227 |
| 9Apr2020-2Apr2021(b) | 27 | FALSE |            |            | 12.1034153 | 123.934599 | 13765.998 | -35.65941 | -160 | 0    | 96 | 103 | 0 | 12741.7072 |
| 9Apr2020-2Apr2021(b) | 26 | FALSE |            |            | 12.1072029 | 123.931931 | 13256.311 | -34.76896 | -77  | 0    | 0  | 160 | 0 | 12230.4714 |
| 9Apr2020-2Apr2021(b) | 25 | TRUE  | 0.23117737 | 0.08136461 | 12.110993  | 123.929276 | 12747.25  | -34.76896 | -160 | 0    | 8  | 145 | 0 | 11719.8892 |
| 9Apr2020-2Apr2021(b) | 24 | FALSE |            |            | 12.1147854 | 123.92662  | 12237.873 | -34.76896 | -160 | 0    | 0  | 160 | 0 | 11209.0121 |
| 9Apr2020-2Apr2021(b) | 23 | FALSE |            |            | 12.1185755 | 123.923966 | 11728.812 | -34.76896 | -160 | 0    | 0  | 160 | 0 | 10698.4607 |
| 9Apr2020-2Apr2021(b) | 22 | FALSE |            |            | 12.1223655 | 123.921311 | 11219.75  | -34.76896 | -160 | 0    | 0  | 160 | 0 | 10187.9508 |
| 9Apr2020-2Apr2021(b) | 21 | FALSE |            |            | 12.1261556 | 123.918656 | 10710.686 | -34.76896 | -63  | -51  | 0  | 160 | 0 | 9677.44906 |
| 9Apr2020-2Apr2021(b) | 20 | FALSE |            |            | 12.1299479 | 123.916    | 10201.312 | -34.76896 | -141 | -113 | 0  | 160 | 0 | 9166.66876 |
| 9Apr2020-2Apr2021(b) | 19 | TRUE  | 0.13216121 | 0.06557524 | 12.1337379 | 123.913345 | 9692.248  | -34.76896 | -39  | 0    | 86 | 121 | 0 | 8656.24412 |
| 9Apr2020-2Apr2021(b) | 18 | TRUE  | 0.11030284 | 0.06867561 | 12.1375302 | 123.910689 | 9182.872  | -34.76896 | -160 | 0    | 0  | 72  | 0 | 8145.55122 |
| 9Apr2020-2Apr2021(b) | 17 | TRUE  | 0.11110897 | 0.10371259 | 12.1413284 | 123.908041 | 8673.498  | -34.44383 | -57  | 0    | 58 | 160 | 0 | 7634.95139 |
| 9Apr2020-2Apr2021(b) | 16 | TRUE  | 0.0956645  | 0.05383098 | 12.1451381 | 123.90541  | 8164.124  | -34.38453 | -113 | 0    | 0  | 160 | 0 | 7124.53504 |
| 9Apr2020-2Apr2021(b) | 15 | FALSE |            |            | 12.1489455 | 123.902781 | 7655.061  | -34.38453 | -160 | 0    | 0  | 160 | 0 | 6614.52449 |
| 9Apr2020-2Apr2021(b) | 14 | FALSE |            |            | 12.1527551 | 123.90015  | 7145.688  | -34.38453 | -160 | 0    | 0  | 160 | 0 | 6104.35088 |
| 9Apr2020-2Apr2021(b) | 13 | FALSE |            |            | 12.1565624 | 123.897521 | 6636.624  | -34.38453 | -160 | 0    | 0  | 160 | 0 | 5594.65972 |
| 9Apr2020-2Apr2021(b) | 12 | FALSE |            |            | 12.1603721 | 123.894889 | 6127.248  | -34.38453 | -160 | 0    | 0  | 160 | 0 | 5084.86301 |
| 9Apr2020-2Apr2021(b) | 11 | FALSE |            |            | 12.1641793 | 123.89226  | 5618.188  | -34.38453 | -160 | 0    | 0  | 160 | 0 | 4575.6917  |
| 9Apr2020-2Apr2021(b) | 10 | FALSE |            |            | 12.1679866 | 123.88963  | 5109.124  | -34.38453 | -160 | 0    | 0  | 160 | 0 | 4066.91567 |
| 9Apr2020-2Apr2021(b) | 9  | FALSE |            |            | 12.1717938 | 123.887001 | 4600.061  | -34.38453 | -160 | 0    | 0  | 160 | 0 | 3558.72704 |
| 9Apr2020-2Apr2021(b) | 8  | FALSE |            |            | 12.1756034 | 123.884369 | 4090.688  | -33.41265 | -160 | 0    | 0  | 160 | 0 | 3051.10011 |
| 9Apr2020-2Apr2021(b) | 7  | FALSE |            |            | 12.1795682 | 123.881989 | 3580.999  | -29.12406 | -160 | 0    | 0  | 160 | 0 | 2550.91757 |
| 9Apr2020-2Apr2021(b) | 6  | FALSE |            |            | 12.1835965 | 123.879725 | 3071.937  | -29.12406 | -160 | 0    | 0  | 160 | 0 | 2060.52188 |
| 9Apr2020-2Apr2021(b) | 5  | FALSE |            |            | 12.1876525 | 123.877507 | 2562.249  | -24.90077 | -160 | 0    | 0  | 160 | 0 | 1585.37754 |
| 9Apr2020-2Apr2021(b) | 4  | FALSE |            |            | 12.1919305 | 123.875764 | 2052.562  | -22.02306 | -160 | 0    | 0  | 160 | 0 | 1178.41927 |

|                      |    |       |            |            |            |            |           |           |      |      |     |     |   |            |
|----------------------|----|-------|------------|------------|------------|------------|-----------|-----------|------|------|-----|-----|---|------------|
| 9Apr2020-2Apr2021(b) | 3  | FALSE |            |            | 12.1962032 | 123.874024 | 1543.498  | -22.02306 | -160 | 0    | 0   | 160 | 0 | 888.038444 |
| 9Apr2020-2Apr2021(b) | 2  | FALSE |            |            | 12.2004864 | 123.872279 | 1033.187  | -27.70254 | -160 | 0    | 0   | 160 | 0 | 843.836214 |
| 9Apr2020-2Apr2021(b) | 1  | FALSE |            |            | 12.2043387 | 123.869695 | 522.562   | -33.81824 | -160 | 0    | 0   | 160 | 0 | 993.93096  |
| 9Apr2020-11Apr2021   | 51 | TRUE  | 0.35484604 | 0.09205563 | 12.0134796 | 123.999837 | 25989.123 | -36.46924 | -11  | 0    | 53  | 71  | 0 | 25002.4913 |
| 9Apr2020-11Apr2021   | 50 | TRUE  | 0.40810627 | 0.10028857 | 12.0171911 | 123.997071 | 25480.062 | -36.46924 | -118 | -72  | 18  | 55  | 0 | 24491.8304 |
| 9Apr2020-11Apr2021   | 49 | FALSE |            |            | 12.0209026 | 123.994305 | 24970.999 | -36.46924 | -73  | 0    | 30  | 100 | 0 | 23981.16   |
| 9Apr2020-11Apr2021   | 48 | TRUE  | 0.49005569 | 0.17678469 | 12.024614  | 123.991539 | 24461.936 | -36.46924 | -156 | -108 | 0   | 66  | 0 | 23470.5017 |
| 9Apr2020-11Apr2021   | 47 | TRUE  | 0.59723665 | 0.31237946 | 12.0283277 | 123.988772 | 23952.561 | -36.46924 | -125 | -116 | 0   | 160 | 0 | 22959.5247 |
| 9Apr2020-11Apr2021   | 46 | TRUE  | 0.47399386 | 0.0687113  | 12.0320414 | 123.986004 | 23443.187 | -36.46924 | -160 | -20  | 0   | 160 | 0 | 22448.551  |
| 9Apr2020-11Apr2021   | 45 | FALSE |            |            | 12.0357306 | 123.983203 | 22933.81  | -37.01649 | -160 | 0    | 0   | 160 | 0 | 21937.685  |
| 9Apr2020-11Apr2021   | 44 | TRUE  | 0.49021133 | 0.14847772 | 12.0394937 | 123.980508 | 22424.438 | -34.28242 | -117 | -59  | 0   | 160 | 0 | 21426.8399 |
| 9Apr2020-11Apr2021   | 43 | TRUE  | 0.50328367 | 0.0615519  | 12.0433086 | 123.977886 | 21915.06  | -34.28242 | -90  | 0    | 21  | 41  | 0 | 20915.9407 |
| 9Apr2020-11Apr2021   | 42 | FALSE |            |            | 12.0471211 | 123.975266 | 21405.999 | -34.28242 | -65  | -59  | 6   | 41  | 0 | 20405.3669 |
| 9Apr2020-11Apr2021   | 41 | TRUE  | 0.49576506 | 0.27863187 | 12.0509359 | 123.972644 | 20896.626 | -34.28242 | -76  | -51  | 123 | 160 | 0 | 19894.4981 |
| 9Apr2020-11Apr2021   | 40 | FALSE |            |            | 12.0547484 | 123.970023 | 20387.562 | -34.28242 | -58  | 0    | 0   | 107 | 0 | 19383.9475 |
| 9Apr2020-11Apr2021   | 39 | TRUE  | 0.50690608 | 0.08513555 | 12.0585632 | 123.967401 | 19878.187 | -34.28242 | -160 | 0    | 0   | 155 | 0 | 18873.0975 |
| 9Apr2020-11Apr2021   | 38 | TRUE  | 0.49770879 | 0.33923548 | 12.0623756 | 123.964781 | 19369.123 | -34.28242 | -34  | -15  | 110 | 160 | 0 | 18362.5767 |
| 9Apr2020-11Apr2021   | 37 | FALSE |            |            | 12.0661904 | 123.962158 | 18859.75  | -35.03102 | -160 | 0    | 0   | 160 | 0 | 17851.7565 |
| 9Apr2020-11Apr2021   | 36 | FALSE |            |            | 12.0699197 | 123.959408 | 18350.062 | -36.55247 | -160 | 0    | 0   | 160 | 0 | 17340.488  |
| 9Apr2020-11Apr2021   | 35 | FALSE |            |            | 12.0736292 | 123.956634 | 17840.685 | -36.55247 | -160 | 0    | 0   | 160 | 0 | 16829.5009 |
| 9Apr2020-11Apr2021   | 34 | FALSE |            |            | 12.0773439 | 123.953872 | 17331.624 | -36.23412 | -160 | 0    | 0   | 160 | 0 | 16318.8066 |
| 9Apr2020-11Apr2021   | 33 | FALSE |            |            | 12.0810661 | 123.951121 | 16822.562 | -36.23412 | -160 | 0    | 0   | 160 | 0 | 15808.1148 |
| 9Apr2020-11Apr2021   | 32 | FALSE |            |            | 12.0847884 | 123.948369 | 16313.498 | -36.23412 | -160 | 0    | 0   | 160 | 0 | 15297.41   |
| 9Apr2020-11Apr2021   | 31 | FALSE |            |            | 12.0885106 | 123.945618 | 15804.437 | -36.23412 | -160 | 0    | 0   | 160 | 0 | 14786.7104 |
| 9Apr2020-11Apr2021   | 30 | FALSE |            |            | 12.0922328 | 123.942866 | 15295.373 | -36.23412 | -160 | 0    | 0   | 160 | 0 | 14276.0068 |
| 9Apr2020-11Apr2021   | 29 | FALSE |            |            | 12.095955  | 123.940114 | 14786.312 | -36.23412 | -160 | 0    | 0   | 160 | 0 | 13765.3057 |
| 9Apr2020-11Apr2021   | 28 | FALSE |            |            | 12.0996794 | 123.937361 | 14276.937 | -36.23412 | -160 | 0    | 0   | 160 | 0 | 13254.2941 |
| 9Apr2020-11Apr2021   | 27 | FALSE |            |            | 12.1034038 | 123.934607 | 13767.563 | -35.66399 | -160 | 0    | 0   | 160 | 0 | 12743.2849 |
| 9Apr2020-11Apr2021   | 26 | FALSE |            |            | 12.1071912 | 123.931939 | 13257.874 | -34.76896 | -160 | 0    | 0   | 160 | 0 | 12232.0479 |
| 9Apr2020-11Apr2021   | 25 | FALSE |            |            | 12.1109813 | 123.929285 | 12748.813 | -34.76896 | -160 | 0    | 0   | 160 | 0 | 11721.4658 |
| 9Apr2020-11Apr2021   | 24 | FALSE |            |            | 12.1147715 | 123.92663  | 12239.748 | -34.76896 | -160 | 0    | 0   | 160 | 0 | 11210.8887 |
| 9Apr2020-11Apr2021   | 23 | FALSE |            |            | 12.1185615 | 123.923975 | 11730.684 | -34.76896 | -160 | 0    | 0   | 160 | 0 | 10700.3462 |
| 9Apr2020-11Apr2021   | 22 | FALSE |            |            | 12.1223516 | 123.921321 | 11221.625 | -34.76896 | -160 | 0    | 0   | 160 | 0 | 10189.8208 |
| 9Apr2020-11Apr2021   | 21 | FALSE |            |            | 12.1261416 | 123.918666 | 10712.561 | -34.76896 | -160 | 0    | 0   | 160 | 0 | 9679.32788 |
| 9Apr2020-11Apr2021   | 20 | FALSE |            |            | 12.1299316 | 123.916011 | 10203.499 | -34.76896 | -160 | 0    | 0   | 160 | 0 | 9168.86294 |
| 9Apr2020-11Apr2021   | 19 | FALSE |            |            | 12.1337216 | 123.913357 | 9694.435  | -34.76896 | -160 | 0    | 0   | 160 | 0 | 8658.4381  |
| 9Apr2020-11Apr2021   | 18 | FALSE |            |            | 12.1375116 | 123.910702 | 9185.375  | -34.76896 | -160 | 0    | 0   | 160 | 0 | 8148.05397 |
| 9Apr2020-11Apr2021   | 17 | FALSE |            |            | 12.1413097 | 123.908054 | 8675.998  | -34.44576 | -160 | 0    | 0   | 160 | 0 | 7637.46271 |
| 9Apr2020-11Apr2021   | 16 | FALSE |            |            | 12.1451194 | 123.905423 | 8166.624  | -34.38453 | -160 | 0    | 0   | 160 | 0 | 7127.03934 |
| 9Apr2020-11Apr2021   | 15 | FALSE |            |            | 12.1489291 | 123.902792 | 7657.249  | -34.38453 | -160 | 0    | 0   | 160 | 0 | 6616.71936 |
| 9Apr2020-11Apr2021   | 14 | FALSE |            |            | 12.1527388 | 123.900161 | 7147.873  | -34.38453 | -160 | 0    | 0   | 160 | 0 | 6106.53628 |
| 9Apr2020-11Apr2021   | 13 | FALSE |            |            | 12.1565484 | 123.89753  | 6638.499  | -34.38453 | -160 | 0    | 0   | 160 | 0 | 5596.53567 |
| 9Apr2020-11Apr2021   | 12 | FALSE |            |            | 12.160358  | 123.894899 | 6129.126  | -34.38453 | -160 | 0    | 0   | 160 | 0 | 5086.74676 |
| 9Apr2020-11Apr2021   | 11 | FALSE |            |            | 12.1641677 | 123.892268 | 5619.748  | -34.38453 | -160 | 0    | 0   | 160 | 0 | 4577.24172 |
| 9Apr2020-11Apr2021   | 10 | FALSE |            |            | 12.1679772 | 123.889637 | 5110.374  | -34.38453 | -160 | 0    | 0   | 160 | 0 | 4068.17171 |
| 9Apr2020-11Apr2021   | 9  | FALSE |            |            | 12.1717868 | 123.887006 | 4600.998  | -34.38453 | -160 | 0    | 0   | 160 | 0 | 3559.66528 |
| 9Apr2020-11Apr2021   | 8  | FALSE |            |            | 12.1755964 | 123.884374 | 4091.623  | -33.4225  | -160 | 0    | 0   | 160 | 0 | 3052.02928 |
| 9Apr2020-11Apr2021   | 7  | FALSE |            |            | 12.1795583 | 123.881995 | 3582.249  | -29.12406 | -160 | 0    | 0   | 160 | 0 | 2552.13546 |
| 9Apr2020-11Apr2021   | 6  | FALSE |            |            | 12.1835891 | 123.879729 | 3072.874  | -29.12406 | -160 | 0    | 0   | 160 | 0 | 2061.41679 |
| 9Apr2020-11Apr2021   | 5  | FALSE |            |            | 12.1876446 | 123.87751  | 2563.186  | -24.91409 | -160 | 0    | 0   | 160 | 0 | 1586.18379 |
| 9Apr2020-11Apr2021   | 4  | FALSE |            |            | 12.1919252 | 123.875767 | 2053.186  | -22.02306 | -160 | 0    | 0   | 160 | 0 | 1178.86694 |

|                    |    |       |            |            |            |            |           |           |      |     |     |     |   |            |
|--------------------|----|-------|------------|------------|------------|------------|-----------|-----------|------|-----|-----|-----|---|------------|
| 9Apr2020-11Apr2021 | 3  | FALSE |            |            | 12.1962006 | 123.874025 | 1543.812  | -22.02306 | -160 | 0   | 0   | 160 | 0 | 888.158904 |
| 9Apr2020-11Apr2021 | 2  | FALSE |            |            | 12.2004838 | 123.87228  | 1033.501  | -27.69515 | -160 | 0   | 0   | 160 | 0 | 843.77295  |
| 9Apr2020-11Apr2021 | 1  | FALSE |            |            | 12.2043364 | 123.869696 | 522.875   | -33.81824 | -160 | 0   | 0   | 160 | 0 | 993.771958 |
| 9Apr2020-12Apr2021 | 51 | TRUE  | 0.34067834 | 0.01544119 | 12.0134796 | 123.999837 | 25989.123 | -36.46924 | -33  | -16 | 0   | 3   | 0 | 25002.4913 |
| 9Apr2020-12Apr2021 | 50 | TRUE  | 0.397865   | 0.09687638 | 12.0171934 | 123.997069 | 25479.747 | -36.46924 | -134 | -65 | 117 | 160 | 0 | 24491.5148 |
| 9Apr2020-12Apr2021 | 49 | FALSE |            |            | 12.0209071 | 123.994302 | 24970.375 | -36.46924 | -160 | 0   | 0   | 160 | 0 | 23980.5378 |
| 9Apr2020-12Apr2021 | 48 | FALSE |            |            | 12.0246208 | 123.991534 | 24460.999 | -36.46924 | -87  | -61 | 113 | 129 | 0 | 23469.564  |
| 9Apr2020-12Apr2021 | 47 | FALSE |            |            | 12.0283346 | 123.988767 | 23951.623 | -36.46924 | -102 | -47 | 0   | 160 | 0 | 22958.578  |
| 9Apr2020-12Apr2021 | 46 | TRUE  | 0.43338997 | 0.15240233 | 12.032046  | 123.986001 | 23442.562 | -36.46924 | -67  | -60 | 59  | 88  | 0 | 22447.9199 |
| 9Apr2020-12Apr2021 | 45 | FALSE |            |            | 12.0357306 | 123.983203 | 22933.81  | -37.01649 | -160 | 0   | 0   | 160 | 0 | 21937.685  |
| 9Apr2020-12Apr2021 | 44 | TRUE  | 0.50785284 | 0.04576955 | 12.0395007 | 123.980503 | 22423.5   | -34.28242 | -160 | 0   | 27  | 160 | 0 | 21425.9031 |
| 9Apr2020-12Apr2021 | 43 | TRUE  | 0.51026379 | 0.05387817 | 12.0433156 | 123.977882 | 21914.122 | -34.28242 | -81  | 0   | 0   | 115 | 0 | 20915.004  |
| 9Apr2020-12Apr2021 | 42 | TRUE  | 0.49994464 | 0.07052767 | 12.0471305 | 123.97526  | 21404.749 | -34.28242 | -53  | -17 | 0   | 160 | 0 | 20404.1119 |
| 9Apr2020-12Apr2021 | 41 | TRUE  | 0.50651659 | 0.08757276 | 12.0509453 | 123.972637 | 20895.373 | -34.28242 | -101 | 0   | 60  | 160 | 0 | 19893.2368 |
| 9Apr2020-12Apr2021 | 40 | TRUE  | 0.50586362 | 0.03894603 | 12.0547578 | 123.970017 | 20386.31  | -34.28242 | -137 | -19 | 0   | 160 | 0 | 19382.6862 |
| 9Apr2020-12Apr2021 | 39 | TRUE  | 0.50849381 | 0.12791967 | 12.0585726 | 123.967395 | 19876.936 | -34.28242 | -100 | -82 | 36  | 63  | 0 | 18871.8426 |
| 9Apr2020-12Apr2021 | 38 | TRUE  | 0.50566202 | 0.05641981 | 12.062385  | 123.964774 | 19367.875 | -34.28242 | -149 | 0   | 13  | 77  | 0 | 18361.3219 |
| 9Apr2020-12Apr2021 | 37 | FALSE |            |            | 12.0661997 | 123.962152 | 18858.5   | -35.0367  | -160 | 0   | 0   | 160 | 0 | 17850.5107 |
| 9Apr2020-12Apr2021 | 36 | FALSE |            |            | 12.0699288 | 123.959401 | 18348.811 | -36.55247 | -50  | 0   | 56  | 160 | 0 | 17339.2348 |
| 9Apr2020-12Apr2021 | 35 | TRUE  | 0.4612902  | 0.05270663 | 12.0736383 | 123.956627 | 17839.436 | -36.55247 | -160 | -53 | 27  | 113 | 0 | 16828.2477 |
| 9Apr2020-12Apr2021 | 34 | FALSE |            |            | 12.0773553 | 123.953864 | 17330.061 | -36.23412 | -86  | 0   | 0   | 11  | 0 | 16317.2378 |
| 9Apr2020-12Apr2021 | 33 | FALSE |            |            | 12.0810798 | 123.95111  | 16820.686 | -36.23412 | -47  | -18 | 6   | 14  | 0 | 15806.2305 |
| 9Apr2020-12Apr2021 | 32 | TRUE  | 0.39607981 | 0.04912496 | 12.0848044 | 123.948357 | 16311.312 | -36.23412 | -160 | 0   | 41  | 160 | 0 | 15295.2102 |
| 9Apr2020-12Apr2021 | 31 | TRUE  | 0.37561915 | 0.04125047 | 12.0885266 | 123.945606 | 15802.248 | -36.23412 | -84  | 0   | 11  | 145 | 0 | 14784.5169 |
| 9Apr2020-12Apr2021 | 30 | TRUE  | 0.3603707  | 0.02877028 | 12.0922488 | 123.942854 | 15293.187 | -36.23412 | -34  | -5  | 22  | 39  | 0 | 14273.8133 |
| 9Apr2020-12Apr2021 | 29 | TRUE  | 0.29337087 | 0.04273896 | 12.0959733 | 123.940101 | 14783.812 | -36.23412 | -35  | -7  | 0   | 59  | 0 | 13762.7967 |
| 9Apr2020-12Apr2021 | 28 | TRUE  | 0.28145075 | 0.02664526 | 12.0996954 | 123.937349 | 14274.748 | -36.23412 | -32  | 0   | 9   | 29  | 0 | 13252.1006 |
| 9Apr2020-12Apr2021 | 27 | TRUE  | 0.26913973 | 0.0433584  | 12.1034198 | 123.934595 | 13765.374 | -35.65758 | -9   | 0   | 0   | 149 | 0 | 12741.0915 |
| 9Apr2020-12Apr2021 | 26 | FALSE |            |            | 12.1072075 | 123.931928 | 13255.687 | -34.76896 | -8   | -5  | 18  | 32  | 0 | 12229.853  |
| 9Apr2020-12Apr2021 | 25 | FALSE |            |            | 12.111     | 123.929271 | 12746.311 | -34.76896 | -160 | 0   | 0   | 160 | 0 | 11718.9464 |
| 9Apr2020-12Apr2021 | 24 | FALSE |            |            | 12.1147924 | 123.926615 | 12236.937 | -34.76896 | -160 | 0   | 0   | 160 | 0 | 11208.0693 |
| 9Apr2020-12Apr2021 | 23 | TRUE  | 0.19663186 | 0.02751369 | 12.1185848 | 123.923959 | 11727.561 | -34.76896 | -8   | 0   | 23  | 39  | 0 | 10697.2088 |
| 9Apr2020-12Apr2021 | 22 | FALSE |            |            | 12.1223772 | 123.921303 | 11218.185 | -34.76896 | -160 | 0   | 0   | 160 | 0 | 10186.3746 |
| 9Apr2020-12Apr2021 | 21 | TRUE  | 0.17966687 | 0.09167586 | 12.1261695 | 123.918647 | 10708.813 | -34.76896 | -37  | -14 | 13  | 37  | 0 | 9675.57276 |
| 9Apr2020-12Apr2021 | 20 | FALSE |            |            | 12.1299596 | 123.915992 | 10199.749 | -34.76896 | -160 | 0   | 0   | 160 | 0 | 9165.09916 |
| 9Apr2020-12Apr2021 | 19 | TRUE  | 0.14196721 | 0.05961489 | 12.1337519 | 123.913335 | 9690.373  | -34.76896 | -68  | -28 | 0   | 66  | 0 | 8654.35916 |
| 9Apr2020-12Apr2021 | 18 | TRUE  | 0.10857924 | 0.12127174 | 12.1375442 | 123.910679 | 9180.999  | -34.76896 | -43  | -34 | 22  | 59  | 0 | 8143.66645 |
| 9Apr2020-12Apr2021 | 17 | FALSE |            |            | 12.1413424 | 123.908031 | 8671.623  | -34.4424  | -160 | 0   | 0   | 160 | 0 | 7633.07992 |
| 9Apr2020-12Apr2021 | 16 | FALSE |            |            | 12.1451521 | 123.9054   | 8162.25   | -34.38453 | -160 | -81 | 22  | 51  | 0 | 7122.6574  |
| 9Apr2020-12Apr2021 | 15 | TRUE  | 0.07997286 | 0.2444946  | 12.1489618 | 123.90277  | 7652.873  | -34.38453 | -140 | -81 | 84  | 121 | 0 | 6612.34505 |
| 9Apr2020-12Apr2021 | 14 | TRUE  | 0.06731385 | 0.02921437 | 12.1527715 | 123.900139 | 7143.5    | -34.38453 | -48  | -14 | 0   | 4   | 0 | 6102.16332 |
| 9Apr2020-12Apr2021 | 13 | FALSE |            |            | 12.1565811 | 123.897508 | 6634.125  | -34.38453 | -25  | -13 | 23  | 36  | 0 | 5592.15107 |
| 9Apr2020-12Apr2021 | 12 | FALSE |            |            | 12.1603908 | 123.894877 | 6124.748  | -34.38453 | -160 | 0   | 0   | 160 | 0 | 5082.36233 |
| 9Apr2020-12Apr2021 | 11 | FALSE |            |            | 12.1642004 | 123.892245 | 5615.375  | -34.38453 | -160 | 0   | 0   | 160 | 0 | 4572.8758  |
| 9Apr2020-12Apr2021 | 10 | FALSE |            |            | 12.1680076 | 123.889616 | 5106.312  | -34.38453 | -160 | 0   | 0   | 160 | 0 | 4064.11111 |
| 9Apr2020-12Apr2021 | 9  | FALSE |            |            | 12.1718149 | 123.886986 | 4597.248  | -34.38453 | -160 | 0   | 0   | 160 | 0 | 3555.9179  |
| 9Apr2020-12Apr2021 | 8  | FALSE |            |            | 12.1756244 | 123.884355 | 4087.875  | -33.38308 | -160 | 0   | 0   | 160 | 0 | 3048.30546 |
| 9Apr2020-12Apr2021 | 7  | FALSE |            |            | 12.1795879 | 123.881978 | 3578.5    | -29.12406 | -160 | 0   | 0   | 160 | 0 | 2548.49746 |
| 9Apr2020-12Apr2021 | 6  | FALSE |            |            | 12.1836163 | 123.879714 | 3069.437  | -29.12406 | -160 | 0   | 0   | 160 | 0 | 2058.13857 |
| 9Apr2020-12Apr2021 | 5  | FALSE |            |            | 12.1876735 | 123.877499 | 2559.748  | -24.86524 | -160 | 0   | 0   | 160 | 0 | 1583.23562 |
| 9Apr2020-12Apr2021 | 4  | FALSE |            |            | 12.1919488 | 123.875757 | 2050.374  | -22.02306 | -160 | 0   | 0   | 160 | 0 | 1176.85011 |



|                     |    |       |            |            |            |            |           |           |      |     |     |     |   |            |
|---------------------|----|-------|------------|------------|------------|------------|-----------|-----------|------|-----|-----|-----|---|------------|
| 9Apr2020-12Apr2021  | 3  | FALSE |            |            | 12.1962216 | 123.874016 | 1541.31   | -22.02306 | -160 | 0   | 0   | 160 | 0 | 887.230403 |
| 9Apr2020-12Apr2021  | 2  | FALSE |            |            | 12.2005074 | 123.87227  | 1030.686  | -27.76169 | -160 | 0   | 0   | 160 | 0 | 844.385799 |
| 9Apr2020-12Apr2021  | 1  | FALSE |            |            | 12.2043576 | 123.869682 | 520.062   | -33.81824 | -160 | 0   | 0   | 160 | 0 | 995.256034 |
| 28Nov2019-29Nov2020 | 51 | TRUE  | 0.35189053 | 0.18592042 | 12.0134796 | 123.999837 | 25989.123 | -36.46924 | -124 | -93 | 64  | 160 | 0 | 25002.4913 |
| 28Nov2019-29Nov2020 | 50 | TRUE  | 0.40039509 | 0.07581852 | 12.0171934 | 123.997069 | 25479.747 | -36.46924 | -95  | -31 | 11  | 25  | 0 | 24491.5148 |
| 28Nov2019-29Nov2020 | 49 | FALSE |            |            | 12.0209071 | 123.994302 | 24970.375 | -36.46924 | -89  | -60 | 39  | 56  | 0 | 23980.5378 |
| 28Nov2019-29Nov2020 | 48 | TRUE  | 0.51344445 | 0.07101798 | 12.0246208 | 123.991534 | 24460.999 | -36.46924 | -48  | -33 | 0   | 63  | 0 | 23469.564  |
| 28Nov2019-29Nov2020 | 47 | FALSE |            |            | 12.0283346 | 123.988767 | 23951.623 | -36.46924 | -93  | -22 | 0   | 160 | 0 | 22958.578  |
| 28Nov2019-29Nov2020 | 46 | TRUE  | 0.44647942 | 0.04589228 | 12.032046  | 123.986001 | 23442.562 | -36.46924 | -51  | -17 | 0   | 33  | 0 | 22447.9199 |
| 28Nov2019-29Nov2020 | 45 | TRUE  | 0.4904061  | 0.03427494 | 12.0357351 | 123.9832   | 22933.188 | -37.01376 | -92  | -15 | 12  | 27  | 0 | 21937.0629 |
| 28Nov2019-29Nov2020 | 44 | TRUE  | 0.51587319 | 0.11237674 | 12.0394984 | 123.980505 | 22423.811 | -34.28242 | -122 | -94 | 0   | 160 | 0 | 21426.2124 |
| 28Nov2019-29Nov2020 | 43 | TRUE  | 0.49950027 | 0.06202464 | 12.0433133 | 123.977883 | 21914.437 | -34.28242 | -160 | -80 | 10  | 20  | 0 | 20915.3132 |
| 28Nov2019-29Nov2020 | 42 | TRUE  | 0.49954208 | 0.07671498 | 12.0471258 | 123.975263 | 21405.372 | -34.28242 | -12  | -3  | 44  | 153 | 0 | 20404.7394 |
| 28Nov2019-29Nov2020 | 41 | FALSE |            |            | 12.0509383 | 123.972642 | 20896.317 | -34.28242 | -37  | -15 | 0   | 160 | 0 | 19894.1799 |
| 28Nov2019-29Nov2020 | 40 | FALSE |            |            | 12.0547531 | 123.97002  | 20386.937 | -34.28242 | -6   | -1  | 117 | 139 | 0 | 19383.32   |
| 28Nov2019-29Nov2020 | 39 | FALSE |            |            | 12.0585655 | 123.9674   | 19877.874 | -34.28242 | -160 | 0   | 0   | 160 | 0 | 18872.7883 |
| 28Nov2019-29Nov2020 | 38 | FALSE |            |            | 12.062378  | 123.964779 | 19368.813 | -34.28242 | -160 | -55 | 19  | 29  | 0 | 18362.2585 |
| 28Nov2019-29Nov2020 | 37 | TRUE  | 0.50863164 | 0.08152299 | 12.0661927 | 123.962157 | 18859.435 | -35.03244 | -32  | -16 | 18  | 34  | 0 | 17851.4473 |
| 28Nov2019-29Nov2020 | 36 | TRUE  | 0.50457355 | 0.26404129 | 12.069922  | 123.959406 | 18349.749 | -36.55247 | -20  | -7  | 41  | 70  | 0 | 17340.1725 |
| 28Nov2019-29Nov2020 | 35 | TRUE  | 0.43662157 | 0.35189098 | 12.0736315 | 123.956632 | 17840.374 | -36.55247 | -105 | -94 | 49  | 65  | 0 | 16829.1853 |
| 28Nov2019-29Nov2020 | 34 | TRUE  | 0.45669601 | 0.0696154  | 12.0773484 | 123.953869 | 17330.998 | -36.23412 | -138 | -56 | 68  | 137 | 0 | 16318.1845 |
| 28Nov2019-29Nov2020 | 33 | FALSE |            |            | 12.081073  | 123.951116 | 16821.623 | -36.23412 | -160 | 0   | 27  | 46  | 0 | 15807.1681 |
| 28Nov2019-29Nov2020 | 32 | FALSE |            |            | 12.0847975 | 123.948362 | 16312.249 | -36.23412 | -160 | 0   | 0   | 160 | 0 | 15296.1568 |
| 28Nov2019-29Nov2020 | 31 | FALSE |            |            | 12.0885198 | 123.945611 | 15803.185 | -36.23412 | -160 | 0   | 0   | 160 | 0 | 14785.4482 |
| 28Nov2019-29Nov2020 | 30 | FALSE |            |            | 12.0922419 | 123.942859 | 15294.124 | -36.23412 | -10  | -7  | 46  | 70  | 0 | 14274.76   |
| 28Nov2019-29Nov2020 | 29 | TRUE  | 0.30163284 | 0.11854357 | 12.0959664 | 123.940106 | 14784.749 | -36.23412 | -61  | -49 | 2   | 16  | 0 | 13763.7433 |
| 28Nov2019-29Nov2020 | 28 | TRUE  | 0.29491539 | 0.09178051 | 12.0996886 | 123.937354 | 14275.685 | -36.23412 | -17  | -12 | 11  | 23  | 0 | 13253.0383 |
| 28Nov2019-29Nov2020 | 27 | FALSE |            |            | 12.103413  | 123.9346   | 13766.311 | -35.66032 | -160 | -67 | 38  | 60  | 0 | 12742.0228 |
| 28Nov2019-29Nov2020 | 26 | TRUE  | 0.2556875  | 0.12479991 | 12.1072005 | 123.931932 | 13256.626 | -34.76896 | -60  | -9  | 36  | 56  | 0 | 12230.7959 |
| 28Nov2019-29Nov2020 | 25 | TRUE  | 0.24133267 | 0.59738029 | 12.110993  | 123.929276 | 12747.25  | -34.76896 | -79  | -74 | 53  | 60  | 0 | 11719.8892 |
| 28Nov2019-29Nov2020 | 24 | FALSE |            |            | 12.1147854 | 123.92662  | 12237.873 | -34.76896 | -58  | -21 | 0   | 43  | 0 | 11209.0121 |
| 28Nov2019-29Nov2020 | 23 | TRUE  | 0.20291529 | 0.13020956 | 12.1185755 | 123.923966 | 11728.812 | -34.76896 | -72  | -56 | 8   | 71  | 0 | 10698.4607 |
| 28Nov2019-29Nov2020 | 22 | FALSE |            |            | 12.1223655 | 123.921311 | 11219.75  | -34.76896 | -25  | -2  | 7   | 24  | 0 | 10187.9508 |
| 28Nov2019-29Nov2020 | 21 | FALSE |            |            | 12.1261556 | 123.918656 | 10710.686 | -34.76896 | -160 | 0   | 0   | 160 | 0 | 9677.44906 |
| 28Nov2019-29Nov2020 | 20 | FALSE |            |            | 12.1299456 | 123.916002 | 10201.624 | -34.76896 | -20  | -13 | 0   | 5   | 0 | 9166.98428 |
| 28Nov2019-29Nov2020 | 19 | TRUE  | 0.15499298 | 0.04308265 | 12.1337379 | 123.913345 | 9692.248  | -34.76896 | -23  | 0   | 0   | 54  | 0 | 8656.24412 |
| 28Nov2019-29Nov2020 | 18 | TRUE  | 0.11672596 | 0.1039884  | 12.1375279 | 123.91069  | 9183.188  | -34.76896 | -23  | -14 | 31  | 54  | 0 | 8145.86021 |
| 28Nov2019-29Nov2020 | 17 | FALSE |            |            | 12.1413261 | 123.908042 | 8673.813  | -34.44408 | -160 | 0   | 0   | 160 | 0 | 7635.26687 |
| 28Nov2019-29Nov2020 | 16 | FALSE |            |            | 12.1451334 | 123.905413 | 8164.749  | -34.38453 | -160 | 0   | 0   | 160 | 0 | 7125.16169 |
| 28Nov2019-29Nov2020 | 15 | FALSE |            |            | 12.1489408 | 123.902784 | 7655.686  | -34.38453 | -160 | 0   | 0   | 160 | 0 | 6615.15757 |
| 28Nov2019-29Nov2020 | 14 | FALSE |            |            | 12.1527481 | 123.900155 | 7146.623  | -34.38453 | -160 | 0   | 0   | 160 | 0 | 6105.29253 |
| 28Nov2019-29Nov2020 | 13 | FALSE |            |            | 12.1565555 | 123.897525 | 6637.56   | -34.38453 | -160 | 0   | 0   | 160 | 0 | 5595.58559 |
| 28Nov2019-29Nov2020 | 12 | FALSE |            |            | 12.1603651 | 123.894894 | 6128.186  | -34.38453 | -160 | 0   | 0   | 160 | 0 | 5085.79715 |
| 28Nov2019-29Nov2020 | 11 | FALSE |            |            | 12.1641747 | 123.892263 | 5618.813  | -34.38453 | -160 | 0   | 0   | 160 | 0 | 4576.30825 |
| 28Nov2019-29Nov2020 | 10 | FALSE |            |            | 12.1679843 | 123.889632 | 5109.436  | -34.38453 | -160 | 0   | 0   | 160 | 0 | 4067.22366 |
| 28Nov2019-29Nov2020 | 9  | FALSE |            |            | 12.1717915 | 123.887002 | 4600.373  | -34.38453 | -160 | 0   | 0   | 160 | 0 | 3559.04164 |
| 28Nov2019-29Nov2020 | 8  | FALSE |            |            | 12.175601  | 123.884371 | 4090.998  | -33.41593 | -160 | 0   | 0   | 160 | 0 | 3051.4154  |
| 28Nov2019-29Nov2020 | 7  | FALSE |            |            | 12.1795632 | 123.881992 | 3581.625  | -29.12406 | -160 | 0   | 0   | 160 | 0 | 2551.53055 |
| 28Nov2019-29Nov2020 | 6  | FALSE |            |            | 12.183594  | 123.879727 | 3072.249  | -29.12406 | -160 | 0   | 0   | 160 | 0 | 2060.82271 |
| 28Nov2019-29Nov2020 | 5  | FALSE |            |            | 12.1876498 | 123.877508 | 2562.562  | -24.90521 | -160 | 0   | 0   | 160 | 0 | 1585.65362 |
| 28Nov2019-29Nov2020 | 4  | FALSE |            |            | 12.1919278 | 123.875765 | 2052.875  | -22.02306 | -160 | 0   | 0   | 160 | 0 | 1178.64037 |

|                     |    |       |            |            |            |            |           |           |      |      |     |     |   |            |
|---------------------|----|-------|------------|------------|------------|------------|-----------|-----------|------|------|-----|-----|---|------------|
| 28Nov2019-29Nov2020 | 3  | FALSE |            |            | 12.1962006 | 123.874025 | 1543.812  | -22.02306 | -160 | 0    | 0   | 160 | 0 | 888.158904 |
| 28Nov2019-29Nov2020 | 2  | FALSE |            |            | 12.2004838 | 123.87228  | 1033.501  | -27.69515 | -160 | 0    | 0   | 160 | 0 | 843.77295  |
| 28Nov2019-29Nov2020 | 1  | FALSE |            |            | 12.2043364 | 123.869696 | 522.875   | -33.81824 | -160 | 0    | 0   | 160 | 0 | 993.771958 |
| 9Apr-29Nov2020      | 51 | FALSE |            |            | 12.0134796 | 123.999837 | 25989.123 | -36.46924 | -160 | 0    | 0   | 160 | 0 | 25002.4913 |
| 9Apr-29Nov2020      | 50 | TRUE  | 0.39972558 | 0.08276611 | 12.0171934 | 123.997069 | 25479.747 | -36.46924 | -87  | 0    | 137 | 160 | 0 | 24491.5148 |
| 9Apr-29Nov2020      | 49 | TRUE  | 0.47685942 | 0.14627711 | 12.0209071 | 123.994302 | 24970.375 | -36.46924 | -85  | -62  | 26  | 50  | 0 | 23980.5378 |
| 9Apr-29Nov2020      | 48 | FALSE |            |            | 12.0246208 | 123.991534 | 24460.999 | -36.46924 | -108 | 0    | 45  | 85  | 0 | 23469.564  |
| 9Apr-29Nov2020      | 47 | FALSE |            |            | 12.0283346 | 123.988767 | 23951.623 | -36.46924 | -160 | 0    | 130 | 149 | 0 | 22958.578  |
| 9Apr-29Nov2020      | 46 | TRUE  | 0.45356257 | 0.04315329 | 12.0320483 | 123.985999 | 23442.249 | -36.46924 | -160 | -12  | 0   | 36  | 0 | 22447.6043 |
| 9Apr-29Nov2020      | 45 | FALSE |            |            | 12.0357306 | 123.983203 | 22933.81  | -37.01649 | -160 | 0    | 0   | 160 | 0 | 21936.741  |
| 9Apr-29Nov2020      | 44 | TRUE  | 0.50572554 | 0.08283207 | 12.0395007 | 123.980503 | 22423.5   | -34.28242 | -136 | -125 | 64  | 101 | 0 | 21425.9031 |
| 9Apr-29Nov2020      | 43 | TRUE  | 0.50526117 | 0.19594473 | 12.0433156 | 123.977882 | 21914.122 | -34.28242 | -116 | -76  | 34  | 52  | 0 | 20915.004  |
| 9Apr-29Nov2020      | 42 | FALSE |            |            | 12.0471281 | 123.975261 | 21405.062 | -34.28242 | -160 | 0    | 0   | 160 | 0 | 20404.4302 |
| 9Apr-29Nov2020      | 41 | TRUE  | 0.4963393  | 0.07689586 | 12.0509406 | 123.972641 | 20895.998 | -34.28242 | -106 | -61  | 100 | 160 | 0 | 19893.8707 |
| 9Apr-29Nov2020      | 40 | TRUE  | 0.50290736 | 0.0723947  | 12.0547554 | 123.970019 | 20386.624 | -34.28242 | -89  | -77  | 64  | 160 | 0 | 19383.0108 |
| 9Apr-29Nov2020      | 39 | FALSE |            |            | 12.0585679 | 123.967398 | 19877.562 | -34.28242 | -160 | 0    | 0   | 160 | 0 | 18872.47   |
| 9Apr-29Nov2020      | 38 | FALSE |            |            | 12.0623803 | 123.964777 | 19368.498 | -34.28242 | -160 | 0    | 0   | 160 | 0 | 18361.9493 |
| 9Apr-29Nov2020      | 37 | TRUE  | 0.50452237 | 0.0434915  | 12.0661951 | 123.962155 | 18859.125 | -35.03386 | -12  | -9   | 14  | 36  | 0 | 17851.1291 |
| 9Apr-29Nov2020      | 36 | FALSE |            |            | 12.0699243 | 123.959405 | 18349.434 | -36.55247 | -115 | -91  | 11  | 78  | 0 | 17339.8569 |
| 9Apr-29Nov2020      | 35 | TRUE  | 0.46955615 | 0.0588889  | 12.0736338 | 123.956631 | 17840.062 | -36.55247 | -134 | -18  | 24  | 160 | 0 | 16828.8698 |
| 9Apr-29Nov2020      | 34 | TRUE  | 0.45296987 | 0.06795371 | 12.0773507 | 123.953867 | 17330.685 | -36.23412 | -133 | -50  | 46  | 160 | 0 | 16317.8689 |
| 9Apr-29Nov2020      | 33 | TRUE  | 0.43443634 | 0.05933579 | 12.0810753 | 123.951114 | 16821.31  | -36.23412 | -32  | -19  | 82  | 119 | 0 | 15806.8526 |
| 9Apr-29Nov2020      | 32 | TRUE  | 0.40795861 | 0.05571534 | 12.0847998 | 123.948361 | 16311.936 | -36.23412 | -136 | 0    | 0   | 138 | 0 | 15295.8413 |
| 9Apr-29Nov2020      | 31 | TRUE  | 0.37191952 | 0.05554698 | 12.088522  | 123.945609 | 15802.874 | -36.23412 | -160 | -20  | 0   | 160 | 0 | 14785.1416 |
| 9Apr-29Nov2020      | 30 | TRUE  | 0.35029621 | 0.0418913  | 12.0922442 | 123.942857 | 15293.811 | -36.23412 | -139 | 0    | 0   | 160 | 0 | 14274.4444 |
| 9Apr-29Nov2020      | 29 | TRUE  | 0.30383379 | 0.0480542  | 12.0959664 | 123.940106 | 14784.749 | -36.23412 | -21  | -11  | 0   | 36  | 0 | 13763.7433 |
| 9Apr-29Nov2020      | 28 | FALSE |            |            | 12.0996886 | 123.937354 | 14275.685 | -36.23412 | -160 | 0    | 0   | 160 | 0 | 13253.0383 |
| 9Apr-29Nov2020      | 27 | FALSE |            |            | 12.103413  | 123.9346   | 13766.311 | -35.66032 | -33  | -26  | 55  | 78  | 0 | 12742.0228 |
| 9Apr-29Nov2020      | 26 | TRUE  | 0.2546573  | 0.05653063 | 12.1072005 | 123.931932 | 13256.626 | -34.76896 | -73  | 0    | 64  | 129 | 0 | 12230.7959 |
| 9Apr-29Nov2020      | 25 | TRUE  | 0.23336395 | 0.03109694 | 12.1109907 | 123.929278 | 12747.562 | -34.76896 | -41  | -19  | 30  | 37  | 0 | 11720.1984 |
| 9Apr-29Nov2020      | 24 | TRUE  | 0.22124972 | 0.06815274 | 12.1147831 | 123.926622 | 12238.186 | -34.76896 | -36  | 0    | 47  | 69  | 0 | 11209.3212 |
| 9Apr-29Nov2020      | 23 | FALSE |            |            | 12.1185732 | 123.923967 | 11729.124 | -34.76896 | -160 | 0    | 0   | 160 | 0 | 10698.7762 |
| 9Apr-29Nov2020      | 22 | FALSE |            |            | 12.1223632 | 123.921313 | 11220.062 | -34.76896 | -47  | -21  | 24  | 47  | 0 | 10188.2599 |
| 9Apr-29Nov2020      | 21 | FALSE |            |            | 12.1261532 | 123.918658 | 10711     | -34.76896 | -47  | -38  | 0   | 61  | 0 | 9677.76709 |
| 9Apr-29Nov2020      | 20 | TRUE  | 0.16668573 | 0.09988923 | 12.1299456 | 123.916002 | 10201.624 | -34.76896 | -49  | -37  | 0   | 15  | 0 | 9166.98428 |
| 9Apr-29Nov2020      | 19 | FALSE |            |            | 12.1337356 | 123.913347 | 9692.56   | -34.76896 | -160 | 0    | 0   | 160 | 0 | 8656.55314 |
| 9Apr-29Nov2020      | 18 | FALSE |            |            | 12.1375256 | 123.910692 | 9183.5    | -34.76896 | -160 | 0    | 0   | 160 | 0 | 8146.1692  |
| 9Apr-29Nov2020      | 17 | FALSE |            |            | 12.1413237 | 123.908044 | 8674.123  | -34.44431 | -160 | 0    | 0   | 160 | 0 | 7635.58471 |
| 9Apr-29Nov2020      | 16 | FALSE |            |            | 12.1451334 | 123.905413 | 8164.749  | -34.38453 | -160 | 0    | 0   | 160 | 0 | 7125.16169 |
| 9Apr-29Nov2020      | 15 | FALSE |            |            | 12.1489408 | 123.902784 | 7655.686  | -34.38453 | -160 | 0    | 0   | 160 | 0 | 6615.15757 |
| 9Apr-29Nov2020      | 14 | FALSE |            |            | 12.1527505 | 123.900153 | 7146.313  | -34.38453 | -160 | 0    | 0   | 160 | 0 | 6104.97499 |
| 9Apr-29Nov2020      | 13 | FALSE |            |            | 12.1565578 | 123.897524 | 6637.249  | -34.38453 | -160 | 0    | 0   | 160 | 0 | 5595.27696 |
| 9Apr-29Nov2020      | 12 | FALSE |            |            | 12.1603674 | 123.894893 | 6127.873  | -34.38453 | -160 | 0    | 0   | 160 | 0 | 5085.48868 |
| 9Apr-29Nov2020      | 11 | FALSE |            |            | 12.164177  | 123.892262 | 5618.498  | -34.38453 | -160 | 0    | 0   | 160 | 0 | 4575.99997 |
| 9Apr-29Nov2020      | 10 | FALSE |            |            | 12.1679843 | 123.889632 | 5109.436  | -34.38453 | -160 | 0    | 0   | 160 | 0 | 4067.22366 |
| 9Apr-29Nov2020      | 9  | FALSE |            |            | 12.1717915 | 123.887002 | 4600.373  | -34.38453 | -160 | 0    | 0   | 160 | 0 | 3559.04164 |
| 9Apr-29Nov2020      | 8  | FALSE |            |            | 12.175601  | 123.884371 | 4090.998  | -33.41593 | -160 | 0    | 0   | 160 | 0 | 3051.4154  |
| 9Apr-29Nov2020      | 7  | FALSE |            |            | 12.1795657 | 123.881991 | 3581.311  | -29.12406 | -160 | 0    | 0   | 160 | 0 | 2551.22406 |
| 9Apr-29Nov2020      | 6  | FALSE |            |            | 12.183594  | 123.879727 | 3072.249  | -29.12406 | -160 | 0    | 0   | 160 | 0 | 2060.82271 |
| 9Apr-29Nov2020      | 5  | FALSE |            |            | 12.1876498 | 123.877508 | 2562.562  | -24.90521 | -160 | 0    | 0   | 160 | 0 | 1585.65362 |
| 9Apr-29Nov2020      | 4  | FALSE |            |            | 12.1919278 | 123.875765 | 2052.875  | -22.02306 | -160 | 0    | 0   | 160 | 0 | 1178.64037 |

|                |   |       |  |            |            |          |           |      |   |   |     |   |            |
|----------------|---|-------|--|------------|------------|----------|-----------|------|---|---|-----|---|------------|
| 9Apr-29Nov2020 | 3 | FALSE |  | 12.1962006 | 123.874025 | 1543.812 | -22.02306 | -160 | 0 | 0 | 160 | 0 | 888.158904 |
| 9Apr-29Nov2020 | 2 | FALSE |  | 12.2004838 | 123.87228  | 1033.501 | -27.69515 | -160 | 0 | 0 | 160 | 0 | 843.77295  |
| 9Apr-29Nov2020 | 1 | FALSE |  | 12.2043364 | 123.869696 | 522.875  | -33.81824 | -160 | 0 | 0 | 160 | 0 | 993.771958 |

## S2 Field Data

### S2.1 Database

Table S4: Field survey measurements and observations

| date   | ptID | location             | offset | trend  | type         | lat       | long      | naro_dist | description                                                                                                                                                                                          |
|--------|------|----------------------|--------|--------|--------------|-----------|-----------|-----------|------------------------------------------------------------------------------------------------------------------------------------------------------------------------------------------------------|
| 18-May | FD1  | Canomay Dimasalang   | 0.5 cm | 308 NW | liquefaction | 12.195278 | 123.86472 | 0.1621    | (possibly due to 2003 event) fence showing offset; or liquefaction induced?                                                                                                                          |
| 18-May | FD2  | Canomay Dimasalang   | n/a    | n/a    | liquefaction | 12.195556 | 123.865   | 0.1192    | Road depressions (smooth, pre-EQ), liquefaction?                                                                                                                                                     |
| 18-May | FD3  | Dimasalang           | n/a    | n/a    | liquefaction | 12.196111 | 123.86611 | 0.031     | depressions; liquefaction?; depressed wall section                                                                                                                                                   |
| 18-May | FD4  | Suba, Dimasalang     | n/a    | n/a    | liquefaction | 12.198333 | 123.86778 | 0.3139    | depressions (previously flat)                                                                                                                                                                        |
| 18-May | FD5  | Gaid, Dimasalang     | 1 cm   | 342 N  | rupture      | 12.172778 | 123.88333 | 3.2264    | Fracture on asphalt constructed on 2019; no fracture on other sections of the road; no fracture on road widening concrete constructed post EQ                                                        |
| 18-May | FD6  | Gaid, Dimasalang     | 1 cm   | 340 N  | rupture      | 12.171944 | 123.88528 | 3.4277    | Piggery, fractured for about 15m long; left lateral slip is apparent; parallel to fault strike if not actually traversed by fault; accompanied by vertical offset due to loss of foundation material |
| 18-May | FP1a | Sta Cruz, Palanas    | 5 cm   | 143 SE | rupture      | 12.169722 | 123.88694 | 3.734     | Displaced house showing left lateral slip (side wall)                                                                                                                                                |
|        | FP1b |                      | 2 cm   | 145 SE | rupture      | 12.169722 | 123.88694 | 3.734     | (cont.) stairs steps                                                                                                                                                                                 |
| 18-May | FP2  | Sta Cruz, Palanas    | n/a    | 137 SE | fracture     | 12.170556 | 123.88639 | 3.6238    | covered by asphalt already                                                                                                                                                                           |
| 18-May | FP3a | Sta Cruz, Palanas    | 3 cm   | 328 NW | rupture      | 12.168333 | 123.88861 | 3.9674    | 2 storey green house 2cm verti                                                                                                                                                                       |
|        | FP3b |                      | 1 cm   | 328 NW | rupture      | 12.168333 | 123.88861 | 3.9674    | (cont.) floor                                                                                                                                                                                        |
| 18-May | FP4  | Jose Abenir, Palanas | n/a    | n/a    | EIL          | 12.131944 | 123.91694 | 9.0519    | EIL (resident account)                                                                                                                                                                               |
| 18-May | FP5  | Malibas, Palanas     | 7 cm   | 263 W  | rupture      | 12.1475   | 123.90444 | 6.8524    | Road showing left lateral offset with apparent perpendicular separation; directly on top of trace (SEEN ON OIC)                                                                                      |
| 18-May | FP6  | Malibas, Palanas     | n/a    | n/a    | fracture     | 12.147222 | 123.90417 | 6.8584    | House on top of fault; fractures for measurement?; photo is taken perpendicular to the fault strike direction                                                                                        |
| 18-May | FP7a | Matugnao, Palanas    | 87 cm  | 93 E   | rupture      | 12.100556 | 123.93806 | 13.2204   | cracked tree (offset is total including 2003 event + post seismic) (assumption: 60 cm previous offset)                                                                                               |
| 18-May | FP7b | Matugnao, Palanas    | n/a    | 155 SE | rupture      | 12.100556 | 123.93806 | 13.2204   | Fissures/mole tracks near tree; en echelon; already eroded and obscured by vegetation; roughly 20-30m length accdg to residents                                                                      |
| 18-May | FP8  | Puyao, Palanas       | n/a    | 244 NW | rupture      | 12.088333 | 123.94583 | 14.8166   | Ruptures/mole tracks (mostly eroded); traversed a termite mound and split it open, torn off portion has been eroded far from rupture, ground shaking induced fractures, road replaced, house cracked |
| 18-May | FP9  | Nabangig, Palanas    | n/a    | n/a    | fracture     | 12.096667 | 123.94972 | 14.3417   | no rupture nor cracks; possibly repaired                                                                                                                                                             |
| 18-May | FC1  | Cataingan            | n/a    | n/a    | none         | 12.088333 | 123.96333 | 16.0072   | longitudinal fractures on road widening                                                                                                                                                              |
| 18-May | FC2  | Cataingan            | n/a    | n/a    | fracture     | 12.078889 | 123.96778 | 17.1175   | none                                                                                                                                                                                                 |
| 19-May | FC3  | Cataingan            | n/a    | n/a    | none         | 12.074722 | 123.96972 | 17.6081   | unfinished house, wall (entirety of rupture of about 200 m long, rupture length is according to residents)                                                                                           |
| 19-May | FC4a | Sitio Salag, Pawican | 50 cm  | 297 W  | rupture      | 12.07     | 123.95917 | 17.3181   | visible fractured mound at the base of the wall                                                                                                                                                      |
| 19-May | FC4b | Sitio Salag, Pawican | 48 cm  | 297 W  | rupture      | 12.07     | 123.95917 | 17.3181   | en echelon fissures, several aligned (4 gashes identified in photos)                                                                                                                                 |
| 19-May | FC5  | Sitio Salag, Pawican | n/a    | 300 NW | fracture     | 12.069167 | 123.95972 | 17.4286   |                                                                                                                                                                                                      |

|        |       |                           |         |        |              |           |           |         |                                                                                                                                                                                                                                           |
|--------|-------|---------------------------|---------|--------|--------------|-----------|-----------|---------|-------------------------------------------------------------------------------------------------------------------------------------------------------------------------------------------------------------------------------------------|
| 19-May | FC6   | Sitio Salag, Pawican      | n/a     | n/a    | fracture     | 12.066111 | 123.96222 | 17.8632 | fractured road (about 5m span) running parallel to the fault; photo taken looking 155 SE; unsure if with measurements; no dedicated OIC point                                                                                             |
| 19-May | FP10  | Puyao, Palanas            | n/a     | n/a    | none         | 12.087222 | 123.94639 | 14.9521 | none                                                                                                                                                                                                                                      |
| 19-May | FP11  | Palanas                   | n/a     | n/a    | none         | 12.091667 | 123.94361 | 14.3747 | none                                                                                                                                                                                                                                      |
| 19-May | FC7   | Cataingan                 | n/a     | n/a    | fracture     | 12.061944 | 123.97278 | 18.9229 | road cracked during the EQ (accdg to residents; asphalted already)                                                                                                                                                                        |
| 19-May | FC8   | Sitio Buri                | 50 cm   | 166 S  | rupture      | 12.041667 | 123.97917 | 21.1456 | ruptured roots of a tree                                                                                                                                                                                                                  |
| 19-May | FC9   | Sitio Buri                | 50 cm   | 133 SE | rupture      | 12.040833 | 123.97944 | 21.2386 | faint remnant rupture                                                                                                                                                                                                                     |
| 19-May | FC10  | Sitio Buri                | n/a     | 130 SE | rupture      | 12.040556 | 123.98    | 21.2988 | Fractured and eroded                                                                                                                                                                                                                      |
| 19-May | FC11  | Gahit, Cataingan          | 30 cm   | 140 SE | rupture      | 12.035556 | 123.98361 | 21.9795 | asphalted road; possibly showing post seismic deformation thru en echelon cracks                                                                                                                                                          |
| 19-May | FC12  | San Pedro, Cataingan      | 60 cm   | 99 E   | rupture      | 12.028611 | 123.98917 | 22.9591 | rice field; other ruptures are erased                                                                                                                                                                                                     |
| 19-May | FC13  | San Pedro, Cataingan      | 134 cm  | 330 NW | rupture      | 12.024167 | 123.9925  | 23.572  | Offset tree row (too high for the EQ) ; looking 60 NE                                                                                                                                                                                     |
| 19-May | FC14  | Concepcion, Cataingan     | n/a     | 130 SE | rupture      | 12.015556 | 124.00528 | 25.1672 | Fractured fishpond dike near school                                                                                                                                                                                                       |
| 19-May | FC15  | Sitio Alimango, Cataingan | n/a     | 152 SE | rupture      | 12.013889 | 123.99972 | 24.9584 | Fractured fishpond dike                                                                                                                                                                                                                   |
| 19-May | FC16  | Sitio Alimango, Cataingan | 34 cm   | 161 S  | rupture      | 12.015278 | 123.99889 | 24.7801 | Fractured fishpond dikes                                                                                                                                                                                                                  |
| 19-May | FC17  | Madamba                   | 9 cm    | 133 SE | rupture      | 11.990556 | 124.01667 | 28.1409 | road and fence                                                                                                                                                                                                                            |
| 19-May | FC18  | Madamba                   | 3 cm    | 133 SE | rupture      | 11.990556 | 124.01667 | 28.1409 | curb                                                                                                                                                                                                                                      |
| 19-May | FC19  | Madamba                   | 5 cm    | 296 NW | rupture      | 11.990556 | 124.01639 | 28.1233 | house inside the fence; cracked terrace with vertical disp                                                                                                                                                                                |
| 19-May | FC20  | Madamba                   | 2 cm    | 143 SE | rupture      | 11.990556 | 124.01667 | 28.1409 | house next to curb "subsided" due to detached and slanted wall                                                                                                                                                                            |
| 19-May | FC21  | Madamba                   | 30 cm   | 99 E   | rupture      | 11.990278 | 124.01694 | 28.1836 | Septic tank                                                                                                                                                                                                                               |
| 19-May | FC22  | Madamba                   | 30 cm   | 293 NW | rupture      | 11.99     | 124.01722 | 28.2263 | Fence next to septic tank                                                                                                                                                                                                                 |
| 19-May | FC23  | Concepcion, Cataingan     | n/a     | n/a    | none         | 12.015556 | 124.00611 | 25.2219 | erased                                                                                                                                                                                                                                    |
| 20-May | FC24  | Cataingan                 | n/a     | n/a    | fracture     | 12.003333 | 123.99222 | 25.4722 | road fractures with no apparent displacement; repaired with asphalt; asphalt may be showing post seismic displacement (road is 4.2m wide, line to line)                                                                                   |
| 20-May | FC25  | Cataingan                 | n/a     | n/a    | none         | 12.003056 | 123.99167 | 25.4657 | none                                                                                                                                                                                                                                      |
| 20-May | FC26a | Cataingan                 | n/a     | n/a    | fracture     | 12.001111 | 123.9875  | 25.4097 | road "uplifted" and cracked                                                                                                                                                                                                               |
| 20-May | FC26b | Cataingan                 | mm only | 19 N   | fracture     | 12.001111 | 123.9875  | 25.4097 | (cont) fracture parallel to fault                                                                                                                                                                                                         |
| 20-May | FC27  | Cataingan                 | n/a     | n/a    | fracture     | 11.999722 | 123.98806 | 25.573  | road fracture with no apparent displacement across half the road                                                                                                                                                                          |
| 20-May | FC28  | Cataingan                 | n/a     | n/a    | fracture     | 11.991389 | 123.9825  | 26.0701 | fracture across half the road, unsure if due to earthquake                                                                                                                                                                                |
| 20-May | FC29  | Cataingan                 | n/a     | n/a    | liquefaction | 11.995278 | 123.98583 | 25.8739 | several evenly spaced (4.5 m apart) fractures running across the road, no visible displacement; could be the road sections separating = spreading?; fractures ceased in front of Domorog Elem Sch then northwards up to 500m in road span |
| 20-May | FC30  | Cataingan                 | mm only | n/a    | fracture     | 11.985833 | 123.97861 | 26.4127 | several cracked road sections with minor (mm) verti disp; photo taken looking 300 NW; right side went down?                                                                                                                               |
| 20-May | FC31  | Cataingan                 | n/a     | n/a    | EIL          | 11.986667 | 123.98556 | 26.6906 | adjacent EIL river side                                                                                                                                                                                                                   |
| 20-May | FC32  | Cataingan                 | n/a     | n/a    | shaking      | 11.981667 | 123.99    | 27.4121 | ground shaking, no liquefaction accdg to residents                                                                                                                                                                                        |
| 20-May | FC33  | Cataingan                 | n/a     | n/a    | spreading    | 11.995556 | 123.99528 | 26.3804 | longitudinal fractures (about 10m length) along the road parallel to shoreline; lateral spreading? subsidence? no liquefaction                                                                                                            |
| 20-May | FC34  | Cataingan                 | n/a     | n/a    | fracture     | 12.001667 | 123.99278 | 25.6609 | (next to big house) road fractures with verti disp?; concrete patched accdg to residents                                                                                                                                                  |
| 20-May | FC35  | Cataingan                 | n/a     | n/a    | none         | 12.006111 | 123.99139 | 25.1634 | none                                                                                                                                                                                                                                      |

|        |       |            |     |     |          |           |           |         |                                                                                                                                                                                                                                                                                                                                                                                                                                                                                                                                                                                                                                                                                                                                                                                                                                                                                                                                                                                                                             |
|--------|-------|------------|-----|-----|----------|-----------|-----------|---------|-----------------------------------------------------------------------------------------------------------------------------------------------------------------------------------------------------------------------------------------------------------------------------------------------------------------------------------------------------------------------------------------------------------------------------------------------------------------------------------------------------------------------------------------------------------------------------------------------------------------------------------------------------------------------------------------------------------------------------------------------------------------------------------------------------------------------------------------------------------------------------------------------------------------------------------------------------------------------------------------------------------------------------|
| 20-May | FC36  | Cataingan  | n/a | n/a | fracture | 12.009444 | 123.98833 | 24.6719 | <p>(on the eskinita, next to the store) longitudinal fractures terraced; no liquefaction on slope face accd to land owner but water flow increased on the creek at the foot of the slope</p> <p>first side: W dipping slope; ridge perpendicular movement direction; ridge parallel displacements; fractures trend at 180 S; trees leaning towards 254 W</p> <p>(bottom part of second side) scarp terraces; photo taken looking 333 NW; fractures striking similarly 333 NW; dip direction 63 NE; 30-45 dip angle with 1m scarp face</p> <p>(middle part) smaller displacement on this slope evidenced by less bend on trees</p> <p>(top) largest scarps of approx 2m height; ampitheater scarp about 100m width East dipping in the middle, sides are S and N dipping respectively</p> <p>combined, seems to form a circular pattern with central depression</p> <p>limestone (blocky, fractured) floats seen on regolith</p> <p>no fractures were seen on the road adjacent to the slopes (road was built before EQ)</p> |
| 20-May | FC37a | Concepcion | n/a | n/a | sinkhole | 12.008611 | 124.01917 | 26.7035 |                                                                                                                                                                                                                                                                                                                                                                                                                                                                                                                                                                                                                                                                                                                                                                                                                                                                                                                                                                                                                             |
|        |       |            |     |     |          | 12.008611 | 124.01917 | 26.7035 |                                                                                                                                                                                                                                                                                                                                                                                                                                                                                                                                                                                                                                                                                                                                                                                                                                                                                                                                                                                                                             |

## S2.2 Photos

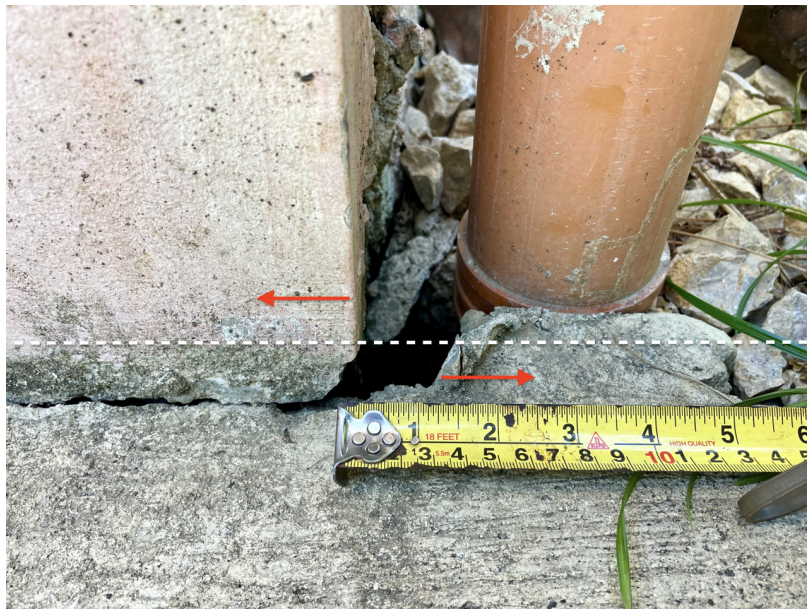

Figure S7: Pt FP1a. House separated from exterior slab showing sinistral offset.

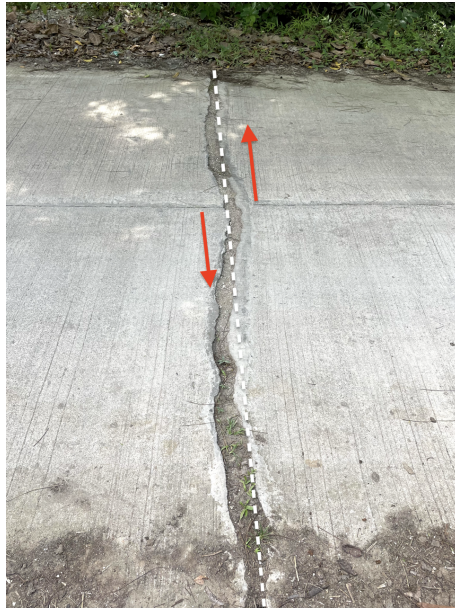

Figure S8: Pt FP5. Ruptured road section showing sinistral offset and perpendicular separation. Point is visible in OIC.

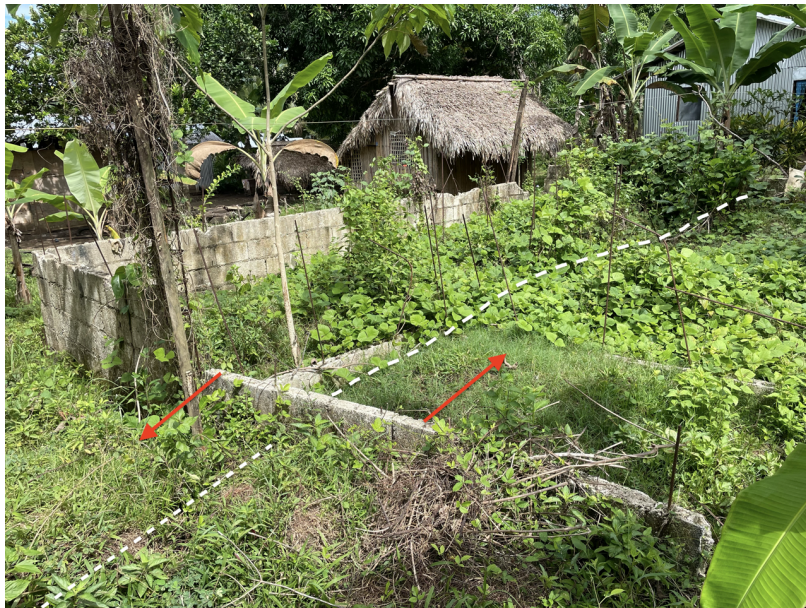

Figure S9: Pt FC4a. Unfinished house traversed by fault with deflected wall.



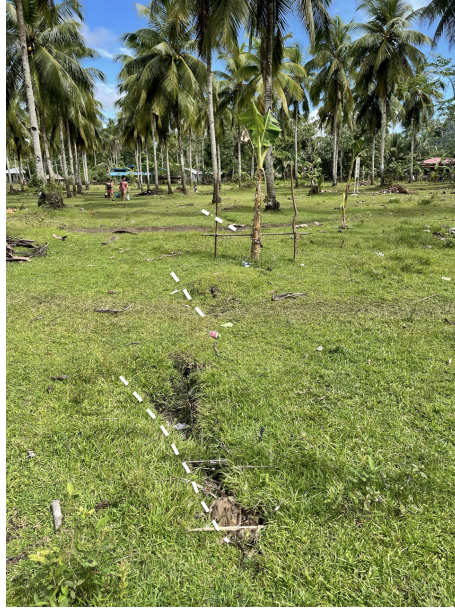

Figure S10: Pt FC5. Right stepping en echelon fissures along the fault trace near the unfinished house.

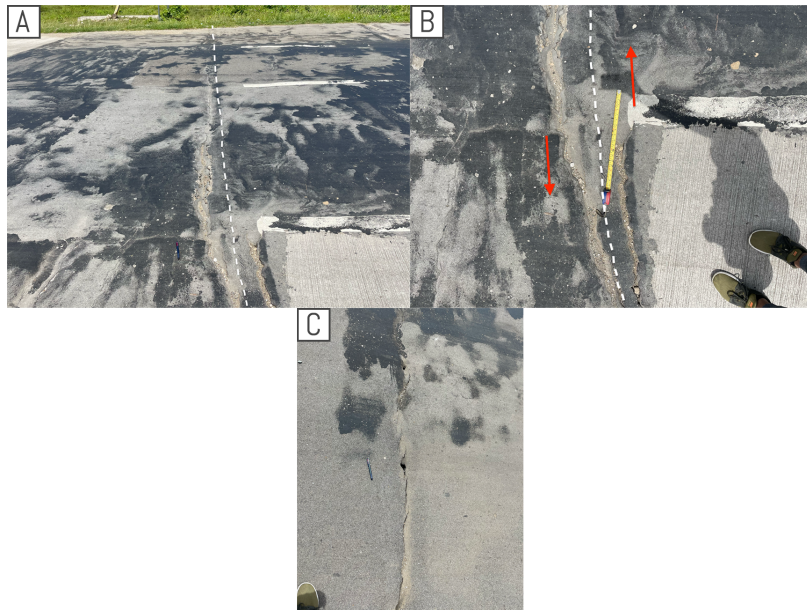

Figure S11: Pt FC11. Road traversed by fault segment that is already repaired at the time of visit. Post-seismic deformation may be seen on the asphalt.

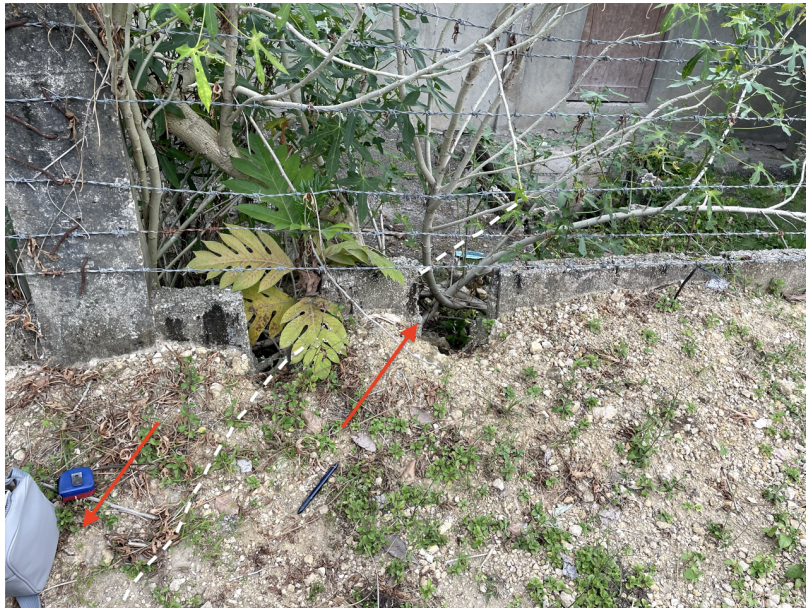

Figure S12: Pt FC22. Fence adjacent to the septic tank showing sinistral offset.

### S3 Earthquake Catalog

Table S5: Event seismicity

| Date      | Time (PHT) | Latitude (°N) | Longitude (°E) | Depth (km) | Magnitude | DataSource |
|-----------|------------|---------------|----------------|------------|-----------|------------|
| 1-Jan-19  | 11:39 PM   | 12.58         | 123.45         | 24         | 1.9       | PHIVOLCS   |
| 2-Jan-19  | 11:35 PM   | 12.87         | 122.78         | 21         | 2.9       | PHIVOLCS   |
| 4-Jan-19  | 4:51 AM    | 11.93         | 124.12         | 1          | 2         | PHIVOLCS   |
| 5-Jan-19  | 9:05 PM    | 12.44         | 123.65         | 6          | 4         | PHIVOLCS   |
| 7-Jan-19  | 6:01 AM    | 12.67         | 123.5          | 1          | 3.2       | PHIVOLCS   |
| 10-Jan-19 | 5:46 PM    | 12.74         | 123.22         | 17         | 2.5       | PHIVOLCS   |
| 11-Jan-19 | 12:29 AM   | 12.47         | 123.63         | 5          | 2.6       | PHIVOLCS   |
| 14-Jan-19 | 2:39 PM    | 12.73         | 123.52         | 6          | 3         | PHIVOLCS   |
| 17-Jan-19 | 12:39 AM   | 12.55         | 123.61         | 4          | 2.5       | PHIVOLCS   |
| 30-Jan-19 | 11:49 PM   | 12.91         | 122.87         | 26         | 2.9       | PHIVOLCS   |
| 5-Feb-19  | 11:17 PM   | 12.84         | 122.89         | 3          | 2.7       | PHIVOLCS   |
| 12-Feb-19 | 6:47 PM    | 12.77         | 122.92         | 22         | 2.3       | PHIVOLCS   |
| 18-Feb-19 | 11:24 PM   | 12.96         | 122.92         | 8          | 2.3       | PHIVOLCS   |
| 23-Feb-19 | 7:59 PM    | 12.4          | 123.74         | 8          | 2.5       | PHIVOLCS   |
| 26-Feb-19 | 5:31 PM    | 11.94         | 124.04         | 5          | 2.8       | PHIVOLCS   |
| 28-Feb-19 | 1:36 PM    | 11.95         | 124.06         | 2          | 3.7       | PHIVOLCS   |
| 1-Mar-19  | 9:00 AM    | 11.96         | 124.23         | 1          | 2.5       | PHIVOLCS   |
| 4-Mar-19  | 12:35 PM   | 12.89         | 122.84         | 19         | 2.6       | PHIVOLCS   |
| 8-Mar-19  | 3:15 AM    | 12.9          | 122.97         | 6          | 2         | PHIVOLCS   |
| 8-Mar-19  | 5:47 PM    | 12.81         | 123.07         | 7          | 2.3       | PHIVOLCS   |
| 8-Mar-19  | 10:36 PM   | 12.75         | 123.45         | 11         | 2.8       | PHIVOLCS   |
| 19-Mar-19 | 4:35 PM    | 11.83         | 124.17         | 18         | 3         | PHIVOLCS   |
| 20-Mar-19 | 1:12 PM    | 11.95         | 124.23         | 1          | 2.7       | PHIVOLCS   |
| 31-Mar-19 | 12:57 AM   | 12.81         | 122.96         | 11         | 2.1       | PHIVOLCS   |
| 3-Apr-19  | 5:48 AM    | 12.61         | 123.51         | 7          | 3.7       | PHIVOLCS   |
| 3-Apr-19  | 3:56 PM    | 12.88         | 122.87         | 28         | 2.3       | PHIVOLCS   |
| 4-Apr-19  | 3:55 AM    | 12.77         | 122.99         | 1          | 2.4       | PHIVOLCS   |
| 4-Apr-19  | 10:54 AM   | 12.92         | 122.88         | 5          | 2.5       | PHIVOLCS   |
| 7-Apr-19  | 8:29 PM    | 12.47         | 123.75         | 17         | 1.8       | PHIVOLCS   |
| 10-Apr-19 | 5:16 AM    | 12.43         | 123.67         | 11         | 2.5       | PHIVOLCS   |
| 12-Apr-19 | 7:06 PM    | 12.25         | 123.92         | 13         | 2.4       | PHIVOLCS   |
| 13-Apr-19 | 5:34 AM    | 12.36         | 123.72         | 9          | 3.2       | PHIVOLCS   |
| 17-Apr-19 | 5:50 PM    | 12.81         | 123.48         | 10         | 2.3       | PHIVOLCS   |
| 19-Apr-19 | 11:13 AM   | 11.84         | 124.24         | 7          | 2.6       | PHIVOLCS   |
| 21-Apr-19 | 8:58 AM    | 12.19         | 123.86         | 2          | 2.7       | PHIVOLCS   |
| 26-Apr-19 | 12:38 AM   | 12.54         | 123.69         | 11         | 2.4       | PHIVOLCS   |
| 28-Apr-19 | 6:56 PM    | 11.81         | 124.32         | 3          | 2.8       | PHIVOLCS   |
| 1-May-19  | 12:50 AM   | 13.2          | 123.01         | 7          | 2.4       | PHIVOLCS   |
| 13-May-19 | 3:41 PM    | 11.81         | 124.22         | 1          | 2.4       | PHIVOLCS   |
| 16-May-19 | 1:37 AM    | 12.24         | 123.84         | 13         | 3.2       | PHIVOLCS   |
| 16-May-19 | 9:48 PM    | 11.93         | 124.1          | 1          | 2.6       | PHIVOLCS   |
| 17-May-19 | 12:38 PM   | 12.77         | 123            | 3          | 2.1       | PHIVOLCS   |
| 19-May-19 | 8:36 PM    | 12.72         | 123.17         | 1          | 3.7       | PHIVOLCS   |
| 20-May-19 | 6:45 AM    | 11.91         | 124.06         | 11         | 4.4       | PHIVOLCS   |
| 21-May-19 | 4:51 PM    | 12.78         | 123.33         | 18         | 2.9       | PHIVOLCS   |
| 1-Jun-19  | 4:35 AM    | 12.6          | 123.48         | 7          | 3         | PHIVOLCS   |
| 3-Jun-19  | 5:42 PM    | 12.37         | 123.72         | 7          | 4.3       | PHIVOLCS   |
| 3-Jun-19  | 6:56 PM    | 12.31         | 123.78         | 1          | 2.9       | PHIVOLCS   |

|           |          |       |        |    |     |          |
|-----------|----------|-------|--------|----|-----|----------|
| 4-Jun-19  | 12:08 AM | 12.4  | 123.78 | 6  | 3.1 | PHIVOLCS |
| 5-Jun-19  | 3:25 AM  | 12.01 | 124.01 | 18 | 2.6 | PHIVOLCS |
| 7-Jun-19  | 7:24 AM  | 12.48 | 123.76 | 32 | 3.1 | PHIVOLCS |
| 7-Jun-19  | 9:42 PM  | 12.31 | 123.77 | 1  | 3   | PHIVOLCS |
| 7-Jun-19  | 9:46 PM  | 12.38 | 123.74 | 11 | 2.7 | PHIVOLCS |
| 8-Jun-19  | 8:20 PM  | 12.43 | 123.86 | 31 | 3.3 | PHIVOLCS |
| 12-Jun-19 | 4:19 AM  | 12.32 | 123.73 | 6  | 3.3 | PHIVOLCS |
| 12-Jun-19 | 5:03 AM  | 12.35 | 123.71 | 7  | 4.4 | PHIVOLCS |
| 12-Jun-19 | 5:08 AM  | 12.43 | 123.79 | 17 | 2.2 | PHIVOLCS |
| 12-Jun-19 | 5:09 AM  | 12.41 | 123.72 | 6  | 3   | PHIVOLCS |
| 12-Jun-19 | 5:15 AM  | 12.4  | 123.76 | 3  | 2.8 | PHIVOLCS |
| 12-Jun-19 | 5:36 AM  | 12.38 | 123.73 | 13 | 3.2 | PHIVOLCS |
| 12-Jun-19 | 6:24 AM  | 12.46 | 123.61 | 22 | 2.1 | PHIVOLCS |
| 12-Jun-19 | 7:02 AM  | 12.31 | 123.74 | 8  | 4.1 | PHIVOLCS |
| 12-Jun-19 | 3:54 PM  | 12.42 | 123.59 | 31 | 2.5 | PHIVOLCS |
| 13-Jun-19 | 11:43 AM | 12.34 | 123.76 | 24 | 2.3 | PHIVOLCS |
| 13-Jun-19 | 6:53 PM  | 11.93 | 124.06 | 3  | 3.3 | PHIVOLCS |
| 13-Jun-19 | 11:43 PM | 12.31 | 123.81 | 2  | 2.3 | PHIVOLCS |
| 14-Jun-19 | 1:19 AM  | 11.92 | 124.1  | 1  | 3   | PHIVOLCS |
| 14-Jun-19 | 1:37 AM  | 11.9  | 124.05 | 1  | 2.3 | PHIVOLCS |
| 14-Jun-19 | 1:42 AM  | 11.91 | 124.1  | 1  | 2.8 | PHIVOLCS |
| 14-Jun-19 | 2:11 AM  | 12.46 | 123.73 | 24 | 2.6 | PHIVOLCS |
| 14-Jun-19 | 5:39 AM  | 11.93 | 124.04 | 4  | 1.8 | PHIVOLCS |
| 14-Jun-19 | 4:38 PM  | 12.62 | 123.62 | 27 | 2.9 | PHIVOLCS |
| 26-Jun-19 | 12:30 AM | 12.44 | 123.63 | 21 | 1.8 | PHIVOLCS |
| 26-Jun-19 | 1:45 AM  | 12.39 | 123.65 | 12 | 2.2 | PHIVOLCS |
| 10-Jul-19 | 3:38 AM  | 12.84 | 123.54 | 5  | 3.1 | PHIVOLCS |
| 10-Jul-19 | 10:37 PM | 11.92 | 124.1  | 1  | 2.1 | PHIVOLCS |
| 11-Jul-19 | 12:58 AM | 11.86 | 124.13 | 9  | 3.2 | PHIVOLCS |
| 11-Jul-19 | 1:46 AM  | 11.9  | 124.11 | 21 | 2.2 | PHIVOLCS |
| 16-Jul-19 | 3:42 AM  | 11.78 | 124.2  | 7  | 2.8 | PHIVOLCS |
| 21-Jul-19 | 6:35 PM  | 11.67 | 124.15 | 3  | 2.3 | PHIVOLCS |
| 29-Jul-19 | 7:07 PM  | 12.15 | 124.03 | 7  | 3.2 | PHIVOLCS |
| 25-Aug-19 | 4:31 AM  | 11.95 | 123.95 | 28 | 2   | PHIVOLCS |
| 30-Aug-19 | 2:48 AM  | 12.88 | 122.89 | 14 | 1.9 | PHIVOLCS |
| 31-Aug-19 | 9:44 PM  | 11.86 | 124.23 | 1  | 2.4 | PHIVOLCS |
| 2-Sep-19  | 11:10 AM | 12.04 | 124.01 | 16 | 4   | PHIVOLCS |
| 2-Sep-19  | 11:33 AM | 12.08 | 124    | 17 | 1.9 | PHIVOLCS |
| 3-Sep-19  | 11:41 AM | 11.99 | 123.99 | 2  | 3   | PHIVOLCS |
| 3-Sep-19  | 11:43 AM | 12.24 | 124.04 | 89 | 2.6 | PHIVOLCS |
| 4-Sep-19  | 11:21 PM | 12.1  | 123.92 | 1  | 2.1 | PHIVOLCS |
| 14-Sep-19 | 11:20 PM | 12.54 | 123.73 | 50 | 2.3 | PHIVOLCS |
| 16-Sep-19 | 6:54 AM  | 12    | 124    | 1  | 2.2 | PHIVOLCS |
| 17-Sep-19 | 9:23 PM  | 11.86 | 124.11 | 7  | 2.4 | PHIVOLCS |
| 28-Sep-19 | 5:22 PM  | 12.85 | 123.38 | 33 | 2.7 | PHIVOLCS |
| 6-Oct-19  | 9:51 AM  | 12.98 | 122.68 | 1  | 3   | PHIVOLCS |
| 7-Oct-19  | 7:24 PM  | 12.73 | 123.59 | 6  | 2.9 | PHIVOLCS |
| 10-Oct-19 | 11:20 AM | 11.74 | 124.19 | 18 | 2.4 | PHIVOLCS |
| 11-Oct-19 | 11:37 AM | 11.83 | 124.14 | 9  | 2.8 | PHIVOLCS |
| 14-Oct-19 | 5:18 PM  | 12.89 | 123.29 | 2  | 2.7 | PHIVOLCS |
| 16-Oct-19 | 1:45 AM  | 12.93 | 123.34 | 4  | 3   | PHIVOLCS |
| 3-Nov-19  | 11:19 PM | 12.99 | 123.21 | 21 | 2.3 | PHIVOLCS |
| 4-Nov-19  | 7:01 AM  | 12.44 | 123.38 | 2  | 2.8 | PHIVOLCS |
| 11-Nov-19 | 11:26 PM | 12.93 | 122.88 | 11 | 3   | PHIVOLCS |
| 23-Nov-19 | 11:04 AM | 11.94 | 124.01 | 2  | 4.2 | PHIVOLCS |
| 23-Nov-19 | 11:36 AM | 11.92 | 124.04 | 2  | 3.5 | PHIVOLCS |

|           |          |       |        |     |     |          |
|-----------|----------|-------|--------|-----|-----|----------|
| 25-Nov-19 | 6:16 AM  | 12.21 | 123.65 | 48  | 2.4 | PHIVOLCS |
| 25-Nov-19 | 9:31 AM  | 12.02 | 124    | 1   | 2.1 | PHIVOLCS |
| 17-Dec-19 | 8:35 AM  | 11.98 | 124.07 | 7   | 2.7 | PHIVOLCS |
| 18-Jan-20 | 10:33 AM | 11.93 | 124.14 | 1   | 2.4 | PHIVOLCS |
| 23-Jan-20 | 9:05 PM  | 12.64 | 123.34 | 13  | 4.6 | PHIVOLCS |
| 24-Jan-20 | 6:36 AM  | 12.54 | 123.6  | 1   | 2.8 | PHIVOLCS |
| 29-Jan-20 | 8:53 AM  | 11.93 | 124.05 | 0   | 2   | PHIVOLCS |
| 30-Jan-20 | 5:50 PM  | 11.85 | 124.13 | 6   | 2.8 | PHIVOLCS |
| 3-Feb-20  | 1:00 AM  | 12.68 | 123.57 | 4   | 2.4 | PHIVOLCS |
| 3-Feb-20  | 2:20 AM  | 12.69 | 123.53 | 5   | 2.9 | PHIVOLCS |
| 16-Mar-20 | 6:07 AM  | 12.81 | 123.01 | 4   | 3.9 | PHIVOLCS |
| 21-Mar-20 | 5:01 AM  | 12.49 | 123.59 | 3   | 3.1 | PHIVOLCS |
| 21-Mar-20 | 7:57 PM  | 12.45 | 123.67 | 1   | 1.8 | PHIVOLCS |
| 22-Mar-20 | 3:04 AM  | 12.52 | 123.56 | 1   | 2.3 | PHIVOLCS |
| 22-Mar-20 | 5:45 PM  | 12.71 | 123.67 | 1   | 1.9 | PHIVOLCS |
| 22-Mar-20 | 8:50 PM  | 12.52 | 123.53 | 1   | 3.4 | PHIVOLCS |
| 23-Mar-20 | 7:51 AM  | 13.18 | 122.83 | 107 | 2.1 | PHIVOLCS |
| 24-Mar-20 | 1:51 AM  | 11.73 | 124.27 | 8   | 2.4 | PHIVOLCS |
| 1-Apr-20  | 11:15 PM | 12.74 | 123.38 | 4   | 3   | PHIVOLCS |
| 14-Apr-20 | 11:21 PM | 12.33 | 123.72 | 3   | 3.5 | PHIVOLCS |
| 26-Apr-20 | 12:49 AM | 11.95 | 124.05 | 17  | 2.6 | PHIVOLCS |
| 29-Apr-20 | 8:26 AM  | 12.58 | 123.53 | 5   | 2.1 | PHIVOLCS |
| 2-May-20  | 4:12 AM  | 12.44 | 123.7  | 13  | 2.3 | PHIVOLCS |
| 6-May-20  | 6:20 PM  | 12.9  | 122.6  | 16  | 2.2 | PHIVOLCS |
| 9-May-20  | 12:56 PM | 12.76 | 123.4  | 11  | 2.9 | PHIVOLCS |
| 9-May-20  | 1:21 PM  | 12.86 | 123.45 | 14  | 3   | PHIVOLCS |
| 10-May-20 | 2:39 AM  | 12.73 | 123.41 | 2   | 3.3 | PHIVOLCS |
| 10-May-20 | 3:56 AM  | 12.74 | 123.39 | 6   | 4.2 | PHIVOLCS |
| 12-May-20 | 11:23 PM | 12.76 | 123.45 | 5   | 2.6 | PHIVOLCS |
| 13-May-20 | 2:47 AM  | 12.76 | 123.41 | 6   | 3.4 | PHIVOLCS |
| 13-May-20 | 11:01 PM | 12.78 | 123.09 | 4   | 1.5 | PHIVOLCS |
| 14-May-20 | 5:41 PM  | 12.68 | 123.32 | 35  | 2.1 | PHIVOLCS |
| 15-May-20 | 11:13 AM | 12.01 | 124.03 | 15  | 2.4 | PHIVOLCS |
| 22-May-20 | 2:12 AM  | 11.86 | 124.15 | 1   | 2   | PHIVOLCS |
| 23-May-20 | 5:19 AM  | 11.75 | 124.18 | 23  | 1.6 | PHIVOLCS |
| 24-May-20 | 10:55 AM | 11.9  | 124.33 | 5   | 2.9 | PHIVOLCS |
| 31-May-20 | 1:18 AM  | 11.87 | 124.14 | 1   | 2.4 | PHIVOLCS |
| 8-Jun-20  | 2:58 AM  | 12.81 | 122.93 | 11  | 2.9 | PHIVOLCS |
| 11-Jun-20 | 10:52 PM | 12.22 | 124.03 | 79  | 2.5 | PHIVOLCS |
| 15-Jun-20 | 7:26 AM  | 11.73 | 124.26 | 12  | 2.6 | PHIVOLCS |
| 16-Jun-20 | 5:36 PM  | 12.63 | 123.52 | 9   | 2.5 | PHIVOLCS |
| 17-Jun-20 | 6:53 PM  | 12.29 | 123.85 | 27  | 2   | PHIVOLCS |
| 17-Jun-20 | 10:03 PM | 12.37 | 123.75 | 16  | 2.1 | PHIVOLCS |
| 18-Jun-20 | 3:23 AM  | 12.41 | 123.79 | 19  | 1.9 | PHIVOLCS |
| 24-Jun-20 | 5:37 AM  | 12.98 | 123.24 | 71  | 1.9 | PHIVOLCS |
| 24-Jun-20 | 11:25 PM | 12.8  | 123.14 | 30  | 2   | PHIVOLCS |
| 5-Jul-20  | 12:46 PM | 12.67 | 123.59 | 34  | 2.3 | PHIVOLCS |
| 5-Jul-20  | 5:56 PM  | 12.85 | 122.62 | 29  | 2.1 | PHIVOLCS |
| 10-Jul-20 | 9:46 AM  | 11.94 | 124.08 | 1   | 3.3 | PHIVOLCS |
| 10-Jul-20 | 10:01 AM | 12.25 | 123.89 | 70  | 2.8 | PHIVOLCS |
| 10-Jul-20 | 10:25 AM | 12.01 | 124.06 | 16  | 2.9 | PHIVOLCS |
| 10-Jul-20 | 11:35 AM | 12.02 | 124.04 | 21  | 3   | PHIVOLCS |
| 19-Jul-20 | 9:26 AM  | 12.6  | 123.72 | 27  | 2.2 | PHIVOLCS |
| 21-Jul-20 | 11:17 AM | 12.87 | 123.43 | 23  | 2.7 | PHIVOLCS |
| 2-Aug-20  | 8:44 PM  | 12.82 | 123.42 | 7   | 2.2 | PHIVOLCS |
| 4-Aug-20  | 2:18 AM  | 11.69 | 124.19 | 28  | 2.9 | PHIVOLCS |

|           |          |         |          |    |     |            |
|-----------|----------|---------|----------|----|-----|------------|
| 10-Aug-20 | 11:32 AM | 12.57   | 123.49   | 2  | 2.9 | PHIVOLCS   |
| 11-Aug-20 | 4:43 AM  | 11.93   | 124.04   | 6  | 4   | PHIVOLCS   |
| 11-Aug-20 | 3:26 PM  | 11.95   | 124.05   | 7  | 4.9 | PHIVOLCS   |
| 12-Aug-20 | 4:50 PM  | 11.93   | 124.08   | 1  | 2.5 | PHIVOLCS   |
| 12-Aug-20 | 7:41 PM  | 11.92   | 124.02   | 28 | 2.2 | PHIVOLCS   |
| 14-Aug-20 | 8:24 PM  | 12.02   | 124.03   | 17 | 3.1 | PHIVOLCS   |
| 15-Aug-20 | 8:07 PM  | 11.98   | 124.06   | 8  | 2   | PHIVOLCS   |
| 16-Aug-20 | 5:05 PM  | 12.83   | 123.36   | 6  | 3.3 | PHIVOLCS   |
| 17-Aug-20 | 1:21 PM  | 11.93   | 123.98   | 9  | 4.6 | PHIVOLCS   |
| 17-Aug-20 | 1:23 PM  | 11.99   | 124.06   | 6  | 2.9 | PHIVOLCS   |
| 17-Aug-20 | 1:33 PM  | 11.89   | 124.27   | 15 | 2.4 | PHIVOLCS   |
| 17-Aug-20 | 1:49 PM  | 11.95   | 124.03   | 4  | 3.5 | PHIVOLCS   |
| 17-Aug-20 | 2:05 PM  | 12.1    | 123.87   | 36 | 2.5 | PHIVOLCS   |
| 17-Aug-20 | 5:19 PM  | 11.93   | 124.05   | 4  | 3.2 | PHIVOLCS   |
| 18-Aug-20 | 8:03 AM  | 11.98   | 124.01   | 13 | 6.6 | PHIVOLCS   |
| 18-Aug-20 | 8:03 AM  | 12.0257 | 124.1272 | 10 | 6.6 | USGS       |
| 18-Aug-20 | 8:03 AM  | 12.04   | 123.98   | 12 | 6.6 | Global CMT |
| 18-Aug-20 | 8:23 AM  | 12.13   | 123.95   | 15 | 4.1 | PHIVOLCS   |
| 18-Aug-20 | 8:28 AM  | 12.14   | 123.96   | 16 | 3.1 | PHIVOLCS   |
| 18-Aug-20 | 8:40 AM  | 11.96   | 124.03   | 3  | 3.7 | PHIVOLCS   |
| 18-Aug-20 | 8:53 AM  | 11.94   | 124.07   | 15 | 3.6 | PHIVOLCS   |
| 18-Aug-20 | 9:08 AM  | 11.94   | 124.09   | 15 | 3.2 | PHIVOLCS   |
| 18-Aug-20 | 9:11 AM  | 11.88   | 124.12   | 22 | 3.1 | PHIVOLCS   |
| 18-Aug-20 | 9:13 AM  | 11.87   | 124.17   | 1  | 2.1 | PHIVOLCS   |
| 18-Aug-20 | 9:24 AM  | 11.9    | 124.13   | 8  | 2   | PHIVOLCS   |
| 18-Aug-20 | 9:25 AM  | 11.84   | 124.16   | 12 | 3.4 | PHIVOLCS   |
| 18-Aug-20 | 9:28 AM  | 11.89   | 124.1    | 10 | 3.4 | PHIVOLCS   |
| 18-Aug-20 | 9:33 AM  | 12.1    | 123.99   | 24 | 2.5 | PHIVOLCS   |
| 18-Aug-20 | 9:42 AM  | 12.21   | 123.89   | 19 | 3.5 | PHIVOLCS   |
| 18-Aug-20 | 9:49 AM  | 11.83   | 124.13   | 13 | 3.8 | PHIVOLCS   |
| 18-Aug-20 | 10:01 AM | 12.19   | 123.92   | 25 | 3.3 | PHIVOLCS   |
| 18-Aug-20 | 10:06 AM | 11.98   | 124.12   | 1  | 2.8 | PHIVOLCS   |
| 18-Aug-20 | 10:21 AM | 11.91   | 124.02   | 18 | 2.3 | PHIVOLCS   |
| 18-Aug-20 | 10:34 AM | 11.91   | 124.16   | 14 | 2.9 | PHIVOLCS   |
| 18-Aug-20 | 10:45 AM | 11.88   | 124.07   | 28 | 2.6 | PHIVOLCS   |
| 18-Aug-20 | 10:47 AM | 11.83   | 124.15   | 1  | 3.4 | PHIVOLCS   |
| 18-Aug-20 | 11:04 AM | 11.88   | 124.14   | 1  | 2.8 | PHIVOLCS   |
| 18-Aug-20 | 11:18 AM | 11.95   | 123.78   | 1  | 2.3 | PHIVOLCS   |
| 18-Aug-20 | 11:20 AM | 12.04   | 123.94   | 19 | 1.9 | PHIVOLCS   |
| 18-Aug-20 | 11:21 AM | 11.98   | 124.02   | 1  | 2.6 | PHIVOLCS   |
| 18-Aug-20 | 11:45 AM | 11.98   | 124      | 7  | 3.2 | PHIVOLCS   |
| 18-Aug-20 | 11:51 AM | 12.06   | 123.98   | 23 | 3.1 | PHIVOLCS   |
| 18-Aug-20 | 12:11 PM | 11.87   | 124.02   | 27 | 2.7 | PHIVOLCS   |
| 18-Aug-20 | 12:48 PM | 11.99   | 124.01   | 23 | 2.3 | PHIVOLCS   |
| 18-Aug-20 | 12:54 PM | 11.99   | 124.05   | 5  | 3.1 | PHIVOLCS   |
| 18-Aug-20 | 12:58 PM | 12.09   | 124.01   | 22 | 1.8 | PHIVOLCS   |
| 18-Aug-20 | 1:08 PM  | 11.97   | 124.05   | 24 | 2   | PHIVOLCS   |
| 18-Aug-20 | 1:15 PM  | 11.97   | 124.07   | 11 | 3.8 | PHIVOLCS   |
| 18-Aug-20 | 2:52 PM  | 11.94   | 124.08   | 27 | 2.7 | PHIVOLCS   |
| 18-Aug-20 | 2:57 PM  | 11.98   | 123.77   | 25 | 2.8 | PHIVOLCS   |
| 18-Aug-20 | 3:03 PM  | 12.04   | 123.88   | 3  | 2.8 | PHIVOLCS   |
| 18-Aug-20 | 3:24 PM  | 11.83   | 124.11   | 1  | 3.9 | PHIVOLCS   |
| 18-Aug-20 | 3:42 PM  | 11.97   | 124.09   | 8  | 3.7 | PHIVOLCS   |
| 18-Aug-20 | 4:04 PM  | 11.97   | 124.03   | 11 | 4.2 | PHIVOLCS   |
| 18-Aug-20 | 4:15 PM  | 11.86   | 124.13   | 7  | 2.5 | PHIVOLCS   |
| 18-Aug-20 | 4:16 PM  | 12.2    | 123.94   | 27 | 2.2 | PHIVOLCS   |

|           |          |       |        |    |     |          |
|-----------|----------|-------|--------|----|-----|----------|
| 18-Aug-20 | 4:17 PM  | 12.09 | 123.65 | 38 | 2.4 | PHIVOLCS |
| 18-Aug-20 | 4:28 PM  | 11.88 | 124.11 | 14 | 3.1 | PHIVOLCS |
| 18-Aug-20 | 4:31 PM  | 11.94 | 124.04 | 22 | 2.2 | PHIVOLCS |
| 18-Aug-20 | 4:46 PM  | 11.86 | 124.07 | 1  | 2.5 | PHIVOLCS |
| 18-Aug-20 | 4:48 PM  | 11.85 | 124.22 | 5  | 3   | PHIVOLCS |
| 18-Aug-20 | 5:20 PM  | 11.85 | 124.07 | 2  | 3.6 | PHIVOLCS |
| 18-Aug-20 | 5:22 PM  | 11.85 | 124.13 | 1  | 3   | PHIVOLCS |
| 18-Aug-20 | 5:42 PM  | 11.91 | 124.12 | 4  | 3.4 | PHIVOLCS |
| 18-Aug-20 | 5:46 PM  | 11.88 | 124.11 | 12 | 3.2 | PHIVOLCS |
| 18-Aug-20 | 5:49 PM  | 12.09 | 123.83 | 50 | 2.4 | PHIVOLCS |
| 18-Aug-20 | 5:57 PM  | 11.84 | 124.16 | 6  | 2.7 | PHIVOLCS |
| 18-Aug-20 | 6:00 PM  | 11.87 | 124.16 | 16 | 2.9 | PHIVOLCS |
| 18-Aug-20 | 6:05 PM  | 11.89 | 124.21 | 19 | 2.8 | PHIVOLCS |
| 18-Aug-20 | 6:18 PM  | 11.91 | 124.07 | 2  | 4.4 | PHIVOLCS |
| 18-Aug-20 | 6:38 PM  | 11.89 | 124.09 | 17 | 2.6 | PHIVOLCS |
| 18-Aug-20 | 6:48 PM  | 11.91 | 124.1  | 16 | 2.6 | PHIVOLCS |
| 18-Aug-20 | 6:59 PM  | 12.04 | 124.07 | 6  | 2.5 | PHIVOLCS |
| 18-Aug-20 | 7:14 PM  | 11.93 | 123.91 | 25 | 2.7 | PHIVOLCS |
| 18-Aug-20 | 7:21 PM  | 12.01 | 124.05 | 15 | 3.9 | PHIVOLCS |
| 18-Aug-20 | 7:29 PM  | 12.04 | 124.04 | 7  | 3.3 | PHIVOLCS |
| 18-Aug-20 | 7:31 PM  | 12    | 124.09 | 7  | 2.5 | PHIVOLCS |
| 18-Aug-20 | 7:33 PM  | 11.89 | 124.16 | 2  | 3.1 | PHIVOLCS |
| 18-Aug-20 | 7:46 PM  | 11.83 | 124.13 | 8  | 2.9 | PHIVOLCS |
| 18-Aug-20 | 7:58 PM  | 11.89 | 124.17 | 1  | 2.6 | PHIVOLCS |
| 18-Aug-20 | 8:02 PM  | 11.91 | 124.02 | 1  | 2   | PHIVOLCS |
| 18-Aug-20 | 8:09 PM  | 11.93 | 124.11 | 33 | 2.4 | PHIVOLCS |
| 18-Aug-20 | 8:17 PM  | 12.1  | 123.96 | 24 | 1.9 | PHIVOLCS |
| 18-Aug-20 | 8:24 PM  | 12.07 | 123.93 | 24 | 2.1 | PHIVOLCS |
| 18-Aug-20 | 8:25 PM  | 12.25 | 123.89 | 71 | 1.9 | PHIVOLCS |
| 18-Aug-20 | 8:29 PM  | 11.8  | 124.2  | 1  | 2.8 | PHIVOLCS |
| 18-Aug-20 | 8:48 PM  | 12.02 | 124.08 | 10 | 2.2 | PHIVOLCS |
| 18-Aug-20 | 8:59 PM  | 11.9  | 124.01 | 21 | 2.8 | PHIVOLCS |
| 18-Aug-20 | 9:13 PM  | 11.89 | 124    | 28 | 2.4 | PHIVOLCS |
| 18-Aug-20 | 9:23 PM  | 11.94 | 124    | 3  | 2   | PHIVOLCS |
| 18-Aug-20 | 9:43 PM  | 11.85 | 123.94 | 25 | 2.6 | PHIVOLCS |
| 18-Aug-20 | 9:47 PM  | 12.03 | 124.08 | 18 | 2.1 | PHIVOLCS |
| 18-Aug-20 | 9:55 PM  | 12.1  | 123.95 | 12 | 3.5 | PHIVOLCS |
| 18-Aug-20 | 10:01 PM | 11.93 | 124.07 | 2  | 3   | PHIVOLCS |
| 18-Aug-20 | 10:18 PM | 12.08 | 124    | 22 | 2.9 | PHIVOLCS |
| 18-Aug-20 | 10:28 PM | 11.86 | 124.11 | 9  | 3.7 | PHIVOLCS |
| 18-Aug-20 | 10:38 PM | 11.86 | 124.2  | 5  | 2.1 | PHIVOLCS |
| 18-Aug-20 | 10:40 PM | 11.84 | 124.01 | 23 | 2.1 | PHIVOLCS |
| 18-Aug-20 | 10:55 PM | 11.88 | 124.1  | 7  | 2.8 | PHIVOLCS |
| 18-Aug-20 | 10:58 PM | 11.86 | 124.14 | 7  | 3.3 | PHIVOLCS |
| 18-Aug-20 | 11:01 PM | 12.15 | 123.93 | 15 | 3   | PHIVOLCS |
| 18-Aug-20 | 11:15 PM | 12.81 | 123.33 | 12 | 3.4 | PHIVOLCS |
| 18-Aug-20 | 11:17 PM | 12.84 | 123.36 | 8  | 2.9 | PHIVOLCS |
| 18-Aug-20 | 11:23 PM | 11.86 | 124.16 | 1  | 3.6 | PHIVOLCS |
| 18-Aug-20 | 11:27 PM | 11.81 | 124.13 | 1  | 3.4 | PHIVOLCS |
| 18-Aug-20 | 11:38 PM | 11.85 | 124.11 | 2  | 3.1 | PHIVOLCS |
| 18-Aug-20 | 11:40 PM | 11.88 | 124.1  | 15 | 3.5 | PHIVOLCS |
| 18-Aug-20 | 11:56 PM | 12.04 | 123.99 | 12 | 3.3 | PHIVOLCS |
| 19-Aug-20 | 12:21 AM | 12.01 | 123.73 | 57 | 2.3 | PHIVOLCS |
| 19-Aug-20 | 12:31 AM | 12.03 | 124.05 | 13 | 2.5 | PHIVOLCS |
| 19-Aug-20 | 12:45 AM | 11.85 | 124.15 | 6  | 2.3 | PHIVOLCS |
| 19-Aug-20 | 12:46 AM | 12.19 | 123.94 | 17 | 3.7 | PHIVOLCS |

|           |          |       |        |    |     |          |
|-----------|----------|-------|--------|----|-----|----------|
| 19-Aug-20 | 1:00 AM  | 11.93 | 124.11 | 1  | 2.9 | PHIVOLCS |
| 19-Aug-20 | 1:03 AM  | 11.89 | 124.08 | 0  | 2.2 | PHIVOLCS |
| 19-Aug-20 | 1:05 AM  | 11.87 | 124.17 | 5  | 2.4 | PHIVOLCS |
| 19-Aug-20 | 1:19 AM  | 11.9  | 124.1  | 4  | 2.6 | PHIVOLCS |
| 19-Aug-20 | 1:31 AM  | 12.08 | 124.01 | 22 | 2.3 | PHIVOLCS |
| 19-Aug-20 | 1:37 AM  | 11.94 | 124.02 | 29 | 2.1 | PHIVOLCS |
| 19-Aug-20 | 2:00 AM  | 11.85 | 124.22 | 8  | 3   | PHIVOLCS |
| 19-Aug-20 | 2:28 AM  | 11.84 | 124.14 | 11 | 4   | PHIVOLCS |
| 19-Aug-20 | 2:53 AM  | 11.91 | 124.07 | 3  | 2.8 | PHIVOLCS |
| 19-Aug-20 | 2:59 AM  | 11.92 | 124.08 | 7  | 2.3 | PHIVOLCS |
| 19-Aug-20 | 3:06 AM  | 11.99 | 124.11 | 20 | 2.6 | PHIVOLCS |
| 19-Aug-20 | 3:09 AM  | 11.91 | 124.08 | 1  | 2.4 | PHIVOLCS |
| 19-Aug-20 | 3:11 AM  | 11.93 | 124.07 | 7  | 2.9 | PHIVOLCS |
| 19-Aug-20 | 3:20 AM  | 11.92 | 124.09 | 12 | 2.6 | PHIVOLCS |
| 19-Aug-20 | 3:49 AM  | 11.99 | 124.08 | 22 | 2.9 | PHIVOLCS |
| 19-Aug-20 | 3:53 AM  | 11.96 | 124.11 | 2  | 2.5 | PHIVOLCS |
| 19-Aug-20 | 3:58 AM  | 11.97 | 124.07 | 10 | 2.5 | PHIVOLCS |
| 19-Aug-20 | 4:06 AM  | 12.17 | 123.92 | 26 | 3   | PHIVOLCS |
| 19-Aug-20 | 4:29 AM  | 11.93 | 124.11 | 17 | 3.3 | PHIVOLCS |
| 19-Aug-20 | 4:52 AM  | 11.87 | 124.1  | 7  | 3.3 | PHIVOLCS |
| 19-Aug-20 | 5:11 AM  | 11.95 | 124.05 | 11 | 2.5 | PHIVOLCS |
| 19-Aug-20 | 5:13 AM  | 11.88 | 124.12 | 7  | 3   | PHIVOLCS |
| 19-Aug-20 | 5:31 AM  | 11.95 | 124.05 | 13 | 3.8 | PHIVOLCS |
| 19-Aug-20 | 5:39 AM  | 12.11 | 123.99 | 15 | 3.3 | PHIVOLCS |
| 19-Aug-20 | 5:41 AM  | 11.95 | 124.06 | 1  | 2.3 | PHIVOLCS |
| 19-Aug-20 | 5:50 AM  | 11.86 | 124.07 | 2  | 5.1 | PHIVOLCS |
| 19-Aug-20 | 5:57 AM  | 11.84 | 124.13 | 6  | 4.4 | PHIVOLCS |
| 19-Aug-20 | 6:57 AM  | 11.89 | 124.08 | 1  | 2.8 | PHIVOLCS |
| 19-Aug-20 | 7:06 AM  | 11.96 | 123.99 | 18 | 2.1 | PHIVOLCS |
| 19-Aug-20 | 7:10 AM  | 11.88 | 124.05 | 4  | 2.8 | PHIVOLCS |
| 19-Aug-20 | 7:17 AM  | 11.85 | 124.09 | 14 | 3.6 | PHIVOLCS |
| 19-Aug-20 | 7:20 AM  | 11.87 | 124.06 | 8  | 2.9 | PHIVOLCS |
| 19-Aug-20 | 8:20 AM  | 12.03 | 124.11 | 18 | 2.1 | PHIVOLCS |
| 19-Aug-20 | 8:36 AM  | 11.98 | 124.06 | 21 | 2.8 | PHIVOLCS |
| 19-Aug-20 | 9:23 AM  | 11.96 | 124.05 | 1  | 3.4 | PHIVOLCS |
| 19-Aug-20 | 10:50 AM | 11.84 | 124.11 | 10 | 2.9 | PHIVOLCS |
| 19-Aug-20 | 1:08 PM  | 11.82 | 124.14 | 1  | 2.6 | PHIVOLCS |
| 19-Aug-20 | 3:26 PM  | 12.05 | 124.02 | 22 | 3   | PHIVOLCS |
| 19-Aug-20 | 6:04 PM  | 11.87 | 124.15 | 17 | 3.9 | PHIVOLCS |
| 19-Aug-20 | 6:32 PM  | 12.05 | 123.98 | 30 | 2.2 | PHIVOLCS |
| 19-Aug-20 | 7:26 PM  | 12.07 | 123.99 | 7  | 2.1 | PHIVOLCS |
| 19-Aug-20 | 8:00 PM  | 12.31 | 123.86 | 15 | 2.9 | PHIVOLCS |
| 19-Aug-20 | 10:54 PM | 11.89 | 124.04 | 1  | 3.3 | PHIVOLCS |
| 20-Aug-20 | 12:29 AM | 11.92 | 124.08 | 2  | 3.7 | PHIVOLCS |
| 20-Aug-20 | 2:57 AM  | 11.88 | 124.08 | 1  | 3.4 | PHIVOLCS |
| 20-Aug-20 | 3:28 AM  | 11.8  | 124.18 | 16 | 3.3 | PHIVOLCS |
| 20-Aug-20 | 7:02 AM  | 12.12 | 123.96 | 14 | 2.6 | PHIVOLCS |
| 20-Aug-20 | 8:33 AM  | 12.1  | 123.93 | 1  | 2.7 | PHIVOLCS |
| 20-Aug-20 | 9:45 AM  | 12.01 | 124.03 | 20 | 3   | PHIVOLCS |
| 20-Aug-20 | 10:43 AM | 12.03 | 123.89 | 26 | 2.2 | PHIVOLCS |
| 20-Aug-20 | 12:39 PM | 11.95 | 123.96 | 24 | 2.3 | PHIVOLCS |
| 20-Aug-20 | 3:33 PM  | 11.97 | 124.01 | 17 | 2.8 | PHIVOLCS |
| 20-Aug-20 | 3:52 PM  | 12.46 | 123.2  | 26 | 2.4 | PHIVOLCS |
| 20-Aug-20 | 6:40 PM  | 11.72 | 124.16 | 16 | 3.6 | PHIVOLCS |
| 20-Aug-20 | 7:20 PM  | 12.07 | 123.95 | 1  | 2.6 | PHIVOLCS |
| 20-Aug-20 | 7:45 PM  | 11.87 | 124.1  | 13 | 2   | PHIVOLCS |



|           |          |       |        |    |     |          |
|-----------|----------|-------|--------|----|-----|----------|
| 20-Aug-20 | 8:28 PM  | 11.82 | 124.16 | 1  | 2.4 | PHIVOLCS |
| 20-Aug-20 | 10:07 PM | 11.85 | 124.18 | 1  | 3   | PHIVOLCS |
| 20-Aug-20 | 10:19 PM | 11.82 | 124.18 | 6  | 2.9 | PHIVOLCS |
| 20-Aug-20 | 11:09 PM | 12.13 | 123.98 | 17 | 3.2 | PHIVOLCS |
| 20-Aug-20 | 11:45 PM | 12.01 | 124.02 | 11 | 2   | PHIVOLCS |
| 20-Aug-20 | 11:48 PM | 11.96 | 124.01 | 7  | 2.7 | PHIVOLCS |
| 21-Aug-20 | 12:21 AM | 12.02 | 124    | 1  | 2.2 | PHIVOLCS |
| 21-Aug-20 | 12:30 AM | 12.12 | 123.97 | 18 | 3.4 | PHIVOLCS |
| 21-Aug-20 | 1:20 AM  | 12.13 | 124.03 | 19 | 2.7 | PHIVOLCS |
| 21-Aug-20 | 1:25 AM  | 12.32 | 123.82 | 16 | 4   | PHIVOLCS |
| 21-Aug-20 | 3:15 AM  | 13.09 | 122.59 | 1  | 2.6 | PHIVOLCS |
| 21-Aug-20 | 3:51 AM  | 11.79 | 124.11 | 6  | 2.8 | PHIVOLCS |
| 21-Aug-20 | 3:59 AM  | 11.92 | 124.09 | 1  | 2.7 | PHIVOLCS |
| 21-Aug-20 | 4:21 AM  | 11.8  | 124.24 | 9  | 2.6 | PHIVOLCS |
| 21-Aug-20 | 9:02 AM  | 11.91 | 124.08 | 12 | 3.8 | PHIVOLCS |
| 21-Aug-20 | 9:03 AM  | 12.21 | 124.02 | 14 | 2.6 | PHIVOLCS |
| 21-Aug-20 | 9:11 AM  | 11.97 | 124.05 | 18 | 3   | PHIVOLCS |
| 21-Aug-20 | 9:53 AM  | 12.7  | 123.2  | 8  | 3.1 | PHIVOLCS |
| 21-Aug-20 | 11:54 AM | 11.97 | 123.97 | 19 | 2.2 | PHIVOLCS |
| 21-Aug-20 | 4:01 PM  | 11.94 | 124.06 | 11 | 4.1 | PHIVOLCS |
| 21-Aug-20 | 8:00 PM  | 11.83 | 124.16 | 1  | 3   | PHIVOLCS |
| 21-Aug-20 | 8:36 PM  | 12.12 | 123.86 | 32 | 2.7 | PHIVOLCS |
| 21-Aug-20 | 8:49 PM  | 12.01 | 124.08 | 6  | 3.5 | PHIVOLCS |
| 21-Aug-20 | 9:07 PM  | 11.88 | 124.1  | 7  | 3.7 | PHIVOLCS |
| 21-Aug-20 | 10:20 PM | 12.2  | 123.88 | 29 | 2.6 | PHIVOLCS |
| 21-Aug-20 | 11:25 PM | 11.81 | 124.23 | 1  | 2   | PHIVOLCS |
| 22-Aug-20 | 12:06 AM | 11.99 | 124.13 | 21 | 2.4 | PHIVOLCS |
| 22-Aug-20 | 1:52 AM  | 12.23 | 123.89 | 25 | 2.1 | PHIVOLCS |
| 22-Aug-20 | 1:52 AM  | 12.23 | 123.89 | 25 | 2.1 | PHIVOLCS |
| 22-Aug-20 | 3:27 AM  | 11.83 | 124.24 | 3  | 2.6 | PHIVOLCS |
| 22-Aug-20 | 5:29 AM  | 11.98 | 124.01 | 1  | 2.1 | PHIVOLCS |
| 22-Aug-20 | 7:08 AM  | 12.03 | 124.02 | 11 | 3.2 | PHIVOLCS |
| 22-Aug-20 | 9:22 AM  | 11.83 | 123.97 | 1  | 2.4 | PHIVOLCS |
| 22-Aug-20 | 3:10 PM  | 11.94 | 124.13 | 5  | 2.9 | PHIVOLCS |
| 22-Aug-20 | 5:23 PM  | 12.14 | 123.99 | 18 | 1.9 | PHIVOLCS |
| 22-Aug-20 | 7:12 PM  | 12.13 | 123.99 | 20 | 2.9 | PHIVOLCS |
| 22-Aug-20 | 8:59 PM  | 12    | 124    | 19 | 2.5 | PHIVOLCS |
| 22-Aug-20 | 9:51 PM  | 12.05 | 123.98 | 1  | 3   | PHIVOLCS |
| 22-Aug-20 | 10:06 PM | 12.02 | 124.01 | 15 | 3.6 | PHIVOLCS |
| 22-Aug-20 | 10:10 PM | 12.01 | 124.04 | 9  | 2.5 | PHIVOLCS |
| 22-Aug-20 | 11:10 PM | 12.25 | 123.84 | 20 | 3.1 | PHIVOLCS |
| 22-Aug-20 | 11:40 PM | 11.88 | 124.31 | 15 | 2.1 | PHIVOLCS |
| 22-Aug-20 | 11:45 PM | 12.09 | 124.06 | 21 | 2.7 | PHIVOLCS |
| 22-Aug-20 | 11:52 PM | 12.01 | 124.11 | 15 | 2.1 | PHIVOLCS |
| 23-Aug-20 | 1:07 AM  | 11.87 | 124.11 | 3  | 2.3 | PHIVOLCS |
| 23-Aug-20 | 2:50 AM  | 12.11 | 123.99 | 15 | 2.4 | PHIVOLCS |
| 23-Aug-20 | 3:58 AM  | 12.1  | 123.93 | 24 | 2.4 | PHIVOLCS |
| 23-Aug-20 | 6:28 AM  | 12.39 | 123.74 | 37 | 3.5 | PHIVOLCS |
| 23-Aug-20 | 6:45 AM  | 12.11 | 124.04 | 18 | 2.8 | PHIVOLCS |
| 23-Aug-20 | 7:10 AM  | 11.84 | 124.11 | 2  | 2.8 | PHIVOLCS |
| 23-Aug-20 | 7:25 AM  | 12.12 | 123.9  | 25 | 3.2 | PHIVOLCS |
| 23-Aug-20 | 11:01 AM | 11.84 | 124.18 | 21 | 3.1 | PHIVOLCS |
| 23-Aug-20 | 12:13 PM | 11.89 | 124.19 | 17 | 2.2 | PHIVOLCS |
| 23-Aug-20 | 2:43 PM  | 12.06 | 123.99 | 24 | 3   | PHIVOLCS |
| 23-Aug-20 | 2:47 PM  | 12.13 | 123.99 | 12 | 3   | PHIVOLCS |
| 23-Aug-20 | 3:07 PM  | 11.95 | 124.17 | 22 | 2.5 | PHIVOLCS |

|           |          |       |        |    |     |          |
|-----------|----------|-------|--------|----|-----|----------|
| 23-Aug-20 | 3:08 PM  | 12.09 | 124.03 | 28 | 3.1 | PHIVOLCS |
| 23-Aug-20 | 7:03 PM  | 12.05 | 123.94 | 1  | 2.9 | PHIVOLCS |
| 23-Aug-20 | 7:27 PM  | 11.9  | 124.14 | 1  | 3   | PHIVOLCS |
| 23-Aug-20 | 9:45 PM  | 12.13 | 123.93 | 27 | 2.4 | PHIVOLCS |
| 23-Aug-20 | 10:18 PM | 11.88 | 124.06 | 5  | 3.9 | PHIVOLCS |
| 23-Aug-20 | 10:25 PM | 11.88 | 124.05 | 5  | 3.5 | PHIVOLCS |
| 24-Aug-20 | 1:13 AM  | 11.99 | 123.8  | 40 | 2.4 | PHIVOLCS |
| 24-Aug-20 | 1:39 AM  | 11.9  | 124.1  | 4  | 2.2 | PHIVOLCS |
| 24-Aug-20 | 2:06 AM  | 12.18 | 123.88 | 33 | 2.4 | PHIVOLCS |
| 24-Aug-20 | 2:28 AM  | 11.98 | 124.03 | 1  | 2.8 | PHIVOLCS |
| 24-Aug-20 | 3:14 AM  | 12.06 | 123.91 | 1  | 1.9 | PHIVOLCS |
| 24-Aug-20 | 7:39 AM  | 11.9  | 124.15 | 1  | 2.4 | PHIVOLCS |
| 24-Aug-20 | 11:36 AM | 12.38 | 123.85 | 9  | 2.2 | PHIVOLCS |
| 24-Aug-20 | 11:43 AM | 12.06 | 123.98 | 5  | 2.7 | PHIVOLCS |
| 24-Aug-20 | 1:26 PM  | 12.09 | 124.06 | 9  | 2   | PHIVOLCS |
| 24-Aug-20 | 7:11 PM  | 11.98 | 124.04 | 1  | 3   | PHIVOLCS |
| 24-Aug-20 | 10:01 PM | 11.82 | 124.22 | 2  | 3.1 | PHIVOLCS |
| 25-Aug-20 | 1:34 AM  | 12.23 | 123.89 | 23 | 3   | PHIVOLCS |
| 25-Aug-20 | 1:41 AM  | 12.13 | 123.98 | 38 | 3   | PHIVOLCS |
| 25-Aug-20 | 4:19 AM  | 12.27 | 123.84 | 16 | 3.7 | PHIVOLCS |
| 25-Aug-20 | 10:30 AM | 12    | 124.06 | 2  | 2.8 | PHIVOLCS |
| 25-Aug-20 | 7:46 PM  | 11.78 | 124.17 | 16 | 2.6 | PHIVOLCS |
| 25-Aug-20 | 8:15 PM  | 12.1  | 123.91 | 1  | 3.8 | PHIVOLCS |
| 25-Aug-20 | 8:19 PM  | 12.05 | 124.11 | 14 | 2.6 | PHIVOLCS |
| 26-Aug-20 | 1:30 AM  | 11.91 | 124.08 | 1  | 2.8 | PHIVOLCS |
| 26-Aug-20 | 3:16 AM  | 12.25 | 123.7  | 30 | 2.6 | PHIVOLCS |
| 26-Aug-20 | 3:19 AM  | 12.28 | 123.84 | 16 | 3.5 | PHIVOLCS |
| 26-Aug-20 | 5:08 AM  | 12.47 | 123.67 | 22 | 2.2 | PHIVOLCS |
| 26-Aug-20 | 8:12 AM  | 12.17 | 123.93 | 21 | 3.8 | PHIVOLCS |
| 26-Aug-20 | 1:08 PM  | 12.22 | 123.97 | 12 | 2.6 | PHIVOLCS |
| 26-Aug-20 | 3:03 PM  | 12.01 | 124.02 | 15 | 2.4 | PHIVOLCS |
| 26-Aug-20 | 7:21 PM  | 12.07 | 124.01 | 10 | 3.5 | PHIVOLCS |
| 26-Aug-20 | 7:28 PM  | 12.05 | 123.97 | 1  | 2.9 | PHIVOLCS |
| 26-Aug-20 | 10:32 PM | 11.86 | 124.12 | 7  | 3.3 | PHIVOLCS |
| 27-Aug-20 | 1:54 AM  | 12.1  | 123.98 | 33 | 2.5 | PHIVOLCS |
| 27-Aug-20 | 2:09 AM  | 12.14 | 124    | 13 | 2.6 | PHIVOLCS |
| 27-Aug-20 | 6:35 AM  | 12.12 | 124.01 | 15 | 2.6 | PHIVOLCS |
| 27-Aug-20 | 11:59 AM | 12.12 | 123.92 | 22 | 2.2 | PHIVOLCS |
| 27-Aug-20 | 9:38 PM  | 11.86 | 124.19 | 1  | 2.1 | PHIVOLCS |
| 27-Aug-20 | 11:15 PM | 11.82 | 124.17 | 17 | 3.8 | PHIVOLCS |
| 27-Aug-20 | 11:23 PM | 11.85 | 124.19 | 1  | 2.1 | PHIVOLCS |
| 28-Aug-20 | 4:30 AM  | 11.91 | 124.12 | 1  | 2.5 | PHIVOLCS |
| 28-Aug-20 | 4:49 AM  | 12.02 | 124.01 | 19 | 2.8 | PHIVOLCS |
| 28-Aug-20 | 8:01 PM  | 12.01 | 124.08 | 17 | 2.5 | PHIVOLCS |
| 28-Aug-20 | 8:15 PM  | 12.18 | 123.85 | 29 | 2.3 | PHIVOLCS |
| 29-Aug-20 | 4:56 AM  | 12.15 | 123.79 | 33 | 2.2 | PHIVOLCS |
| 29-Aug-20 | 6:12 PM  | 12.16 | 123.92 | 8  | 2.5 | PHIVOLCS |
| 29-Aug-20 | 7:35 PM  | 12.09 | 124.02 | 10 | 2.5 | PHIVOLCS |
| 30-Aug-20 | 12:04 AM | 11.93 | 124.07 | 18 | 3.5 | PHIVOLCS |
| 31-Aug-20 | 10:23 AM | 12.17 | 123.98 | 19 | 2.4 | PHIVOLCS |
| 31-Aug-20 | 7:44 PM  | 12.29 | 123.85 | 21 | 2.4 | PHIVOLCS |
| 1-Sep-20  | 9:44 AM  | 12.07 | 123.96 | 27 | 3.2 | PHIVOLCS |
| 1-Sep-20  | 12:22 PM | 11.95 | 124.01 | 4  | 4.1 | PHIVOLCS |
| 1-Sep-20  | 7:04 PM  | 12.2  | 123.71 | 1  | 2.6 | PHIVOLCS |
| 2-Sep-20  | 9:54 AM  | 12.52 | 123.82 | 19 | 2.1 | PHIVOLCS |
| 2-Sep-20  | 10:53 AM | 12.08 | 123.9  | 1  | 2.4 | PHIVOLCS |

|           |          |       |        |    |     |          |
|-----------|----------|-------|--------|----|-----|----------|
| 2-Sep-20  | 4:39 PM  | 12.18 | 123.99 | 17 | 2.2 | PHIVOLCS |
| 2-Sep-20  | 9:25 PM  | 11.88 | 124.12 | 17 | 2.8 | PHIVOLCS |
| 2-Sep-20  | 9:47 PM  | 12.06 | 124.05 | 2  | 2   | PHIVOLCS |
| 3-Sep-20  | 7:41 AM  | 11.83 | 124.08 | 2  | 3.1 | PHIVOLCS |
| 3-Sep-20  | 8:35 PM  | 12.16 | 123.96 | 10 | 2.8 | PHIVOLCS |
| 3-Sep-20  | 11:16 PM | 12.05 | 124.05 | 24 | 2.7 | PHIVOLCS |
| 4-Sep-20  | 7:19 PM  | 11.9  | 124.04 | 8  | 2.2 | PHIVOLCS |
| 5-Sep-20  | 12:09 PM | 11.72 | 124.24 | 10 | 2.9 | PHIVOLCS |
| 5-Sep-20  | 8:20 PM  | 12.04 | 124.07 | 24 | 2.2 | PHIVOLCS |
| 5-Sep-20  | 8:39 PM  | 11.98 | 124.06 | 2  | 2.5 | PHIVOLCS |
| 5-Sep-20  | 9:15 PM  | 11.98 | 124.07 | 1  | 2.2 | PHIVOLCS |
| 6-Sep-20  | 7:45 AM  | 12.44 | 123.86 | 93 | 2.2 | PHIVOLCS |
| 6-Sep-20  | 8:40 AM  | 11.86 | 124.12 | 1  | 3.2 | PHIVOLCS |
| 6-Sep-20  | 4:42 PM  | 12.27 | 123.88 | 14 | 2.4 | PHIVOLCS |
| 7-Sep-20  | 3:48 AM  | 12.11 | 124    | 11 | 2.8 | PHIVOLCS |
| 7-Sep-20  | 11:44 AM | 11.97 | 124.04 | 1  | 3.1 | PHIVOLCS |
| 7-Sep-20  | 11:55 AM | 12.46 | 123.75 | 24 | 2.8 | PHIVOLCS |
| 8-Sep-20  | 12:28 AM | 11.85 | 124.01 | 25 | 2.6 | PHIVOLCS |
| 8-Sep-20  | 9:54 AM  | 12.18 | 123.95 | 23 | 2.5 | PHIVOLCS |
| 8-Sep-20  | 9:56 AM  | 12.09 | 124.04 | 12 | 2.7 | PHIVOLCS |
| 8-Sep-20  | 11:19 AM | 12.07 | 124.01 | 1  | 2.4 | PHIVOLCS |
| 8-Sep-20  | 12:04 PM | 11.97 | 124.06 | 5  | 3.4 | PHIVOLCS |
| 8-Sep-20  | 1:14 PM  | 12.29 | 123.96 | 66 | 2.6 | PHIVOLCS |
| 8-Sep-20  | 2:23 PM  | 12.05 | 124.05 | 18 | 2.7 | PHIVOLCS |
| 8-Sep-20  | 6:02 PM  | 12.09 | 124.01 | 16 | 3.4 | PHIVOLCS |
| 8-Sep-20  | 6:41 PM  | 11.94 | 124.12 | 18 | 2.6 | PHIVOLCS |
| 8-Sep-20  | 6:43 PM  | 11.97 | 124.11 | 12 | 3.1 | PHIVOLCS |
| 8-Sep-20  | 7:35 PM  | 12.09 | 123.97 | 1  | 1.9 | PHIVOLCS |
| 8-Sep-20  | 7:43 PM  | 12.07 | 124.06 | 15 | 2.6 | PHIVOLCS |
| 8-Sep-20  | 9:45 PM  | 12.13 | 123.9  | 1  | 2.5 | PHIVOLCS |
| 9-Sep-20  | 2:02 AM  | 12.2  | 123.81 | 76 | 2.6 | PHIVOLCS |
| 9-Sep-20  | 5:31 AM  | 12.15 | 123.98 | 20 | 2   | PHIVOLCS |
| 10-Sep-20 | 3:33 AM  | 12.14 | 123.88 | 70 | 2.8 | PHIVOLCS |
| 10-Sep-20 | 5:05 AM  | 12.03 | 123.78 | 1  | 2   | PHIVOLCS |
| 10-Sep-20 | 8:27 AM  | 11.9  | 124.08 | 4  | 3.9 | PHIVOLCS |
| 10-Sep-20 | 1:32 PM  | 11.86 | 124.1  | 21 | 2.2 | PHIVOLCS |
| 10-Sep-20 | 11:50 PM | 12.16 | 123.81 | 1  | 2.6 | PHIVOLCS |
| 11-Sep-20 | 3:17 AM  | 12.1  | 123.87 | 19 | 2.6 | PHIVOLCS |
| 11-Sep-20 | 6:46 PM  | 11.76 | 124.31 | 23 | 2.8 | PHIVOLCS |
| 11-Sep-20 | 6:46 PM  | 11.75 | 124.27 | 13 | 2.1 | PHIVOLCS |
| 12-Sep-20 | 12:16 AM | 11.88 | 124.05 | 3  | 3.1 | PHIVOLCS |
| 12-Sep-20 | 7:27 AM  | 12.2  | 123.91 | 8  | 3.6 | PHIVOLCS |
| 13-Sep-20 | 12:36 AM | 12.03 | 124.01 | 2  | 2.6 | PHIVOLCS |
| 13-Sep-20 | 12:55 AM | 12.17 | 123.88 | 30 | 2.5 | PHIVOLCS |
| 13-Sep-20 | 12:44 PM | 12.03 | 124.01 | 20 | 3.3 | PHIVOLCS |
| 13-Sep-20 | 3:08 PM  | 11.96 | 124.03 | 1  | 3.1 | PHIVOLCS |
| 13-Sep-20 | 10:07 PM | 11.9  | 124.12 | 3  | 3   | PHIVOLCS |
| 14-Sep-20 | 11:09 AM | 12.14 | 124.01 | 15 | 2.4 | PHIVOLCS |
| 15-Sep-20 | 4:41 AM  | 11.86 | 124.17 | 5  | 3.6 | PHIVOLCS |
| 15-Sep-20 | 4:53 AM  | 11.84 | 124.15 | 6  | 2.5 | PHIVOLCS |
| 15-Sep-20 | 5:27 AM  | 12.22 | 124.01 | 64 | 2.3 | PHIVOLCS |
| 16-Sep-20 | 2:43 AM  | 12.1  | 123.95 | 25 | 2.5 | PHIVOLCS |
| 16-Sep-20 | 1:23 PM  | 12.27 | 123.83 | 21 | 3.1 | PHIVOLCS |
| 16-Sep-20 | 5:40 PM  | 11.76 | 124.19 | 7  | 2.4 | PHIVOLCS |
| 17-Sep-20 | 5:54 PM  | 11.9  | 124.17 | 1  | 2.6 | PHIVOLCS |
| 18-Sep-20 | 5:02 AM  | 12.47 | 123.66 | 33 | 2.1 | PHIVOLCS |

|           |          |       |        |    |     |          |
|-----------|----------|-------|--------|----|-----|----------|
| 18-Sep-20 | 3:14 PM  | 11.92 | 124.13 | 6  | 2.2 | PHIVOLCS |
| 20-Sep-20 | 1:49 AM  | 12.85 | 123.38 | 15 | 3.8 | PHIVOLCS |
| 20-Sep-20 | 2:06 AM  | 12.86 | 123.39 | 27 | 3.5 | PHIVOLCS |
| 20-Sep-20 | 11:12 AM | 12.7  | 123.18 | 5  | 3.7 | PHIVOLCS |
| 20-Sep-20 | 11:50 AM | 12.77 | 123.3  | 14 | 3.8 | PHIVOLCS |
| 20-Sep-20 | 6:51 PM  | 11.86 | 124.24 | 5  | 2.1 | PHIVOLCS |
| 22-Sep-20 | 9:41 PM  | 12.29 | 123.95 | 20 | 1.7 | PHIVOLCS |
| 23-Sep-20 | 12:38 AM | 11.81 | 124.14 | 7  | 4.1 | PHIVOLCS |
| 23-Sep-20 | 3:57 AM  | 11.84 | 124.12 | 1  | 3   | PHIVOLCS |
| 23-Sep-20 | 6:26 AM  | 12.09 | 124.01 | 5  | 2.6 | PHIVOLCS |
| 23-Sep-20 | 12:05 PM | 12.16 | 123.91 | 11 | 4.5 | PHIVOLCS |
| 23-Sep-20 | 12:09 PM | 12.08 | 123.93 | 1  | 3   | PHIVOLCS |
| 23-Sep-20 | 12:11 PM | 12.24 | 123.75 | 31 | 2.3 | PHIVOLCS |
| 23-Sep-20 | 10:07 PM | 12.29 | 123.87 | 21 | 2.9 | PHIVOLCS |
| 24-Sep-20 | 12:52 AM | 11.92 | 124.06 | 3  | 2.7 | PHIVOLCS |
| 24-Sep-20 | 3:28 AM  | 11.87 | 124.17 | 2  | 2.1 | PHIVOLCS |
| 24-Sep-20 | 4:51 AM  | 11.83 | 124.19 | 1  | 1.9 | PHIVOLCS |
| 24-Sep-20 | 6:00 AM  | 11.85 | 124.09 | 15 | 2.1 | PHIVOLCS |
| 24-Sep-20 | 6:00 AM  | 11.9  | 124.12 | 21 | 2.2 | PHIVOLCS |
| 24-Sep-20 | 6:01 AM  | 11.82 | 124.22 | 3  | 2.7 | PHIVOLCS |
| 25-Sep-20 | 3:21 AM  | 12.22 | 123.78 | 32 | 2   | PHIVOLCS |
| 25-Sep-20 | 5:36 PM  | 12.29 | 123.76 | 31 | 2.8 | PHIVOLCS |
| 26-Sep-20 | 3:17 AM  | 12.17 | 123.92 | 21 | 2.6 | PHIVOLCS |
| 27-Sep-20 | 5:53 PM  | 12.57 | 123.55 | 4  | 3.3 | PHIVOLCS |
| 27-Sep-20 | 11:26 PM | 12.5  | 123.55 | 8  | 2.9 | PHIVOLCS |
| 28-Sep-20 | 3:13 AM  | 12.35 | 123.82 | 14 | 2.9 | PHIVOLCS |
| 28-Sep-20 | 5:23 AM  | 12.59 | 123.53 | 33 | 2.3 | PHIVOLCS |
| 28-Sep-20 | 10:31 AM | 11.75 | 124.27 | 3  | 3.1 | PHIVOLCS |
| 28-Sep-20 | 12:34 PM | 12.31 | 123.72 | 31 | 2.9 | PHIVOLCS |
| 28-Sep-20 | 9:52 PM  | 12.31 | 123.79 | 28 | 2.7 | PHIVOLCS |
| 29-Sep-20 | 3:18 AM  | 11.98 | 124.08 | 7  | 2.8 | PHIVOLCS |
| 30-Sep-20 | 5:39 AM  | 11.85 | 124.12 | 1  | 1.9 | PHIVOLCS |
| 2-Oct-20  | 3:58 PM  | 11.81 | 124.13 | 1  | 2.4 | PHIVOLCS |
| 2-Oct-20  | 5:57 PM  | 12.17 | 124.02 | 15 | 2.2 | PHIVOLCS |
| 2-Oct-20  | 9:54 PM  | 12.34 | 123.85 | 24 | 3.2 | PHIVOLCS |
| 3-Oct-20  | 2:43 AM  | 11.83 | 124.28 | 11 | 2.9 | PHIVOLCS |
| 3-Oct-20  | 4:57 AM  | 11.84 | 124.16 | 11 | 2.4 | PHIVOLCS |
| 3-Oct-20  | 7:12 AM  | 12.57 | 123.51 | 6  | 3.2 | PHIVOLCS |
| 3-Oct-20  | 9:29 AM  | 12.22 | 123.91 | 19 | 3.3 | PHIVOLCS |
| 4-Oct-20  | 9:04 AM  | 11.79 | 124.28 | 19 | 2.4 | PHIVOLCS |
| 5-Oct-20  | 3:58 AM  | 12.3  | 123.78 | 40 | 2.8 | PHIVOLCS |
| 6-Oct-20  | 2:34 AM  | 12.53 | 123.71 | 11 | 2.4 | PHIVOLCS |
| 8-Oct-20  | 7:00 PM  | 11.94 | 124.15 | 4  | 3.4 | PHIVOLCS |
| 9-Oct-20  | 2:49 PM  | 11.91 | 124.01 | 23 | 2.2 | PHIVOLCS |
| 9-Oct-20  | 5:31 PM  | 13.05 | 122.62 | 3  | 2.1 | PHIVOLCS |
| 9-Oct-20  | 8:36 PM  | 12.09 | 123.94 | 1  | 2.8 | PHIVOLCS |
| 10-Oct-20 | 8:27 PM  | 11.8  | 124.17 | 11 | 3.4 | PHIVOLCS |
| 11-Oct-20 | 6:01 AM  | 12.05 | 123.96 | 4  | 3   | PHIVOLCS |
| 11-Oct-20 | 2:01 PM  | 12.08 | 123.98 | 4  | 2.8 | PHIVOLCS |
| 12-Oct-20 | 12:58 AM | 12.35 | 123.76 | 11 | 2.9 | PHIVOLCS |
| 12-Oct-20 | 10:40 PM | 11.89 | 124.11 | 2  | 2.9 | PHIVOLCS |
| 13-Oct-20 | 12:56 AM | 11.83 | 124.21 | 1  | 2.4 | PHIVOLCS |
| 14-Oct-20 | 1:43 AM  | 12.43 | 123.72 | 27 | 2.8 | PHIVOLCS |
| 14-Oct-20 | 6:46 PM  | 11.85 | 124.14 | 11 | 2.8 | PHIVOLCS |
| 15-Oct-20 | 9:23 PM  | 12.35 | 123.83 | 29 | 2.5 | PHIVOLCS |
| 19-Oct-20 | 1:19 AM  | 12.5  | 123.65 | 64 | 2.4 | PHIVOLCS |

|           |          |       |        |    |     |          |
|-----------|----------|-------|--------|----|-----|----------|
| 19-Oct-20 | 6:23 AM  | 12.15 | 123.95 | 28 | 2.8 | PHIVOLCS |
| 19-Oct-20 | 8:09 PM  | 12.8  | 123.49 | 13 | 2.9 | PHIVOLCS |
| 21-Oct-20 | 1:23 AM  | 11.74 | 124.1  | 32 | 2.6 | PHIVOLCS |
| 21-Oct-20 | 12:17 PM | 11.86 | 124.21 | 1  | 2.2 | PHIVOLCS |
| 23-Oct-20 | 2:31 AM  | 13.14 | 123.14 | 18 | 2.1 | PHIVOLCS |
| 24-Oct-20 | 2:07 AM  | 13.03 | 122.79 | 20 | 2.5 | PHIVOLCS |
| 24-Oct-20 | 6:34 AM  | 11.86 | 124.11 | 11 | 2.8 | PHIVOLCS |
| 25-Oct-20 | 3:53 PM  | 11.94 | 124.22 | 15 | 2.9 | PHIVOLCS |
| 26-Oct-20 | 6:11 PM  | 12.01 | 124.1  | 1  | 2.8 | PHIVOLCS |
| 26-Oct-20 | 11:49 PM | 11.85 | 124.15 | 7  | 2   | PHIVOLCS |
| 28-Oct-20 | 2:21 AM  | 12.16 | 123.93 | 6  | 3.6 | PHIVOLCS |
| 28-Oct-20 | 7:57 AM  | 11.91 | 124.07 | 1  | 3.9 | PHIVOLCS |
| 28-Oct-20 | 9:47 PM  | 12.08 | 123.98 | 12 | 2.7 | PHIVOLCS |
| 30-Oct-20 | 8:43 AM  | 11.88 | 124.08 | 13 | 3.8 | PHIVOLCS |
| 31-Oct-20 | 5:26 AM  | 12.31 | 123.86 | 18 | 2.7 | PHIVOLCS |
| 2-Nov-20  | 2:01 PM  | 12.23 | 123.73 | 30 | 2   | PHIVOLCS |
| 2-Nov-20  | 10:06 PM | 11.92 | 124.14 | 20 | 2.4 | PHIVOLCS |
| 5-Nov-20  | 1:53 AM  | 11.83 | 124.16 | 18 | 2.5 | PHIVOLCS |
| 5-Nov-20  | 6:12 AM  | 12.18 | 123.89 | 52 | 2.9 | PHIVOLCS |
| 5-Nov-20  | 9:06 AM  | 11.77 | 124.09 | 24 | 2.2 | PHIVOLCS |
| 6-Nov-20  | 4:40 AM  | 11.85 | 124.07 | 29 | 2.3 | PHIVOLCS |
| 6-Nov-20  | 6:20 AM  | 11.83 | 124.12 | 1  | 2.9 | PHIVOLCS |
| 8-Nov-20  | 12:34 AM | 12.08 | 123.96 | 8  | 2.7 | PHIVOLCS |
| 8-Nov-20  | 10:17 AM | 11.99 | 123.98 | 3  | 3.7 | PHIVOLCS |
| 10-Nov-20 | 8:04 AM  | 11.75 | 124.15 | 1  | 3.2 | PHIVOLCS |
| 13-Nov-20 | 8:10 AM  | 12.18 | 123.94 | 13 | 4   | PHIVOLCS |
| 13-Nov-20 | 8:17 AM  | 12.24 | 123.9  | 22 | 3   | PHIVOLCS |
| 13-Nov-20 | 2:16 PM  | 11.93 | 123.88 | 25 | 2.3 | PHIVOLCS |
| 13-Nov-20 | 6:22 PM  | 12.31 | 123.74 | 47 | 2.4 | PHIVOLCS |
| 13-Nov-20 | 11:32 PM | 11.82 | 124.15 | 1  | 3.4 | PHIVOLCS |
| 15-Nov-20 | 12:13 AM | 12.5  | 123.44 | 12 | 3.8 | PHIVOLCS |
| 15-Nov-20 | 2:35 PM  | 11.81 | 124.16 | 10 | 5   | PHIVOLCS |
| 15-Nov-20 | 5:40 PM  | 11.84 | 124.16 | 19 | 2.2 | PHIVOLCS |
| 15-Nov-20 | 9:54 PM  | 12    | 124.11 | 33 | 2.4 | PHIVOLCS |
| 16-Nov-20 | 2:16 AM  | 11.87 | 124.17 | 6  | 2.6 | PHIVOLCS |
| 16-Nov-20 | 3:22 AM  | 11.83 | 124.13 | 4  | 2.7 | PHIVOLCS |
| 16-Nov-20 | 8:34 AM  | 11.89 | 124.22 | 15 | 3.5 | PHIVOLCS |
| 16-Nov-20 | 1:38 PM  | 11.83 | 124.21 | 2  | 2.7 | PHIVOLCS |
| 18-Nov-20 | 1:39 PM  | 12.49 | 123.69 | 25 | 2.4 | PHIVOLCS |
| 18-Nov-20 | 6:46 PM  | 12.14 | 123.95 | 22 | 2.7 | PHIVOLCS |
| 18-Nov-20 | 9:39 PM  | 12.45 | 123.73 | 15 | 3.5 | PHIVOLCS |
| 19-Nov-20 | 3:56 AM  | 12.27 | 123.77 | 13 | 4.4 | PHIVOLCS |
| 19-Nov-20 | 5:15 AM  | 12.42 | 123.71 | 21 | 3.1 | PHIVOLCS |
| 19-Nov-20 | 8:32 AM  | 12.38 | 123.67 | 28 | 2.9 | PHIVOLCS |
| 19-Nov-20 | 12:12 PM | 12.31 | 123.76 | 16 | 3.3 | PHIVOLCS |
| 20-Nov-20 | 8:19 PM  | 11.85 | 124.15 | 9  | 3.2 | PHIVOLCS |
| 20-Nov-20 | 8:59 PM  | 12.03 | 124.03 | 2  | 2.4 | PHIVOLCS |
| 20-Nov-20 | 11:47 PM | 12.29 | 123.76 | 8  | 2.3 | PHIVOLCS |
| 21-Nov-20 | 10:52 PM | 11.99 | 124.13 | 16 | 2.4 | PHIVOLCS |
| 26-Nov-20 | 2:48 AM  | 11.74 | 124.22 | 12 | 2.8 | PHIVOLCS |
| 26-Nov-20 | 3:09 AM  | 11.73 | 124.26 | 7  | 2.6 | PHIVOLCS |
| 26-Nov-20 | 10:07 PM | 12.09 | 123.93 | 29 | 2.5 | PHIVOLCS |
| 27-Nov-20 | 6:16 AM  | 12.4  | 123.83 | 56 | 2.5 | PHIVOLCS |
| 29-Nov-20 | 9:30 PM  | 13.07 | 122.76 | 7  | 3.2 | PHIVOLCS |
| 30-Nov-20 | 4:23 AM  | 11.9  | 124.11 | 12 | 4.8 | PHIVOLCS |
| 30-Nov-20 | 7:29 AM  | 11.89 | 124.1  | 1  | 2.2 | PHIVOLCS |

|           |          |       |        |    |     |          |
|-----------|----------|-------|--------|----|-----|----------|
| 1-Dec-20  | 2:46 AM  | 11.91 | 124.08 | 1  | 2.4 | PHIVOLCS |
| 4-Dec-20  | 12:52 AM | 12.27 | 123.82 | 20 | 2.8 | PHIVOLCS |
| 4-Dec-20  | 4:08 PM  | 11.89 | 124.14 | 6  | 2.4 | PHIVOLCS |
| 4-Dec-20  | 4:30 PM  | 11.89 | 124.14 | 8  | 2.3 | PHIVOLCS |
| 5-Dec-20  | 12:41 AM | 11.84 | 124.17 | 10 | 2.7 | PHIVOLCS |
| 7-Dec-20  | 2:26 AM  | 12.13 | 123.95 | 19 | 2.5 | PHIVOLCS |
| 8-Dec-20  | 9:22 PM  | 11.75 | 124.25 | 13 | 3.3 | PHIVOLCS |
| 9-Dec-20  | 6:15 PM  | 11.91 | 124.05 | 23 | 2.7 | PHIVOLCS |
| 11-Dec-20 | 12:19 AM | 11.9  | 124.11 | 8  | 3.3 | PHIVOLCS |
| 13-Dec-20 | 10:15 AM | 11.98 | 123.94 | 28 | 2   | PHIVOLCS |
| 13-Dec-20 | 2:45 PM  | 11.94 | 124.06 | 1  | 3.8 | PHIVOLCS |
| 14-Dec-20 | 3:20 AM  | 11.98 | 124.07 | 10 | 3   | PHIVOLCS |
| 14-Dec-20 | 10:14 PM | 12.25 | 123.83 | 6  | 2.6 | PHIVOLCS |
| 22-Dec-20 | 5:18 AM  | 11.83 | 124.24 | 2  | 2.3 | PHIVOLCS |
| 22-Dec-20 | 6:04 AM  | 12.28 | 123.81 | 13 | 3.6 | PHIVOLCS |
| 23-Dec-20 | 4:24 AM  | 12.25 | 123.85 | 28 | 2.4 | PHIVOLCS |
| 23-Dec-20 | 5:36 PM  | 12.62 | 123.48 | 1  | 3   | PHIVOLCS |
| 25-Dec-20 | 11:45 AM | 12.45 | 123.76 | 28 | 2.9 | PHIVOLCS |
| 25-Dec-20 | 10:58 PM | 12.45 | 123.87 | 17 | 2.3 | PHIVOLCS |
| 26-Dec-20 | 4:37 AM  | 12.01 | 124.02 | 15 | 3.5 | PHIVOLCS |
| 27-Dec-20 | 4:01 AM  | 12.85 | 122.82 | 20 | 3.4 | PHIVOLCS |
| 27-Dec-20 | 9:55 PM  | 12.27 | 123.87 | 25 | 3.2 | PHIVOLCS |
| 28-Dec-20 | 5:04 PM  | 11.81 | 124.22 | 1  | 2.4 | PHIVOLCS |
| 28-Dec-20 | 11:56 PM | 12.26 | 123.9  | 22 | 2.6 | PHIVOLCS |
| 29-Dec-20 | 2:16 PM  | 11.87 | 124.15 | 8  | 2.1 | PHIVOLCS |
| 4-Jan-21  | 10:57 AM | 12.11 | 123.96 | 2  | 3.5 | PHIVOLCS |
| 15-Jan-21 | 3:20 AM  | 12.09 | 123.99 | 6  | 3.4 | PHIVOLCS |
| 17-Jan-21 | 11:05 AM | 12.45 | 123.8  | 5  | 3.3 | PHIVOLCS |
| 20-Jan-21 | 8:19 PM  | 12.34 | 123.92 | 42 | 3.1 | PHIVOLCS |
| 29-Jan-21 | 4:42 PM  | 12.33 | 123.76 | 12 | 3.6 | PHIVOLCS |
| 31-Jan-21 | 8:48 AM  | 11.95 | 124.06 | 1  | 3   | PHIVOLCS |
| 9-Feb-21  | 12:24 PM | 12.41 | 123.81 | 26 | 2.3 | PHIVOLCS |
| 11-Feb-21 | 5:52 PM  | 11.78 | 124.13 | 6  | 2.7 | PHIVOLCS |
| 14-Feb-21 | 5:06 PM  | 12.07 | 124.21 | 1  | 3.1 | PHIVOLCS |
| 16-Feb-21 | 4:40 AM  | 12.27 | 123.81 | 3  | 2.9 | PHIVOLCS |
| 19-Feb-21 | 8:54 PM  | 11.91 | 124.08 | 1  | 2.8 | PHIVOLCS |
| 20-Feb-21 | 4:00 PM  | 11.86 | 124.15 | 7  | 2.8 | PHIVOLCS |
| 20-Feb-21 | 9:48 PM  | 12.48 | 123.65 | 3  | 2.8 | PHIVOLCS |
| 21-Feb-21 | 1:31 AM  | 11.85 | 124.27 | 15 | 2.3 | PHIVOLCS |
| 23-Feb-21 | 11:28 PM | 12.07 | 123.94 | 1  | 2.9 | PHIVOLCS |
| 2-Mar-21  | 5:56 PM  | 12.08 | 123.9  | 1  | 2.9 | PHIVOLCS |
| 3-Mar-21  | 10:23 PM | 11.88 | 124.16 | 1  | 2.7 | PHIVOLCS |
| 5-Mar-21  | 4:59 PM  | 12.38 | 123.52 | 5  | 2.8 | PHIVOLCS |
| 6-Mar-21  | 6:57 AM  | 12.34 | 123.67 | 1  | 2.5 | PHIVOLCS |
| 7-Mar-21  | 9:30 AM  | 11.78 | 124.22 | 1  | 2.3 | PHIVOLCS |
| 7-Mar-21  | 5:30 PM  | 12.16 | 124.04 | 15 | 2.5 | PHIVOLCS |
| 19-Mar-21 | 7:40 PM  | 12.56 | 123.6  | 9  | 3.6 | PHIVOLCS |
| 22-Mar-21 | 3:48 AM  | 11.91 | 124.18 | 1  | 2   | PHIVOLCS |
| 30-Mar-21 | 10:02 PM | 12.72 | 123.66 | 8  | 3.7 | PHIVOLCS |
| 31-Mar-21 | 9:20 PM  | 12.36 | 123.71 | 2  | 2.7 | PHIVOLCS |
| 31-Mar-21 | 9:42 PM  | 12.48 | 123.69 | 8  | 2.8 | PHIVOLCS |
| 3-Apr-21  | 10:01 AM | 12.26 | 123.84 | 10 | 3.6 | PHIVOLCS |
| 3-Apr-21  | 10:13 AM | 12.2  | 123.9  | 1  | 3   | PHIVOLCS |
| 4-Apr-21  | 6:47 AM  | 12.98 | 122.86 | 21 | 2.4 | PHIVOLCS |
| 5-Apr-21  | 1:01 AM  | 12.9  | 122.94 | 17 | 4   | PHIVOLCS |
| 5-Apr-21  | 7:11 AM  | 12.53 | 123.62 | 3  | 2.9 | PHIVOLCS |

|           |          |       |        |    |     |          |
|-----------|----------|-------|--------|----|-----|----------|
| 14-Apr-21 | 6:34 PM  | 11.79 | 124.16 | 23 | 2.4 | PHIVOLCS |
| 15-Apr-21 | 2:14 PM  | 11.87 | 124.19 | 10 | 2.5 | PHIVOLCS |
| 29-Apr-21 | 3:26 AM  | 11.72 | 124.16 | 9  | 2.7 | PHIVOLCS |
| 2-May-21  | 3:41 AM  | 11.78 | 124.13 | 9  | 2.3 | PHIVOLCS |
| 2-May-21  | 10:07 PM | 12.16 | 124.1  | 15 | 2.6 | PHIVOLCS |
| 4-May-21  | 1:04 AM  | 11.9  | 124.11 | 1  | 2.5 | PHIVOLCS |
| 5-May-21  | 10:45 PM | 12.2  | 123.9  | 1  | 3.6 | PHIVOLCS |
| 7-May-21  | 4:35 AM  | 12.31 | 123.77 | 18 | 2.5 | PHIVOLCS |
| 9-May-21  | 12:42 AM | 11.8  | 124.13 | 6  | 2.1 | PHIVOLCS |
| 17-May-21 | 4:10 AM  | 12.97 | 122.53 | 3  | 2.2 | PHIVOLCS |
| 18-May-21 | 11:31 PM | 12.33 | 123.72 | 12 | 2.8 | PHIVOLCS |
| 22-May-21 | 10:40 PM | 13.21 | 122.89 | 17 | 2.8 | PHIVOLCS |
| 30-May-21 | 10:38 AM | 12.69 | 123.17 | 23 | 3.7 | PHIVOLCS |
| 31-May-21 | 1:52 AM  | 12.73 | 123.32 | 17 | 2.9 | PHIVOLCS |
| 6-Jun-21  | 8:18 PM  | 12.61 | 123.43 | 14 | 2.7 | PHIVOLCS |
| 8-Jun-21  | 2:17 AM  | 11.9  | 124.06 | 17 | 4.1 | PHIVOLCS |
| 10-Jun-21 | 12:40 AM | 11.81 | 124.2  | 2  | 1.9 | PHIVOLCS |
| 13-Jun-21 | 1:34 AM  | 12.06 | 124.04 | 1  | 1.8 | PHIVOLCS |
| 13-Jun-21 | 8:03 PM  | 11.88 | 124.12 | 3  | 2.5 | PHIVOLCS |
| 16-Jun-21 | 2:24 AM  | 12.72 | 123.29 | 13 | 2.4 | PHIVOLCS |
| 17-Jun-21 | 7:21 AM  | 12.23 | 123.85 | 23 | 3.1 | PHIVOLCS |
| 21-Jun-21 | 12:07 PM | 12.31 | 123.79 | 38 | 3   | PHIVOLCS |
| 29-Jun-21 | 7:30 PM  | 12.36 | 123.72 | 34 | 2.5 | PHIVOLCS |
| 30-Jun-21 | 8:50 AM  | 12.58 | 123.62 | 1  | 2.7 | PHIVOLCS |
| 2-Jul-21  | 11:01 PM | 12.05 | 124.01 | 1  | 2.7 | PHIVOLCS |
| 5-Jul-21  | 11:45 PM | 11.91 | 123.92 | 20 | 1.8 | PHIVOLCS |
| 11-Jul-21 | 4:29 AM  | 12.72 | 123.12 | 17 | 3.8 | PHIVOLCS |
| 11-Jul-21 | 12:43 PM | 11.91 | 124.02 | 12 | 3   | PHIVOLCS |
| 14-Jul-21 | 3:29 AM  | 11.83 | 124.16 | 11 | 3   | PHIVOLCS |
| 15-Jul-21 | 3:10 AM  | 12.54 | 123.59 | 23 | 2.2 | PHIVOLCS |
| 17-Jul-21 | 5:44 AM  | 12.28 | 123.76 | 40 | 2.5 | PHIVOLCS |
| 17-Jul-21 | 10:38 PM | 11.99 | 124.04 | 28 | 3   | PHIVOLCS |
| 21-Jul-21 | 3:38 AM  | 12.04 | 123.98 | 1  | 2.3 | PHIVOLCS |
| 30-Jul-21 | 9:39 PM  | 11.88 | 124.1  | 5  | 2.4 | PHIVOLCS |
| 1-Aug-21  | 6:21 AM  | 11.86 | 124.17 | 3  | 2   | PHIVOLCS |
| 1-Aug-21  | 3:34 PM  | 12.18 | 123.79 | 34 | 2.2 | PHIVOLCS |
| 10-Aug-21 | 2:59 AM  | 12.69 | 123.22 | 1  | 1.9 | PHIVOLCS |
| 12-Aug-21 | 4:53 AM  | 11.74 | 124.25 | 9  | 2.5 | PHIVOLCS |
| 13-Aug-21 | 2:24 AM  | 11.75 | 124.28 | 6  | 2.5 | PHIVOLCS |
| 18-Aug-21 | 6:05 AM  | 12.35 | 123.8  | 10 | 3.1 | PHIVOLCS |
| 19-Aug-21 | 6:08 PM  | 12.34 | 123.76 | 28 | 2.5 | PHIVOLCS |
| 23-Aug-21 | 12:10 PM | 12.54 | 123.61 | 16 | 2.7 | PHIVOLCS |
| 26-Aug-21 | 10:36 PM | 11.76 | 124.24 | 6  | 3.6 | PHIVOLCS |
| 27-Aug-21 | 12:30 AM | 11.77 | 124.24 | 8  | 2.5 | PHIVOLCS |
| 1-Sep-21  | 5:35 AM  | 11.77 | 124.25 | 5  | 3.7 | PHIVOLCS |
| 11-Sep-21 | 1:05 PM  | 12.2  | 123.87 | 23 | 2.6 | PHIVOLCS |
| 13-Sep-21 | 6:48 PM  | 12.56 | 123.61 | 7  | 2.9 | PHIVOLCS |
| 15-Sep-21 | 7:49 AM  | 12.74 | 123.18 | 13 | 3.6 | PHIVOLCS |
| 22-Sep-21 | 4:40 AM  | 11.88 | 124.08 | 8  | 2.8 | PHIVOLCS |
| 25-Sep-21 | 6:30 PM  | 12.43 | 123.44 | 23 | 2   | PHIVOLCS |
| 28-Sep-21 | 3:59 AM  | 12.07 | 123.98 | 9  | 2.7 | PHIVOLCS |
| 15-Oct-21 | 1:55 AM  | 12.5  | 123.54 | 7  | 2.4 | PHIVOLCS |
| 15-Oct-21 | 3:08 AM  | 12.31 | 123.8  | 15 | 3.6 | PHIVOLCS |
| 16-Oct-21 | 11:29 AM | 11.83 | 124.21 | 1  | 2.5 | PHIVOLCS |
| 16-Oct-21 | 6:44 PM  | 11.86 | 124.2  | 1  | 2.7 | PHIVOLCS |
| 19-Oct-21 | 11:55 PM | 11.85 | 124.19 | 1  | 2.1 | PHIVOLCS |

|           |          |       |        |    |     |          |
|-----------|----------|-------|--------|----|-----|----------|
| 27-Oct-21 | 1:03 PM  | 11.74 | 124.14 | 29 | 2   | PHIVOLCS |
| 1-Nov-21  | 3:33 PM  | 11.92 | 124.06 | 1  | 2.2 | PHIVOLCS |
| 2-Nov-21  | 12:49 AM | 11.8  | 124.18 | 6  | 3.4 | PHIVOLCS |
| 8-Nov-21  | 12:15 AM | 13    | 122.64 | 8  | 3.1 | PHIVOLCS |
| 17-Nov-21 | 8:52 AM  | 12.08 | 123.99 | 4  | 4   | PHIVOLCS |
| 17-Nov-21 | 8:55 AM  | 12.07 | 124.01 | 27 | 2.2 | PHIVOLCS |
| 17-Nov-21 | 9:15 AM  | 12.03 | 123.96 | 3  | 2.9 | PHIVOLCS |
| 18-Nov-21 | 1:43 AM  | 12.24 | 123.7  | 34 | 1.7 | PHIVOLCS |
| 19-Nov-21 | 2:31 PM  | 11.88 | 124.09 | 5  | 2.6 | PHIVOLCS |
| 20-Nov-21 | 11:40 AM | 12.21 | 123.86 | 4  | 3.7 | PHIVOLCS |
| 21-Nov-21 | 9:52 AM  | 12.14 | 123.9  | 3  | 3.1 | PHIVOLCS |
| 21-Nov-21 | 10:52 AM | 12.22 | 123.9  | 20 | 2.7 | PHIVOLCS |
| 23-Nov-21 | 3:47 AM  | 11.79 | 124.17 | 14 | 3.3 | PHIVOLCS |
| 2-Dec-21  | 7:23 PM  | 12.82 | 123.52 | 9  | 3.6 | PHIVOLCS |
| 17-Dec-21 | 10:33 PM | 12.8  | 123.63 | 29 | 2.5 | PHIVOLCS |
| 17-Dec-21 | 10:41 PM | 12.81 | 123.56 | 2  | 3.3 | PHIVOLCS |
| 17-Dec-21 | 10:44 PM | 12.88 | 123.51 | 9  | 2.4 | PHIVOLCS |
| 17-Dec-21 | 10:58 PM | 12.85 | 123.54 | 28 | 4.1 | PHIVOLCS |
| 19-Dec-21 | 4:29 AM  | 12.68 | 123.09 | 18 | 2.7 | PHIVOLCS |
| 24-Dec-21 | 2:30 AM  | 11.74 | 124.28 | 3  | 2.6 | PHIVOLCS |
| 24-Dec-21 | 8:51 PM  | 12.22 | 123.87 | 12 | 3.5 | PHIVOLCS |



Table S6: Historical seismicity from USGS-NEIC

| Time (UTC)     | Lat    | Long    | Depth | Mag  | MagType | RMS  | net       | id              |
|----------------|--------|---------|-------|------|---------|------|-----------|-----------------|
| 2/17/03 16:07  | 12.02  | 123.978 | 20.7  | 4.6  | mb      | 0.86 | us        | usp000bqwk      |
| 2/15/03 11:01  | 12.168 | 124.079 | 10    | 6.3  | mwc     | 1.4  | us        | usp000bqr6      |
| 2/15/03 7:18   | 12.033 | 123.956 | 10    | 4.6  | mb      | 1.23 | us        | usp000bqqp      |
| 2/15/03 5:47   | 12.171 | 123.921 | 10    | 5.8  | mwc     | 1.12 | us        | usp000bqqg      |
| 2/14/03 19:56  | 12.152 | 123.869 | 10    | 4.5  | mb      | 1.03 | us        | usp000bqpf      |
| 8/23/01 8:32   | 12.646 | 123.811 | 33    | 4.5  | mb      | 1.37 | us        | usp000amx4      |
| 8/12/01 0:41   | 12.581 | 123.524 | 75.4  | 4.7  | mb      | 1.13 | us        | usp000am9c      |
| 7/30/01 5:14   | 12.598 | 123.381 | 33    | 5.4  | mwc     | 0.94 | us        | usp000akga      |
| 8/15/99 0:41   | 11.816 | 124.251 | 33    | 5.4  | mwc     | 0.95 | us        | usp0009d1r      |
| 8/29/98 11:03  | 12.641 | 123.483 | 33    | 4.6  | mb      | 1.41 | us        | usp0008u1t      |
| 8/1/98 21:21   | 12.403 | 123.834 | 33    | 5.3  | mwc     | 1.29 | us        | usp0008skz      |
| 5/7/98 13:53   | 12.239 | 123.435 | 33    | 5.1  | mwc     | 1.44 | us        | usp0008mmk      |
| 7/15/97 13:08  | 12.56  | 123.143 | 33    | 4.6  | mb      | 1.14 | us        | usp00084wn      |
| 3/18/96 19:56  | 12.792 | 123.297 | 33    | 4.5  | ms      | 1.1  | us        | usp0007eyk      |
| 9/7/93 23:01   | 11.937 | 124.125 | 26.5  | 4.5  | mb      | 1.2  | us        | usp0005zxc      |
| 7/25/93 3:28   | 11.853 | 124.015 | 30.6  | 4.5  | mb      | 1.2  | us        | usp0005xb6      |
| 7/8/93 16:47   | 11.984 | 124.197 | 18.1  | 4.9  | mb      | 1.2  | us        | usp0005vts      |
| 4/24/93 15:45  | 11.926 | 124.124 | 42.6  | 4.6  | mb      | 1.1  | us        | usp0005rqr      |
| 1/18/93 19:56  | 11.843 | 124.3   | 30.9  | 4.7  | mb      | 1.3  | us        | usp0005kxv      |
| 7/22/91 7:13   | 12.71  | 123.376 | 22.8  | 4.7  | mb      | 1.1  | us        | usp0004ufw      |
| 4/23/91 2:50   | 13.087 | 123.239 | 40    | 5.2  | mb      | 1    | us        | usp0004qpz      |
| 3/27/91 16:27  | 12.535 | 123.475 | 47    | 4.7  | mb      | 1.1  | us        | usp0004pmu      |
| 3/27/91 9:14   | 12.55  | 123.461 | 33    | 5.1  | ms      | 1.1  | us        | usp0004pm7      |
| 7/18/90 20:10  | 12.642 | 123.585 | 33    | 5    | mb      | 1.1  | us        | usp0004c65      |
| 1/24/84 16:27  | 12.244 | 123.946 | 18.1  | 4.9  | mb      | 1.7  | us        | usp00021hg      |
| 1/24/84 16:22  | 12.364 | 123.875 | 24.4  | 5.9  | mw      | 1.2  | us        | usp00021hf      |
| 8/5/83 18:08   | 12.5   | 123.938 | 32.5  | 5.1  | mb      | 1.4  | us        | usp0001xc4      |
| 6/13/83 5:59   | 12.696 | 123.144 | 37.7  | 4.7  | mb      | 1.4  | us        | usp0001w2e      |
| 4/25/83 19:03  | 12.787 | 123.052 | 28.6  | 5.1  | mb      | 0.9  | us        | usp0001usa      |
| 3/17/83 18:10  | 12.91  | 122.94  | 33    | 5.7  | ms      | 1.2  | us        | usp0001tqg      |
| 10/10/82 5:13  | 12.193 | 123.851 | 14.6  | 4.8  | mb      | 1.2  | us        | usp0001q4w      |
| 7/14/78 17:12  | 12.131 | 124.028 | 33    | 5.3  | mb      |      | us        | usp0000vk1      |
| 11/8/77 3:47   | 12.23  | 123.908 | 33    | 5.3  | ms      |      | us        | usp0000rdw      |
| 7/25/71 12:51  | 12.439 | 123.691 | 40    | 6.44 | mw      |      | iscgem    | iscgem782654    |
| 7/2/71 5:34    | 12.36  | 123.899 | 25    | 6.07 | mw      |      | iscgem    | iscgem781837    |
| 11/13/70 14:16 | 12.081 | 123.863 | 13.5  | 6.55 | mw      |      | iscgem    | iscgem790180    |
| 6/21/67 15:45  | 12.874 | 122.938 | 29.3  | 5.53 | mw      |      | iscgem    | iscgem834734    |
| 3/13/58 23:49  | 12.658 | 123.092 | 25    | 5.84 | mw      |      | iscgem    | iscgem883999    |
| 8/18/57 8:37   | 12.221 | 123.959 | 20    | 6.48 | mw      |      | iscgem    | iscgem887045    |
| 11/5/41 17:38  | 12.808 | 123.518 | 15    | 6.85 | mw      |      | iscgem    | iscgem901063    |
| 5/25/39 6:16   | 12.938 | 122.954 | 15    | 5.78 | mw      |      | iscgem    | iscgem901989    |
| 8/29/38 15:22  | 12.036 | 124.134 | 15    | 6.75 | mw      |      | iscgem    | iscgem902648    |
| 9/22/37 3:11   | 12.391 | 123.841 | 15    | 6.26 | mw      |      | iscgem    | iscgem903260    |
| 4/23/22 21:30  | 12.106 | 123.392 | 35    | 6.23 | mw      |      | iscgemsup | iscgemsup911875 |
| 5/28/17 12:01  | 12.77  | 123.047 | 15    | 5.96 | mw      |      | iscgemsup | iscgemsup913514 |

## S4 SBAS Interferometry Output and Data

### S4.1 Profile data

Definition of column names:

- boxID - boxID number (box 51 is closest to Cataingan bay, box 3 is closest to Naro bay)
- dist\_naro - distance of box profile from Naro bay in km
- LrMin - minimum extent of the regression line on the left side
- LrMax - maximum extent of the regression line on the left side
- Ly0 - ordinate of the leftmost limit of the regression line
- Ly1\_int - intercept of the regression line of the left side
- left\_slope - slope of the regression line of the left side
- left\_intercept - intercept of the regression line of the left side
- RrMin - minimum extent of the regression line on the right side
- RrMax - maximum extent of the regression line on the right side
- Ry0\_int - intercept of the regression line of the right side
- Ry1 - ordinate of the rightmost limit of the regression line
- Offset - measured slip from the intercepts of both sides in m
- sigmaBsum - sum of the standard error of regression intercepts of the left and right side

Table S7: Compiled regression parameters of the fault parallel afterslip from time series interferometry

| boxID | dist_naro  | LrMin | LrMax | Ly0        | Ly1_int | RrMin | RrMax | Ry0_int | Ry1       | Offset | sigmaBsum  |
|-------|------------|-------|-------|------------|---------|-------|-------|---------|-----------|--------|------------|
| 3     | 0.35301441 | -1270 | -250  | -0.00055   | -0.0023 | 500   | 1520  | 0.0405  | 0.037     | 0.0428 | 0.00284239 |
| 4     | 0.91454843 | -1360 | -310  | 0.0032     | -0.0073 | 290   | 1460  | 0.0464  | 0.0499    | 0.0537 | 0.00344597 |
| 5     | 1.42951316 | -1120 | -370  | -0.00245   | -0.0147 | 440   | 1130  | 0.0493  | 0.0668    | 0.064  | 0.00578339 |
| 6     | 2.00220612 | -1050 | -190  | -0.0101    | -0.0136 | 150   | 1220  | 0.0534  | 0.0709    | 0.067  | 0.00515096 |
| 7     | 2.50100729 | -1700 | -130  | -0.00795   | -0.0132 | 350   | 950   | 0.055   | 0.06375   | 0.0682 | 0.00596387 |
| 8     | 3.04949265 | -1750 | -40   | -0.0126    | -0.0161 | 230   | 900   | 0.0484  | 0.0659    | 0.0645 | 0.00547217 |
| 9     | 3.55203461 | -1750 | -110  | -0.01295   | -0.0147 | 370   | 890   | 0.0465  | 0.064     | 0.0612 | 0.00639642 |
| 10    | 4.07317648 | -1750 | -770  | -0.02215   | -0.0204 | 350   | 560   | 0.0566  | 0.0741    | 0.077  | 0.01135092 |
| 11    | 4.58750381 | -1415 | -770  | -0.02145   | -0.0197 | 170   | 1000  | 0.0605  | 0.078     | 0.0802 | 0.00725525 |
| 12    | 5.09068063 | -1430 | -310  | -0.02445   | -0.0157 | 270   | 1280  | 0.0663  | 0.0698    | 0.082  | 0.00609765 |
| 13    | 5.60109659 | -1510 | -340  | -0.024505  | -0.0244 | 50    | 1430  | 0.0593  | 0.0558    | 0.0837 | 0.00511354 |
| 14    | 6.11920439 | -580  | -160  | -0.0154    | -0.0224 | 290   | 1310  | 0.0551  | 0.04985   | 0.0775 | 0.0060088  |
| 15    | 6.62486192 | -460  | -50   | -0.0091    | -0.0084 | 400   | 1300  | 0.0516  | 0.050025  | 0.06   | 0.00473446 |
| 16    | 7.13955771 | -790  | -330  | -0.00635   | -0.0081 | 270   | 630   | 0.0453  | 0.046175  | 0.0534 | 0.00617887 |
| 17    | 7.64745173 | -1300 | -200  | -0.010475  | -0.011  | 575   | 1240  | 0.0392  | 0.03885   | 0.0502 | 0.00413589 |
| 18    | 8.14601638 | -1305 | -300  | -0.012025  | -0.0136 | 850   | 1305  | 0.0384  | 0.03805   | 0.052  | 0.00493906 |
| 19    | 8.66244769 | -1120 | -200  | -0.0046    | -0.0186 | 380   | 1170  | 0.0519  | 0.0484    | 0.0705 | 0.00502087 |
| 20    | 9.16723875 | -700  | -150  | -0.00825   | -0.0205 | 680   | 1615  | 0.0715  | 0.071605  | 0.092  | 0.00696304 |
| 21    | 9.67724099 | -700  | -10   | -0.0081    | -0.0256 | 1010  | 1750  | 0.0706  | 0.0671    | 0.0962 | 0.00749073 |
| 22    | 10.2048984 | -580  | -320  | -0.02535   | -0.0271 | 980   | 1425  | 0.0467  | 0.06245   | 0.0738 | 0.00992499 |
| 23    | 10.7055065 | -735  | -140  | -0.0161    | -0.0336 | 945   | 1295  | 0.0279  | 0.028005  | 0.0615 | 0.00606461 |
| 24    | 11.2242614 | -550  | -175  | -0.02375   | -0.0325 | 750   | 1750  | 0.0281  | 0.0316    | 0.0606 | 0.00578514 |
| 25    | 11.7250739 | -1095 | -315  | -0.033905  | -0.0338 | 380   | 1750  | 0.0352  | 0.035375  | 0.069  | 0.00486956 |
| 26    | 12.2427272 | -1180 | -190  | -0.0405475 | -0.0406 | 310   | 1235  | 0.0425  | 0.040925  | 0.0831 | 0.00597106 |
| 27    | 12.752487  | -1200 | -415  | -0.03895   | -0.0407 | 315   | 905   | 0.0436  | 0.0422    | 0.0843 | 0.00718267 |
| 28    | 13.2469022 | -825  | -375  | -0.03795   | -0.0397 | 565   | 1090  | 0.0389  | 0.03855   | 0.0786 | 0.00793864 |
| 29    | 13.7612246 | -880  | -500  | -0.038325  | -0.0385 | 645   | 1590  | 0.0353  | 0.035405  | 0.0738 | 0.00701215 |
| 30    | 14.2836273 | -1085 | -400  | -0.0338525 | -0.0338 | 900   | 1705  | 0.0336  | 0.0371    | 0.0674 | 0.00579291 |
| 31    | 14.7836173 | -730  | -205  | -0.03025   | -0.0313 | 20    | 375   | 0.0376  | 0.037425  | 0.0689 | 0.00753193 |
| 32    | 15.311448  | -1750 | -180  | -0.0276    | -0.0311 | 25    | 1750  | 0.0394  | 0.037825  | 0.0705 | 0.00371754 |
| 33    | 15.8195208 | -1750 | -220  | -0.0319    | -0.0354 | 300   | 1750  | 0.0549  | 0.04265   | 0.0903 | 0.00470037 |
| 34    | 16.3299616 | -875  | -345  | -0.04775   | -0.039  | 275   | 1135  | 0.0528  | 0.04405   | 0.0918 | 0.00787106 |
| 35    | 16.8427703 | -915  | -470  | -0.05135   | -0.0531 | 185   | 665   | 0.0514  | 0.0479    | 0.1045 | 0.01082571 |
| 36    | 17.3409541 | -1235 | -310  | -0.056325  | -0.0579 | 180   | 820   | 0.0515  | 0.048     | 0.1094 | 0.00871415 |
| 37    | 17.8833241 | -900  | -160  | -0.0595    | -0.0602 | 295   | 1535  | 0.0502  | 0.0502875 | 0.1104 | 0.00814591 |
| 38    | 18.3630961 | -780  | -70   | -0.06015   | -0.0654 | 850   | 1500  | 0.055   | 0.0543    | 0.1204 | 0.01020997 |
| 39    | 18.856134  | -865  | -115  | -0.06646   | -0.0666 | 835   | 1500  | 0.0531  | 0.05296   | 0.1197 | 0.01008642 |
| 40    | 19.39392   | -610  | -120  | -0.069575  | -0.0701 | 555   | 1420  | 0.0503  | 0.05065   | 0.1204 | 0.01095628 |
| 41    | 19.9004125 | -625  | -200  | -0.07273   | -0.0728 | 350   | 1355  | 0.0488  | 0.04845   | 0.1216 | 0.01136394 |
| 42    | 20.4183179 | -530  | -155  | -0.074375  | -0.0749 | 340   | 905   | 0.0479  | 0.04755   | 0.1228 | 0.01321516 |
| 43    | 20.933317  | -515  | -175  | -0.078675  | -0.0792 | 210   | 755   | 0.0442  | 0.0435    | 0.1234 | 0.0138948  |
| 44    | 21.4330272 | -860  | -135  | -0.07165   | -0.0839 | 260   | 950   | 0.039   | 0.03865   | 0.1229 | 0.01000801 |
| 45    | 21.9484487 | -640  | -50   | -0.0809425 | -0.0811 | 140   | 850   | 0.0403  | 0.0473    | 0.1214 | 0.01109887 |
| 46    | 22.4706024 | -1750 | 0     | -0.063     | -0.0805 | 50    | 970   | 0.0511  | 0.04585   | 0.1316 | 0.00758686 |
| 47    | 22.9684135 | -1750 | 0     | -0.06945   | -0.0852 | 40    | 1070  | 0.0549  | 0.04965   | 0.1401 | 0.00792688 |
| 48    | 23.4760262 | -1750 | 0     | -0.07545   | -0.0912 | 245   | 1105  | 0.0447  | 0.045225  | 0.1359 | 0.00794515 |
| 49    | 23.9801034 | -1750 | 0     | -0.0622    | -0.0972 | 300   | 940   | 0.0455  | 0.049     | 0.1427 | 0.00866862 |
| 50    | 24.5000114 | -1750 | -50   | -0.0733    | -0.0908 | 320   | 995   | 0.0346  | 0.03425   | 0.1254 | 0.00737379 |
| 51    | 25.0104121 | -1750 | -350  | -0.0543    | -0.0893 | 210   | 1170  | 0.0258  | 0.025905  | 0.1151 | 0.00642529 |

## S4.2 Other MintPy data

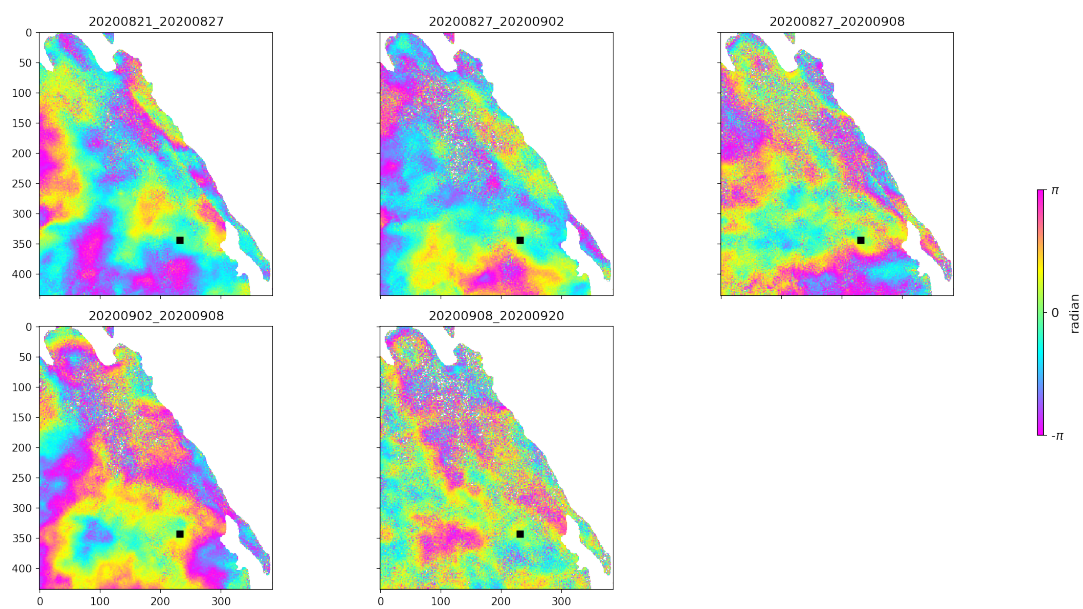

Figure S13: Ascending track interferograms included in the time-series stacking.

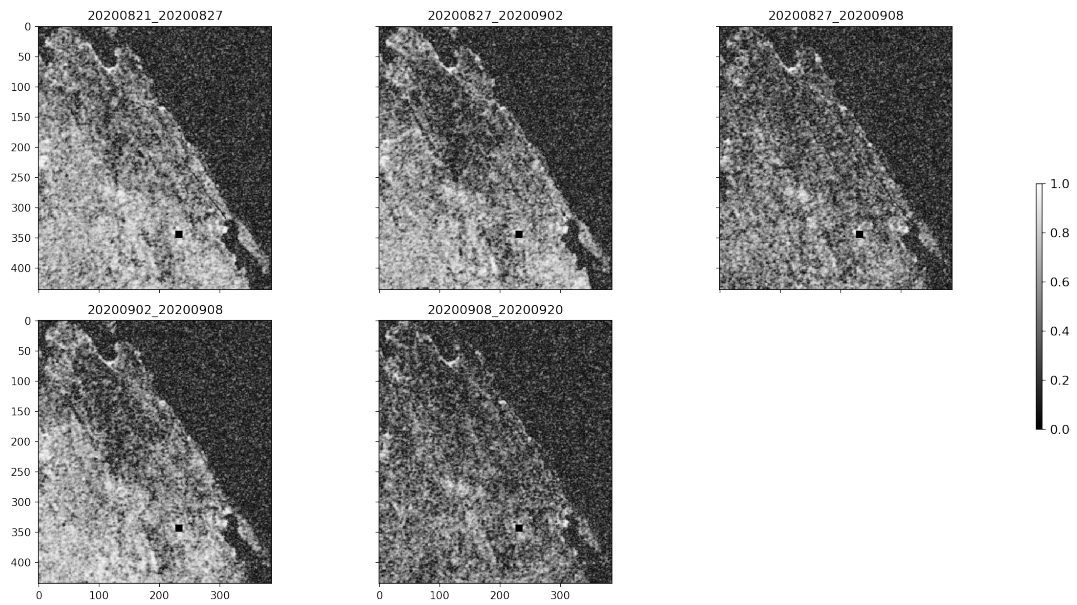

Figure S14: Individual coherence of ascending track interferograms in the stack.

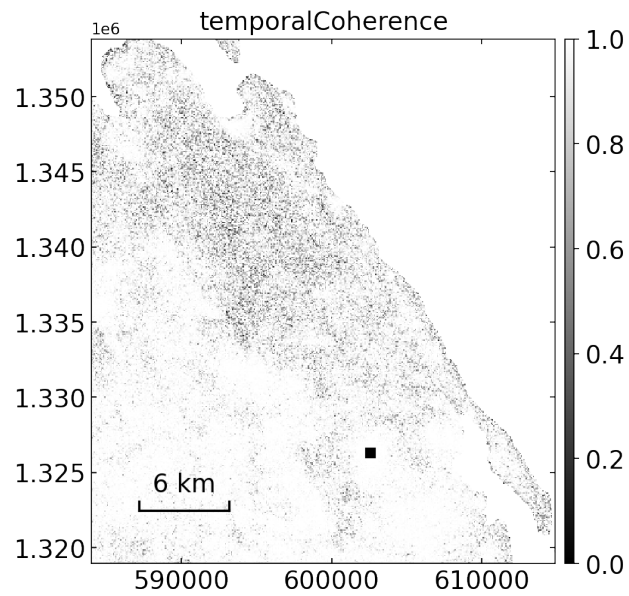

Figure S15: Temporal coherence of the ascending interferogram stack.

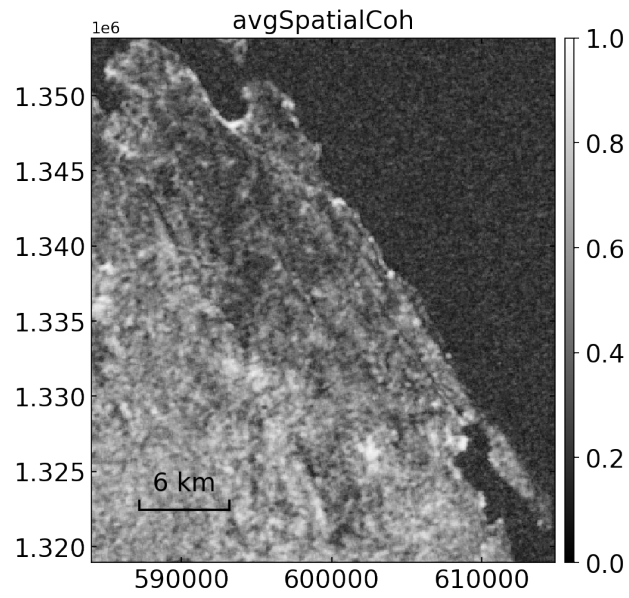

Figure S16: Spatial coherence of the ascending interferogram stack.

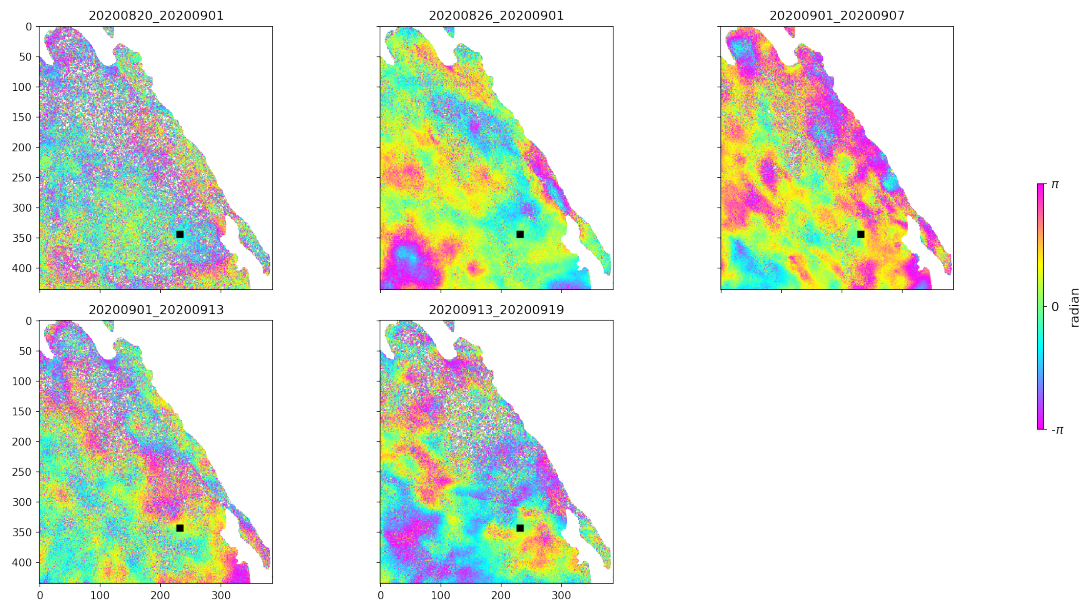

Figure S17: Descending track interferograms included in the time-series stacking.

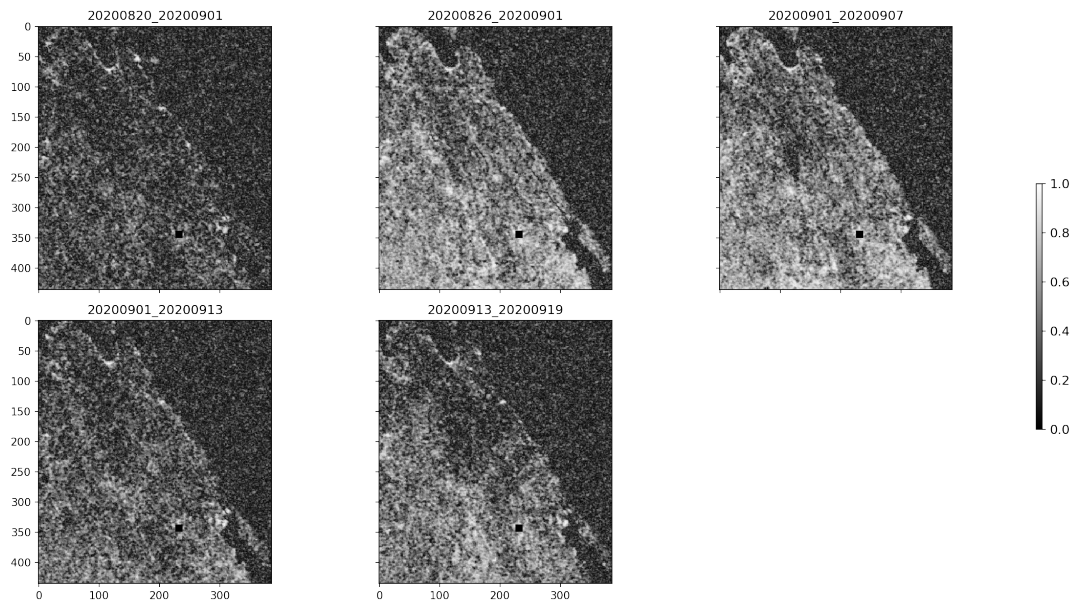

Figure S18: Individual coherence of descending track interferograms in the stack.

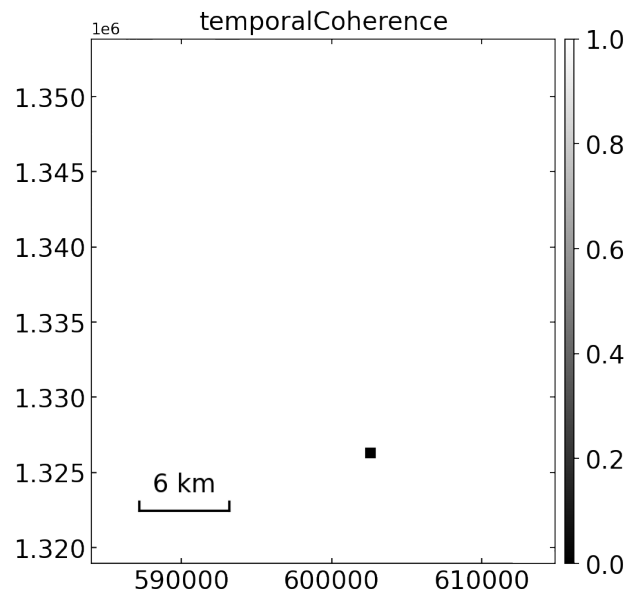

Figure S19: Temporal coherence of the descending interferogram stack.

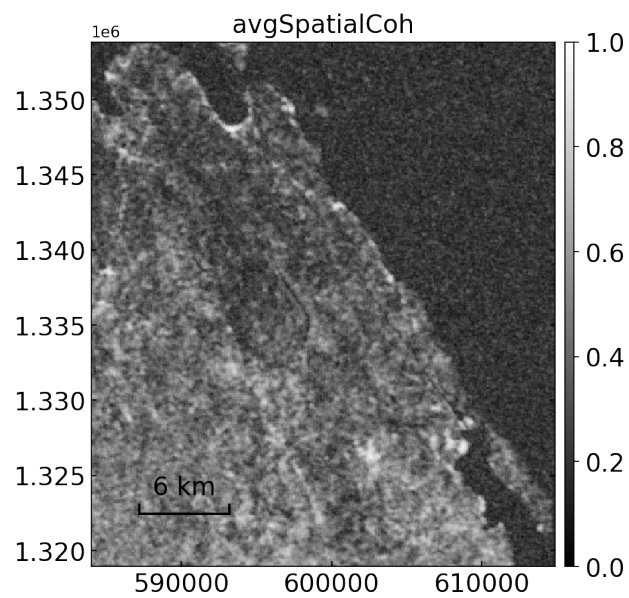

Figure S20: Spatial coherence of the descending interferogram stack.
